# Supplementary material for: Modeling land use and land cover change: using a hindcast to estimate economic parameters in gcamland v2.0
Source: Copernicus journal article supplement (doi:10.5194/gmd-15-429-2022), 2022-01-19
Supplement: Supplementary file 1 [file gmd-15-429-2022-supplement.zip]

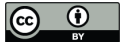

*Supplement of*

## **Modeling land use and land cover change: using a hindcast to estimate economic parameters in gcamland v2.0**

**Katherine V. Calvin et al.**

*Correspondence to:* Katherine V. Calvin ([katherine.calvin@pnnl.gov](mailto:katherine.calvin@pnnl.gov))

- [gmd-15-429-2022-supplement-title-page.pdf](#)
- [Calvin\\_GMD\\_ResultsFromFigureS11.xlsx](#)
- [Calvin\\_SM\\_text.pdf](#)

The copyright of individual parts of the supplement might differ from the article licence.
