# Supplementary material for: Modeling land use and land cover change: using a hindcast to estimate economic parameters in gcamland v2.0
Source: Copernicus journal article supplement (doi:10.5194/gmd-15-429-2022), 2022-01-19
Supplement: Supplementary file 3 [file gmd-15-429-2022-supplement.zip]

Archive with 3 entries (3 files):
- Calvin_SM_text.pdf
- Calvin_GMD_ResultsFromFigureS11.xlsx
- gmd-15-429-2022-supplement-title-page.pdf
