# Supplementary material for: Modeling land use and land cover change: using a hindcast to estimate economic parameters in gcamland v2.0
Source: Copernicus journal article supplement (doi:10.5194/gmd-15-429-2022), 2022-01-19
Supplement: Supplementary file 3 [file gmd-15-429-2022-supplement.zip › Calvin_GMD_ResultsFromFigureS11.xlsx]

## Sheet: README
Source
Calvin, K. V., Snyder, A., Zhao, X., and Wise, M.: Modeling Land Use and Land Cover Change: Using a Hindcast to Estimate Economic Parameters in gcamland v2.0, Geosci. Model Dev. Discuss. [preprint], https://doi.org/10.5194/gmd-2020-338, in review, 2020.
About
This file includes physical and harvested land from gcamland from 1990-2015 for four different expectation types. For each expectation type, the parameter set that minimizes NRMSE is used within gcamland.
The data here is also shown in Figure S11.
gcamland model code and input data is available at https://github.com/JGCRI/gcamland
The code used to generate this data is available at https://github.com/JGCRI/calvin-etal_2021_gmd

## Sheet: all_land_results
expectation.type	objfun	initial.model.year	comparison.years	comparison.landTypes	assumption	GCAM_commodity	year	physical.land	harvested.land
Adaptive	nrms	1990	1990-2015	All Crops	Default	UrbanLand	1990	116.34	NA
Adaptive	nrms	1990	1990-2015	All Crops	Default	UrbanLand	1991	116.34	NA
Adaptive	nrms	1990	1990-2015	All Crops	Default	UrbanLand	1992	116.34	NA
Adaptive	nrms	1990	1990-2015	All Crops	Default	UrbanLand	1993	116.34	NA
Adaptive	nrms	1990	1990-2015	All Crops	Default	UrbanLand	1994	116.34	NA
Adaptive	nrms	1990	1990-2015	All Crops	Default	UrbanLand	1995	116.34	NA
Adaptive	nrms	1990	1990-2015	All Crops	Default	UrbanLand	1996	116.34	NA
Adaptive	nrms	1990	1990-2015	All Crops	Default	UrbanLand	1997	116.34	NA
Adaptive	nrms	1990	1990-2015	All Crops	Default	UrbanLand	1998	116.34	NA
Adaptive	nrms	1990	1990-2015	All Crops	Default	UrbanLand	1999	116.34	NA
Adaptive	nrms	1990	1990-2015	All Crops	Default	UrbanLand	2000	116.34	NA
Adaptive	nrms	1990	1990-2015	All Crops	Default	UrbanLand	2001	116.34	NA
Adaptive	nrms	1990	1990-2015	All Crops	Default	UrbanLand	2002	116.34	NA
Adaptive	nrms	1990	1990-2015	All Crops	Default	UrbanLand	2003	116.34	NA
Adaptive	nrms	1990	1990-2015	All Crops	Default	UrbanLand	2004	116.34	NA
Adaptive	nrms	1990	1990-2015	All Crops	Default	UrbanLand	2005	116.34	NA
Adaptive	nrms	1990	1990-2015	All Crops	Default	UrbanLand	2006	116.34	NA
Adaptive	nrms	1990	1990-2015	All Crops	Default	UrbanLand	2007	116.34	NA
Adaptive	nrms	1990	1990-2015	All Crops	Default	UrbanLand	2008	116.34	NA
Adaptive	nrms	1990	1990-2015	All Crops	Default	UrbanLand	2009	116.34	NA
Adaptive	nrms	1990	1990-2015	All Crops	Default	UrbanLand	2010	116.34	NA
Adaptive	nrms	1990	1990-2015	All Crops	Default	UrbanLand	2011	116.34	NA
Adaptive	nrms	1990	1990-2015	All Crops	Default	UrbanLand	2012	116.34	NA
Adaptive	nrms	1990	1990-2015	All Crops	Default	UrbanLand	2013	116.34	NA
Adaptive	nrms	1990	1990-2015	All Crops	Default	UrbanLand	2014	116.34	NA
Adaptive	nrms	1990	1990-2015	All Crops	Default	UrbanLand	2015	116.34	NA
Adaptive	nrms	1990	1990-2015	All Crops	Default	Tundra	1990	240.732	NA
Adaptive	nrms	1990	1990-2015	All Crops	Default	Tundra	1991	240.732	NA
Adaptive	nrms	1990	1990-2015	All Crops	Default	Tundra	1992	240.732	NA
Adaptive	nrms	1990	1990-2015	All Crops	Default	Tundra	1993	240.732	NA
Adaptive	nrms	1990	1990-2015	All Crops	Default	Tundra	1994	240.732	NA
Adaptive	nrms	1990	1990-2015	All Crops	Default	Tundra	1995	240.732	NA
Adaptive	nrms	1990	1990-2015	All Crops	Default	Tundra	1996	240.732	NA
Adaptive	nrms	1990	1990-2015	All Crops	Default	Tundra	1997	240.732	NA
Adaptive	nrms	1990	1990-2015	All Crops	Default	Tundra	1998	240.732	NA
Adaptive	nrms	1990	1990-2015	All Crops	Default	Tundra	1999	240.732	NA
Adaptive	nrms	1990	1990-2015	All Crops	Default	Tundra	2000	240.732	NA
Adaptive	nrms	1990	1990-2015	All Crops	Default	Tundra	2001	240.732	NA
Adaptive	nrms	1990	1990-2015	All Crops	Default	Tundra	2002	240.732	NA
Adaptive	nrms	1990	1990-2015	All Crops	Default	Tundra	2003	240.732	NA
Adaptive	nrms	1990	1990-2015	All Crops	Default	Tundra	2004	240.732	NA
Adaptive	nrms	1990	1990-2015	All Crops	Default	Tundra	2005	240.732	NA
Adaptive	nrms	1990	1990-2015	All Crops	Default	Tundra	2006	240.732	NA
Adaptive	nrms	1990	1990-2015	All Crops	Default	Tundra	2007	240.732	NA
Adaptive	nrms	1990	1990-2015	All Crops	Default	Tundra	2008	240.732	NA
Adaptive	nrms	1990	1990-2015	All Crops	Default	Tundra	2009	240.732	NA
Adaptive	nrms	1990	1990-2015	All Crops	Default	Tundra	2010	240.732	NA
Adaptive	nrms	1990	1990-2015	All Crops	Default	Tundra	2011	240.732	NA
Adaptive	nrms	1990	1990-2015	All Crops	Default	Tundra	2012	240.732	NA
Adaptive	nrms	1990	1990-2015	All Crops	Default	Tundra	2013	240.732	NA
Adaptive	nrms	1990	1990-2015	All Crops	Default	Tundra	2014	240.732	NA
Adaptive	nrms	1990	1990-2015	All Crops	Default	Tundra	2015	240.732	NA
Adaptive	nrms	1990	1990-2015	All Crops	Default	RockIceDesert	1990	34.1785	NA
Adaptive	nrms	1990	1990-2015	All Crops	Default	RockIceDesert	1991	34.1785	NA
Adaptive	nrms	1990	1990-2015	All Crops	Default	RockIceDesert	1992	34.1785	NA
Adaptive	nrms	1990	1990-2015	All Crops	Default	RockIceDesert	1993	34.1785	NA
Adaptive	nrms	1990	1990-2015	All Crops	Default	RockIceDesert	1994	34.1785	NA
Adaptive	nrms	1990	1990-2015	All Crops	Default	RockIceDesert	1995	34.1785	NA
Adaptive	nrms	1990	1990-2015	All Crops	Default	RockIceDesert	1996	34.1785	NA
Adaptive	nrms	1990	1990-2015	All Crops	Default	RockIceDesert	1997	34.1785	NA
Adaptive	nrms	1990	1990-2015	All Crops	Default	RockIceDesert	1998	34.1785	NA
Adaptive	nrms	1990	1990-2015	All Crops	Default	RockIceDesert	1999	34.1785	NA
Adaptive	nrms	1990	1990-2015	All Crops	Default	RockIceDesert	2000	34.1785	NA
Adaptive	nrms	1990	1990-2015	All Crops	Default	RockIceDesert	2001	34.1785	NA
Adaptive	nrms	1990	1990-2015	All Crops	Default	RockIceDesert	2002	34.1785	NA
Adaptive	nrms	1990	1990-2015	All Crops	Default	RockIceDesert	2003	34.1785	NA
Adaptive	nrms	1990	1990-2015	All Crops	Default	RockIceDesert	2004	34.1785	NA
Adaptive	nrms	1990	1990-2015	All Crops	Default	RockIceDesert	2005	34.1785	NA
Adaptive	nrms	1990	1990-2015	All Crops	Default	RockIceDesert	2006	34.1785	NA
Adaptive	nrms	1990	1990-2015	All Crops	Default	RockIceDesert	2007	34.1785	NA
Adaptive	nrms	1990	1990-2015	All Crops	Default	RockIceDesert	2008	34.1785	NA
Adaptive	nrms	1990	1990-2015	All Crops	Default	RockIceDesert	2009	34.1785	NA
Adaptive	nrms	1990	1990-2015	All Crops	Default	RockIceDesert	2010	34.1785	NA
Adaptive	nrms	1990	1990-2015	All Crops	Default	RockIceDesert	2011	34.1785	NA
Adaptive	nrms	1990	1990-2015	All Crops	Default	RockIceDesert	2012	34.1785	NA
Adaptive	nrms	1990	1990-2015	All Crops	Default	RockIceDesert	2013	34.1785	NA
Adaptive	nrms	1990	1990-2015	All Crops	Default	RockIceDesert	2014	34.1785	NA
Adaptive	nrms	1990	1990-2015	All Crops	Default	RockIceDesert	2015	34.1785	NA
Adaptive	nrms	1990	1990-2015	All Crops	Default	UnmanagedPasture	1990	2313.1	NA
Adaptive	nrms	1990	1990-2015	All Crops	Default	UnmanagedPasture	1991	2306.44	NA
Adaptive	nrms	1990	1990-2015	All Crops	Default	UnmanagedPasture	1992	2309.03	NA
Adaptive	nrms	1990	1990-2015	All Crops	Default	UnmanagedPasture	1993	2308.43	NA
Adaptive	nrms	1990	1990-2015	All Crops	Default	UnmanagedPasture	1994	2308.63	NA
Adaptive	nrms	1990	1990-2015	All Crops	Default	UnmanagedPasture	1995	2307.42	NA
Adaptive	nrms	1990	1990-2015	All Crops	Default	UnmanagedPasture	1996	2296.36	NA
Adaptive	nrms	1990	1990-2015	All Crops	Default	UnmanagedPasture	1997	2283.83	NA
Adaptive	nrms	1990	1990-2015	All Crops	Default	UnmanagedPasture	1998	2290.19	NA
Adaptive	nrms	1990	1990-2015	All Crops	Default	UnmanagedPasture	1999	2306.13	NA
Adaptive	nrms	1990	1990-2015	All Crops	Default	UnmanagedPasture	2000	2320.49	NA
Adaptive	nrms	1990	1990-2015	All Crops	Default	UnmanagedPasture	2001	2327.63	NA
Adaptive	nrms	1990	1990-2015	All Crops	Default	UnmanagedPasture	2002	2321.85	NA
Adaptive	nrms	1990	1990-2015	All Crops	Default	UnmanagedPasture	2003	2320.11	NA
Adaptive	nrms	1990	1990-2015	All Crops	Default	UnmanagedPasture	2004	2313.2	NA
Adaptive	nrms	1990	1990-2015	All Crops	Default	UnmanagedPasture	2005	2319.48	NA
Adaptive	nrms	1990	1990-2015	All Crops	Default	UnmanagedPasture	2006	2328.14	NA
Adaptive	nrms	1990	1990-2015	All Crops	Default	UnmanagedPasture	2007	2319.8	NA
Adaptive	nrms	1990	1990-2015	All Crops	Default	UnmanagedPasture	2008	2309.17	NA
Adaptive	nrms	1990	1990-2015	All Crops	Default	UnmanagedPasture	2009	2296.49	NA
Adaptive	nrms	1990	1990-2015	All Crops	Default	UnmanagedPasture	2010	2294.26	NA
Adaptive	nrms	1990	1990-2015	All Crops	Default	UnmanagedPasture	2011	2288.61	NA
Adaptive	nrms	1990	1990-2015	All Crops	Default	UnmanagedPasture	2012	2271.22	NA
Adaptive	nrms	1990	1990-2015	All Crops	Default	UnmanagedPasture	2013	2260.17	NA
Adaptive	nrms	1990	1990-2015	All Crops	Default	UnmanagedPasture	2014	2265.98	NA
Adaptive	nrms	1990	1990-2015	All Crops	Default	UnmanagedPasture	2015	2272.22	NA
Adaptive	nrms	1990	1990-2015	All Crops	Default	Pasture	1990	67.8453	67.8453
Adaptive	nrms	1990	1990-2015	All Crops	Default	Pasture	1991	67.6498	67.6498
Adaptive	nrms	1990	1990-2015	All Crops	Default	Pasture	1992	67.726	67.726
Adaptive	nrms	1990	1990-2015	All Crops	Default	Pasture	1993	67.7083	67.7083
Adaptive	nrms	1990	1990-2015	All Crops	Default	Pasture	1994	67.7142	67.7142
Adaptive	nrms	1990	1990-2015	All Crops	Default	Pasture	1995	67.6787	67.6787
Adaptive	nrms	1990	1990-2015	All Crops	Default	Pasture	1996	67.3541	67.3541
Adaptive	nrms	1990	1990-2015	All Crops	Default	Pasture	1997	66.9868	66.9868
Adaptive	nrms	1990	1990-2015	All Crops	Default	Pasture	1998	67.1734	67.1734
Adaptive	nrms	1990	1990-2015	All Crops	Default	Pasture	1999	67.6408	67.6408
Adaptive	nrms	1990	1990-2015	All Crops	Default	Pasture	2000	68.0619	68.0619
Adaptive	nrms	1990	1990-2015	All Crops	Default	Pasture	2001	68.2715	68.2715
Adaptive	nrms	1990	1990-2015	All Crops	Default	Pasture	2002	68.102	68.102
Adaptive	nrms	1990	1990-2015	All Crops	Default	Pasture	2003	68.0508	68.0508
Adaptive	nrms	1990	1990-2015	All Crops	Default	Pasture	2004	67.8483	67.8483
Adaptive	nrms	1990	1990-2015	All Crops	Default	Pasture	2005	68.0322	68.0322
Adaptive	nrms	1990	1990-2015	All Crops	Default	Pasture	2006	68.2863	68.2863
Adaptive	nrms	1990	1990-2015	All Crops	Default	Pasture	2007	68.0417	68.0417
Adaptive	nrms	1990	1990-2015	All Crops	Default	Pasture	2008	67.73	67.73
Adaptive	nrms	1990	1990-2015	All Crops	Default	Pasture	2009	67.358	67.358
Adaptive	nrms	1990	1990-2015	All Crops	Default	Pasture	2010	67.2926	67.2926
Adaptive	nrms	1990	1990-2015	All Crops	Default	Pasture	2011	67.1269	67.1269
Adaptive	nrms	1990	1990-2015	All Crops	Default	Pasture	2012	66.6169	66.6169
Adaptive	nrms	1990	1990-2015	All Crops	Default	Pasture	2013	66.2927	66.2927
Adaptive	nrms	1990	1990-2015	All Crops	Default	Pasture	2014	66.4632	66.4632
Adaptive	nrms	1990	1990-2015	All Crops	Default	Pasture	2015	66.6462	66.6462
Adaptive	nrms	1990	1990-2015	All Crops	Default	Shrubland	1990	742.798	NA
Adaptive	nrms	1990	1990-2015	All Crops	Default	Shrubland	1991	740.569	NA
Adaptive	nrms	1990	1990-2015	All Crops	Default	Shrubland	1992	741.437	NA
Adaptive	nrms	1990	1990-2015	All Crops	Default	Shrubland	1993	741.236	NA
Adaptive	nrms	1990	1990-2015	All Crops	Default	Shrubland	1994	741.303	NA
Adaptive	nrms	1990	1990-2015	All Crops	Default	Shrubland	1995	740.898	NA
Adaptive	nrms	1990	1990-2015	All Crops	Default	Shrubland	1996	737.199	NA
Adaptive	nrms	1990	1990-2015	All Crops	Default	Shrubland	1997	733.014	NA
Adaptive	nrms	1990	1990-2015	All Crops	Default	Shrubland	1998	735.139	NA
Adaptive	nrms	1990	1990-2015	All Crops	Default	Shrubland	1999	740.466	NA
Adaptive	nrms	1990	1990-2015	All Crops	Default	Shrubland	2000	745.267	NA
Adaptive	nrms	1990	1990-2015	All Crops	Default	Shrubland	2001	747.657	NA
Adaptive	nrms	1990	1990-2015	All Crops	Default	Shrubland	2002	745.724	NA
Adaptive	nrms	1990	1990-2015	All Crops	Default	Shrubland	2003	745.141	NA
Adaptive	nrms	1990	1990-2015	All Crops	Default	Shrubland	2004	742.832	NA
Adaptive	nrms	1990	1990-2015	All Crops	Default	Shrubland	2005	744.929	NA
Adaptive	nrms	1990	1990-2015	All Crops	Default	Shrubland	2006	747.826	NA
Adaptive	nrms	1990	1990-2015	All Crops	Default	Shrubland	2007	745.037	NA
Adaptive	nrms	1990	1990-2015	All Crops	Default	Shrubland	2008	741.483	NA
Adaptive	nrms	1990	1990-2015	All Crops	Default	Shrubland	2009	737.243	NA
Adaptive	nrms	1990	1990-2015	All Crops	Default	Shrubland	2010	736.498	NA
Adaptive	nrms	1990	1990-2015	All Crops	Default	Shrubland	2011	734.61	NA
Adaptive	nrms	1990	1990-2015	All Crops	Default	Shrubland	2012	728.8	NA
Adaptive	nrms	1990	1990-2015	All Crops	Default	Shrubland	2013	725.109	NA
Adaptive	nrms	1990	1990-2015	All Crops	Default	Shrubland	2014	727.05	NA
Adaptive	nrms	1990	1990-2015	All Crops	Default	Shrubland	2015	729.134	NA
Adaptive	nrms	1990	1990-2015	All Crops	Default	Grassland	1990	588.538	NA
Adaptive	nrms	1990	1990-2015	All Crops	Default	Grassland	1991	586.772	NA
Adaptive	nrms	1990	1990-2015	All Crops	Default	Grassland	1992	587.46	NA
Adaptive	nrms	1990	1990-2015	All Crops	Default	Grassland	1993	587.301	NA
Adaptive	nrms	1990	1990-2015	All Crops	Default	Grassland	1994	587.353	NA
Adaptive	nrms	1990	1990-2015	All Crops	Default	Grassland	1995	587.033	NA
Adaptive	nrms	1990	1990-2015	All Crops	Default	Grassland	1996	584.102	NA
Adaptive	nrms	1990	1990-2015	All Crops	Default	Grassland	1997	580.786	NA
Adaptive	nrms	1990	1990-2015	All Crops	Default	Grassland	1998	582.47	NA
Adaptive	nrms	1990	1990-2015	All Crops	Default	Grassland	1999	586.69	NA
Adaptive	nrms	1990	1990-2015	All Crops	Default	Grassland	2000	590.494	NA
Adaptive	nrms	1990	1990-2015	All Crops	Default	Grassland	2001	592.388	NA
Adaptive	nrms	1990	1990-2015	All Crops	Default	Grassland	2002	590.856	NA
Adaptive	nrms	1990	1990-2015	All Crops	Default	Grassland	2003	590.394	NA
Adaptive	nrms	1990	1990-2015	All Crops	Default	Grassland	2004	588.565	NA
Adaptive	nrms	1990	1990-2015	All Crops	Default	Grassland	2005	590.226	NA
Adaptive	nrms	1990	1990-2015	All Crops	Default	Grassland	2006	592.522	NA
Adaptive	nrms	1990	1990-2015	All Crops	Default	Grassland	2007	590.312	NA
Adaptive	nrms	1990	1990-2015	All Crops	Default	Grassland	2008	587.496	NA
Adaptive	nrms	1990	1990-2015	All Crops	Default	Grassland	2009	584.137	NA
Adaptive	nrms	1990	1990-2015	All Crops	Default	Grassland	2010	583.546	NA
Adaptive	nrms	1990	1990-2015	All Crops	Default	Grassland	2011	582.051	NA
Adaptive	nrms	1990	1990-2015	All Crops	Default	Grassland	2012	577.447	NA
Adaptive	nrms	1990	1990-2015	All Crops	Default	Grassland	2013	574.523	NA
Adaptive	nrms	1990	1990-2015	All Crops	Default	Grassland	2014	576.06	NA
Adaptive	nrms	1990	1990-2015	All Crops	Default	Grassland	2015	577.712	NA
Adaptive	nrms	1990	1990-2015	All Crops	Default	OtherArableLand	1990	685.461	NA
Adaptive	nrms	1990	1990-2015	All Crops	Default	OtherArableLand	1991	680.442	NA
Adaptive	nrms	1990	1990-2015	All Crops	Default	OtherArableLand	1992	682.752	NA
Adaptive	nrms	1990	1990-2015	All Crops	Default	OtherArableLand	1993	682.791	NA
Adaptive	nrms	1990	1990-2015	All Crops	Default	OtherArableLand	1994	684.339	NA
Adaptive	nrms	1990	1990-2015	All Crops	Default	OtherArableLand	1995	684.613	NA
Adaptive	nrms	1990	1990-2015	All Crops	Default	OtherArableLand	1996	676.672	NA
Adaptive	nrms	1990	1990-2015	All Crops	Default	OtherArableLand	1997	667.622	NA
Adaptive	nrms	1990	1990-2015	All Crops	Default	OtherArableLand	1998	673.312	NA
Adaptive	nrms	1990	1990-2015	All Crops	Default	OtherArableLand	1999	686.27	NA
Adaptive	nrms	1990	1990-2015	All Crops	Default	OtherArableLand	2000	698.327	NA
Adaptive	nrms	1990	1990-2015	All Crops	Default	OtherArableLand	2001	704.495	NA
Adaptive	nrms	1990	1990-2015	All Crops	Default	OtherArableLand	2002	699.394	NA
Adaptive	nrms	1990	1990-2015	All Crops	Default	OtherArableLand	2003	697.747	NA
Adaptive	nrms	1990	1990-2015	All Crops	Default	OtherArableLand	2004	691.87	NA
Adaptive	nrms	1990	1990-2015	All Crops	Default	OtherArableLand	2005	697.33	NA
Adaptive	nrms	1990	1990-2015	All Crops	Default	OtherArableLand	2006	704.962	NA
Adaptive	nrms	1990	1990-2015	All Crops	Default	OtherArableLand	2007	698.025	NA
Adaptive	nrms	1990	1990-2015	All Crops	Default	OtherArableLand	2008	689.42	NA
Adaptive	nrms	1990	1990-2015	All Crops	Default	OtherArableLand	2009	679.146	NA
Adaptive	nrms	1990	1990-2015	All Crops	Default	OtherArableLand	2010	677.281	NA
Adaptive	nrms	1990	1990-2015	All Crops	Default	OtherArableLand	2011	673.181	NA
Adaptive	nrms	1990	1990-2015	All Crops	Default	OtherArableLand	2012	659.777	NA
Adaptive	nrms	1990	1990-2015	All Crops	Default	OtherArableLand	2013	651.593	NA
Adaptive	nrms	1990	1990-2015	All Crops	Default	OtherArableLand	2014	656.508	NA
Adaptive	nrms	1990	1990-2015	All Crops	Default	OtherArableLand	2015	661.817	NA
Adaptive	nrms	1990	1990-2015	All Crops	Default	Wheat	1990	266.987	279.65
Adaptive	nrms	1990	1990-2015	All Crops	Default	Wheat	1991	263.624	276.127
Adaptive	nrms	1990	1990-2015	All Crops	Default	Wheat	1992	260.086	272.421
Adaptive	nrms	1990	1990-2015	All Crops	Default	Wheat	1993	258.705	270.975
Adaptive	nrms	1990	1990-2015	All Crops	Default	Wheat	1994	250.533	262.415
Adaptive	nrms	1990	1990-2015	All Crops	Default	Wheat	1995	242.964	254.487
Adaptive	nrms	1990	1990-2015	All Crops	Default	Wheat	1996	236.26	247.465
Adaptive	nrms	1990	1990-2015	All Crops	Default	Wheat	1997	234.903	246.044
Adaptive	nrms	1990	1990-2015	All Crops	Default	Wheat	1998	250.625	262.511
Adaptive	nrms	1990	1990-2015	All Crops	Default	Wheat	1999	255.669	267.795
Adaptive	nrms	1990	1990-2015	All Crops	Default	Wheat	2000	252.693	264.677
Adaptive	nrms	1990	1990-2015	All Crops	Default	Wheat	2001	243.749	255.31
Adaptive	nrms	1990	1990-2015	All Crops	Default	Wheat	2002	248.293	260.069
Adaptive	nrms	1990	1990-2015	All Crops	Default	Wheat	2003	232.783	243.824
Adaptive	nrms	1990	1990-2015	All Crops	Default	Wheat	2004	227.526	238.317
Adaptive	nrms	1990	1990-2015	All Crops	Default	Wheat	2005	219.107	229.499
Adaptive	nrms	1990	1990-2015	All Crops	Default	Wheat	2006	214.602	224.78
Adaptive	nrms	1990	1990-2015	All Crops	Default	Wheat	2007	204.074	213.753
Adaptive	nrms	1990	1990-2015	All Crops	Default	Wheat	2008	167.056	174.98
Adaptive	nrms	1990	1990-2015	All Crops	Default	Wheat	2009	189.995	199.006
Adaptive	nrms	1990	1990-2015	All Crops	Default	Wheat	2010	203.824	213.491
Adaptive	nrms	1990	1990-2015	All Crops	Default	Wheat	2011	184.971	193.744
Adaptive	nrms	1990	1990-2015	All Crops	Default	Wheat	2012	184.894	193.663
Adaptive	nrms	1990	1990-2015	All Crops	Default	Wheat	2013	191.157	200.223
Adaptive	nrms	1990	1990-2015	All Crops	Default	Wheat	2014	201.593	211.154
Adaptive	nrms	1990	1990-2015	All Crops	Default	Wheat	2015	216.178	226.431
Adaptive	nrms	1990	1990-2015	All Crops	Default	SugarCrop	1990	8.60991	8.97046
Adaptive	nrms	1990	1990-2015	All Crops	Default	SugarCrop	1991	8.53393	8.8913
Adaptive	nrms	1990	1990-2015	All Crops	Default	SugarCrop	1992	8.72435	9.08969
Adaptive	nrms	1990	1990-2015	All Crops	Default	SugarCrop	1993	8.7837	9.15153
Adaptive	nrms	1990	1990-2015	All Crops	Default	SugarCrop	1994	8.779	9.14663
Adaptive	nrms	1990	1990-2015	All Crops	Default	SugarCrop	1995	8.77074	9.13803
Adaptive	nrms	1990	1990-2015	All Crops	Default	SugarCrop	1996	8.63712	8.99881
Adaptive	nrms	1990	1990-2015	All Crops	Default	SugarCrop	1997	8.46037	8.81466
Adaptive	nrms	1990	1990-2015	All Crops	Default	SugarCrop	1998	8.57429	8.93334
Adaptive	nrms	1990	1990-2015	All Crops	Default	SugarCrop	1999	8.73323	9.09895
Adaptive	nrms	1990	1990-2015	All Crops	Default	SugarCrop	2000	8.86363	9.23481
Adaptive	nrms	1990	1990-2015	All Crops	Default	SugarCrop	2001	8.92549	9.29926
Adaptive	nrms	1990	1990-2015	All Crops	Default	SugarCrop	2002	8.84491	9.2153
Adaptive	nrms	1990	1990-2015	All Crops	Default	SugarCrop	2003	8.80647	9.17525
Adaptive	nrms	1990	1990-2015	All Crops	Default	SugarCrop	2004	8.72046	9.08564
Adaptive	nrms	1990	1990-2015	All Crops	Default	SugarCrop	2005	8.76762	9.13478
Adaptive	nrms	1990	1990-2015	All Crops	Default	SugarCrop	2006	8.84213	9.21241
Adaptive	nrms	1990	1990-2015	All Crops	Default	SugarCrop	2007	8.74564	9.11187
Adaptive	nrms	1990	1990-2015	All Crops	Default	SugarCrop	2008	8.62114	8.98216
Adaptive	nrms	1990	1990-2015	All Crops	Default	SugarCrop	2009	8.47589	8.83083
Adaptive	nrms	1990	1990-2015	All Crops	Default	SugarCrop	2010	8.4426	8.79614
Adaptive	nrms	1990	1990-2015	All Crops	Default	SugarCrop	2011	8.39877	8.75048
Adaptive	nrms	1990	1990-2015	All Crops	Default	SugarCrop	2012	8.23844	8.58344
Adaptive	nrms	1990	1990-2015	All Crops	Default	SugarCrop	2013	8.14471	8.48578
Adaptive	nrms	1990	1990-2015	All Crops	Default	SugarCrop	2014	8.19027	8.53325
Adaptive	nrms	1990	1990-2015	All Crops	Default	SugarCrop	2015	8.24031	8.58538
Adaptive	nrms	1990	1990-2015	All Crops	Default	Root_Tuber	1990	5.74808	5.9508
Adaptive	nrms	1990	1990-2015	All Crops	Default	Root_Tuber	1991	5.71217	5.91363
Adaptive	nrms	1990	1990-2015	All Crops	Default	Root_Tuber	1992	5.72839	5.93042
Adaptive	nrms	1990	1990-2015	All Crops	Default	Root_Tuber	1993	5.73228	5.93445
Adaptive	nrms	1990	1990-2015	All Crops	Default	Root_Tuber	1994	5.75365	5.95657
Adaptive	nrms	1990	1990-2015	All Crops	Default	Root_Tuber	1995	5.76062	5.96379
Adaptive	nrms	1990	1990-2015	All Crops	Default	Root_Tuber	1996	5.70436	5.90554
Adaptive	nrms	1990	1990-2015	All Crops	Default	Root_Tuber	1997	5.62686	5.82531
Adaptive	nrms	1990	1990-2015	All Crops	Default	Root_Tuber	1998	5.67788	5.87812
Adaptive	nrms	1990	1990-2015	All Crops	Default	Root_Tuber	1999	5.78839	5.99254
Adaptive	nrms	1990	1990-2015	All Crops	Default	Root_Tuber	2000	5.89483	6.10273
Adaptive	nrms	1990	1990-2015	All Crops	Default	Root_Tuber	2001	5.94803	6.15781
Adaptive	nrms	1990	1990-2015	All Crops	Default	Root_Tuber	2002	5.9159	6.12454
Adaptive	nrms	1990	1990-2015	All Crops	Default	Root_Tuber	2003	5.91032	6.11876
Adaptive	nrms	1990	1990-2015	All Crops	Default	Root_Tuber	2004	5.86369	6.07049
Adaptive	nrms	1990	1990-2015	All Crops	Default	Root_Tuber	2005	5.9133	6.12185
Adaptive	nrms	1990	1990-2015	All Crops	Default	Root_Tuber	2006	5.98939	6.20062
Adaptive	nrms	1990	1990-2015	All Crops	Default	Root_Tuber	2007	5.94241	6.15199
Adaptive	nrms	1990	1990-2015	All Crops	Default	Root_Tuber	2008	5.88115	6.08857
Adaptive	nrms	1990	1990-2015	All Crops	Default	Root_Tuber	2009	5.81473	6.01981
Adaptive	nrms	1990	1990-2015	All Crops	Default	Root_Tuber	2010	5.81705	6.0222
Adaptive	nrms	1990	1990-2015	All Crops	Default	Root_Tuber	2011	5.80265	6.00729
Adaptive	nrms	1990	1990-2015	All Crops	Default	Root_Tuber	2012	5.7065	5.90776
Adaptive	nrms	1990	1990-2015	All Crops	Default	Root_Tuber	2013	5.64987	5.84913
Adaptive	nrms	1990	1990-2015	All Crops	Default	Root_Tuber	2014	5.71516	5.91673
Adaptive	nrms	1990	1990-2015	All Crops	Default	Root_Tuber	2015	5.77909	5.9829
Adaptive	nrms	1990	1990-2015	All Crops	Default	Rice	1990	11.379	11.424
Adaptive	nrms	1990	1990-2015	All Crops	Default	Rice	1991	11.2352	11.2797
Adaptive	nrms	1990	1990-2015	All Crops	Default	Rice	1992	11.4052	11.4503
Adaptive	nrms	1990	1990-2015	All Crops	Default	Rice	1993	11.3784	11.4234
Adaptive	nrms	1990	1990-2015	All Crops	Default	Rice	1994	11.2719	11.3166
Adaptive	nrms	1990	1990-2015	All Crops	Default	Rice	1995	11.2933	11.338
Adaptive	nrms	1990	1990-2015	All Crops	Default	Rice	1996	10.9824	11.0259
Adaptive	nrms	1990	1990-2015	All Crops	Default	Rice	1997	10.89	10.9331
Adaptive	nrms	1990	1990-2015	All Crops	Default	Rice	1998	11.1121	11.1561
Adaptive	nrms	1990	1990-2015	All Crops	Default	Rice	1999	11.2973	11.342
Adaptive	nrms	1990	1990-2015	All Crops	Default	Rice	2000	11.9807	12.0281
Adaptive	nrms	1990	1990-2015	All Crops	Default	Rice	2001	11.9925	12.04
Adaptive	nrms	1990	1990-2015	All Crops	Default	Rice	2002	12.0105	12.058
Adaptive	nrms	1990	1990-2015	All Crops	Default	Rice	2003	11.8033	11.85
Adaptive	nrms	1990	1990-2015	All Crops	Default	Rice	2004	11.6123	11.6582
Adaptive	nrms	1990	1990-2015	All Crops	Default	Rice	2005	11.4674	11.5128
Adaptive	nrms	1990	1990-2015	All Crops	Default	Rice	2006	11.6875	11.7337
Adaptive	nrms	1990	1990-2015	All Crops	Default	Rice	2007	11.446	11.4913
Adaptive	nrms	1990	1990-2015	All Crops	Default	Rice	2008	10.8653	10.9083
Adaptive	nrms	1990	1990-2015	All Crops	Default	Rice	2009	10.9333	10.9766
Adaptive	nrms	1990	1990-2015	All Crops	Default	Rice	2010	10.9504	10.9937
Adaptive	nrms	1990	1990-2015	All Crops	Default	Rice	2011	10.4823	10.5237
Adaptive	nrms	1990	1990-2015	All Crops	Default	Rice	2012	10.2841	10.3248
Adaptive	nrms	1990	1990-2015	All Crops	Default	Rice	2013	9.84339	9.88235
Adaptive	nrms	1990	1990-2015	All Crops	Default	Rice	2014	10.0002	10.0398
Adaptive	nrms	1990	1990-2015	All Crops	Default	Rice	2015	10.4264	10.4676
Adaptive	nrms	1990	1990-2015	All Crops	Default	PalmFruit	1990	0	0
Adaptive	nrms	1990	1990-2015	All Crops	Default	PalmFruit	1991	0	0
Adaptive	nrms	1990	1990-2015	All Crops	Default	PalmFruit	1992	0	0
Adaptive	nrms	1990	1990-2015	All Crops	Default	PalmFruit	1993	0	0
Adaptive	nrms	1990	1990-2015	All Crops	Default	PalmFruit	1994	0	0
Adaptive	nrms	1990	1990-2015	All Crops	Default	PalmFruit	1995	0	0
Adaptive	nrms	1990	1990-2015	All Crops	Default	PalmFruit	1996	0	0
Adaptive	nrms	1990	1990-2015	All Crops	Default	PalmFruit	1997	0	0
Adaptive	nrms	1990	1990-2015	All Crops	Default	PalmFruit	1998	0	0
Adaptive	nrms	1990	1990-2015	All Crops	Default	PalmFruit	1999	0	0
Adaptive	nrms	1990	1990-2015	All Crops	Default	PalmFruit	2000	0	0
Adaptive	nrms	1990	1990-2015	All Crops	Default	PalmFruit	2001	0	0
Adaptive	nrms	1990	1990-2015	All Crops	Default	PalmFruit	2002	0	0
Adaptive	nrms	1990	1990-2015	All Crops	Default	PalmFruit	2003	0	0
Adaptive	nrms	1990	1990-2015	All Crops	Default	PalmFruit	2004	0	0
Adaptive	nrms	1990	1990-2015	All Crops	Default	PalmFruit	2005	0	0
Adaptive	nrms	1990	1990-2015	All Crops	Default	PalmFruit	2006	0	0
Adaptive	nrms	1990	1990-2015	All Crops	Default	PalmFruit	2007	0	0
Adaptive	nrms	1990	1990-2015	All Crops	Default	PalmFruit	2008	0	0
Adaptive	nrms	1990	1990-2015	All Crops	Default	PalmFruit	2009	0	0
Adaptive	nrms	1990	1990-2015	All Crops	Default	PalmFruit	2010	0	0
Adaptive	nrms	1990	1990-2015	All Crops	Default	PalmFruit	2011	0	0
Adaptive	nrms	1990	1990-2015	All Crops	Default	PalmFruit	2012	0	0
Adaptive	nrms	1990	1990-2015	All Crops	Default	PalmFruit	2013	0	0
Adaptive	nrms	1990	1990-2015	All Crops	Default	PalmFruit	2014	0	0
Adaptive	nrms	1990	1990-2015	All Crops	Default	PalmFruit	2015	0	0
Adaptive	nrms	1990	1990-2015	All Crops	Default	OtherGrain	1990	91.0264	94.978
Adaptive	nrms	1990	1990-2015	All Crops	Default	OtherGrain	1991	89.4708	93.3548
Adaptive	nrms	1990	1990-2015	All Crops	Default	OtherGrain	1992	86.7946	90.5624
Adaptive	nrms	1990	1990-2015	All Crops	Default	OtherGrain	1993	86.6507	90.4123
Adaptive	nrms	1990	1990-2015	All Crops	Default	OtherGrain	1994	85.1545	88.8511
Adaptive	nrms	1990	1990-2015	All Crops	Default	OtherGrain	1995	81.3113	84.8411
Adaptive	nrms	1990	1990-2015	All Crops	Default	OtherGrain	1996	77.975	81.36
Adaptive	nrms	1990	1990-2015	All Crops	Default	OtherGrain	1997	77.7584	81.134
Adaptive	nrms	1990	1990-2015	All Crops	Default	OtherGrain	1998	79.1145	82.549
Adaptive	nrms	1990	1990-2015	All Crops	Default	OtherGrain	1999	78.6614	82.0762
Adaptive	nrms	1990	1990-2015	All Crops	Default	OtherGrain	2000	77.5348	80.9007
Adaptive	nrms	1990	1990-2015	All Crops	Default	OtherGrain	2001	73.7943	76.9978
Adaptive	nrms	1990	1990-2015	All Crops	Default	OtherGrain	2002	76.0181	79.3182
Adaptive	nrms	1990	1990-2015	All Crops	Default	OtherGrain	2003	77.0448	80.3894
Adaptive	nrms	1990	1990-2015	All Crops	Default	OtherGrain	2004	74.7749	78.021
Adaptive	nrms	1990	1990-2015	All Crops	Default	OtherGrain	2005	69.5457	72.5648
Adaptive	nrms	1990	1990-2015	All Crops	Default	OtherGrain	2006	67.46	70.3885
Adaptive	nrms	1990	1990-2015	All Crops	Default	OtherGrain	2007	61.5039	64.1738
Adaptive	nrms	1990	1990-2015	All Crops	Default	OtherGrain	2008	43.6589	45.5542
Adaptive	nrms	1990	1990-2015	All Crops	Default	OtherGrain	2009	52.5136	54.7932
Adaptive	nrms	1990	1990-2015	All Crops	Default	OtherGrain	2010	56.8636	59.3322
Adaptive	nrms	1990	1990-2015	All Crops	Default	OtherGrain	2011	17.1691	17.9144
Adaptive	nrms	1990	1990-2015	All Crops	Default	OtherGrain	2012	28.8771	30.1307
Adaptive	nrms	1990	1990-2015	All Crops	Default	OtherGrain	2013	33.1542	34.5935
Adaptive	nrms	1990	1990-2015	All Crops	Default	OtherGrain	2014	39.5106	41.2258
Adaptive	nrms	1990	1990-2015	All Crops	Default	OtherGrain	2015	54.0635	56.4105
Adaptive	nrms	1990	1990-2015	All Crops	Default	OilCrop	1990	239.728	245.898
Adaptive	nrms	1990	1990-2015	All Crops	Default	OilCrop	1991	246.165	252.5
Adaptive	nrms	1990	1990-2015	All Crops	Default	OilCrop	1992	239.748	245.918
Adaptive	nrms	1990	1990-2015	All Crops	Default	OilCrop	1993	243.425	249.689
Adaptive	nrms	1990	1990-2015	All Crops	Default	OilCrop	1994	245.197	251.507
Adaptive	nrms	1990	1990-2015	All Crops	Default	OilCrop	1995	244.9	251.202
Adaptive	nrms	1990	1990-2015	All Crops	Default	OilCrop	1996	246.341	252.68
Adaptive	nrms	1990	1990-2015	All Crops	Default	OilCrop	1997	250.013	256.447
Adaptive	nrms	1990	1990-2015	All Crops	Default	OilCrop	1998	250.252	256.692
Adaptive	nrms	1990	1990-2015	All Crops	Default	OilCrop	1999	229.043	234.937
Adaptive	nrms	1990	1990-2015	All Crops	Default	OilCrop	2000	209.03	214.409
Adaptive	nrms	1990	1990-2015	All Crops	Default	OilCrop	2001	197.777	202.866
Adaptive	nrms	1990	1990-2015	All Crops	Default	OilCrop	2002	197.389	202.469
Adaptive	nrms	1990	1990-2015	All Crops	Default	OilCrop	2003	212.579	218.05
Adaptive	nrms	1990	1990-2015	All Crops	Default	OilCrop	2004	239.668	245.836
Adaptive	nrms	1990	1990-2015	All Crops	Default	OilCrop	2005	244.403	250.693
Adaptive	nrms	1990	1990-2015	All Crops	Default	OilCrop	2006	247.902	254.281
Adaptive	nrms	1990	1990-2015	All Crops	Default	OilCrop	2007	241.845	248.069
Adaptive	nrms	1990	1990-2015	All Crops	Default	OilCrop	2008	286.81	294.191
Adaptive	nrms	1990	1990-2015	All Crops	Default	OilCrop	2009	287.644	295.046
Adaptive	nrms	1990	1990-2015	All Crops	Default	OilCrop	2010	290.812	298.296
Adaptive	nrms	1990	1990-2015	All Crops	Default	OilCrop	2011	315.523	323.643
Adaptive	nrms	1990	1990-2015	All Crops	Default	OilCrop	2012	322.219	330.511
Adaptive	nrms	1990	1990-2015	All Crops	Default	OilCrop	2013	343.755	352.601
Adaptive	nrms	1990	1990-2015	All Crops	Default	OilCrop	2014	357.392	366.59
Adaptive	nrms	1990	1990-2015	All Crops	Default	OilCrop	2015	344.064	352.918
Adaptive	nrms	1990	1990-2015	All Crops	Default	MiscCrop	1990	37.1549	39.1103
Adaptive	nrms	1990	1990-2015	All Crops	Default	MiscCrop	1991	36.9258	38.8692
Adaptive	nrms	1990	1990-2015	All Crops	Default	MiscCrop	1992	37.2092	39.1675
Adaptive	nrms	1990	1990-2015	All Crops	Default	MiscCrop	1993	37.3196	39.2837
Adaptive	nrms	1990	1990-2015	All Crops	Default	MiscCrop	1994	37.4219	39.3914
Adaptive	nrms	1990	1990-2015	All Crops	Default	MiscCrop	1995	37.431	39.401
Adaptive	nrms	1990	1990-2015	All Crops	Default	MiscCrop	1996	36.9965	38.9436
Adaptive	nrms	1990	1990-2015	All Crops	Default	MiscCrop	1997	36.6819	38.6124
Adaptive	nrms	1990	1990-2015	All Crops	Default	MiscCrop	1998	37.0417	38.9912
Adaptive	nrms	1990	1990-2015	All Crops	Default	MiscCrop	1999	37.9233	39.9191
Adaptive	nrms	1990	1990-2015	All Crops	Default	MiscCrop	2000	38.7416	40.7805
Adaptive	nrms	1990	1990-2015	All Crops	Default	MiscCrop	2001	39.2418	41.307
Adaptive	nrms	1990	1990-2015	All Crops	Default	MiscCrop	2002	39.1014	41.1592
Adaptive	nrms	1990	1990-2015	All Crops	Default	MiscCrop	2003	39.1693	41.2308
Adaptive	nrms	1990	1990-2015	All Crops	Default	MiscCrop	2004	39.0097	41.0627
Adaptive	nrms	1990	1990-2015	All Crops	Default	MiscCrop	2005	39.4985	41.5773
Adaptive	nrms	1990	1990-2015	All Crops	Default	MiscCrop	2006	40.0959	42.2062
Adaptive	nrms	1990	1990-2015	All Crops	Default	MiscCrop	2007	39.8892	41.9886
Adaptive	nrms	1990	1990-2015	All Crops	Default	MiscCrop	2008	39.6091	41.6937
Adaptive	nrms	1990	1990-2015	All Crops	Default	MiscCrop	2009	39.2581	41.3242
Adaptive	nrms	1990	1990-2015	All Crops	Default	MiscCrop	2010	39.3796	41.4522
Adaptive	nrms	1990	1990-2015	All Crops	Default	MiscCrop	2011	39.3779	41.4503
Adaptive	nrms	1990	1990-2015	All Crops	Default	MiscCrop	2012	38.8334	40.8772
Adaptive	nrms	1990	1990-2015	All Crops	Default	MiscCrop	2013	38.5512	40.5801
Adaptive	nrms	1990	1990-2015	All Crops	Default	MiscCrop	2014	39.1129	41.1714
Adaptive	nrms	1990	1990-2015	All Crops	Default	MiscCrop	2015	39.6939	41.783
Adaptive	nrms	1990	1990-2015	All Crops	Default	FodderHerb	1990	130.713	135.258
Adaptive	nrms	1990	1990-2015	All Crops	Default	FodderHerb	1991	129.756	134.267
Adaptive	nrms	1990	1990-2015	All Crops	Default	FodderHerb	1992	130.197	134.723
Adaptive	nrms	1990	1990-2015	All Crops	Default	FodderHerb	1993	130.204	134.731
Adaptive	nrms	1990	1990-2015	All Crops	Default	FodderHerb	1994	130.499	135.036
Adaptive	nrms	1990	1990-2015	All Crops	Default	FodderHerb	1995	130.552	135.09
Adaptive	nrms	1990	1990-2015	All Crops	Default	FodderHerb	1996	129.037	133.523
Adaptive	nrms	1990	1990-2015	All Crops	Default	FodderHerb	1997	127.312	131.737
Adaptive	nrms	1990	1990-2015	All Crops	Default	FodderHerb	1998	128.397	132.86
Adaptive	nrms	1990	1990-2015	All Crops	Default	FodderHerb	1999	130.868	135.417
Adaptive	nrms	1990	1990-2015	All Crops	Default	FodderHerb	2000	133.167	137.796
Adaptive	nrms	1990	1990-2015	All Crops	Default	FodderHerb	2001	134.343	139.014
Adaptive	nrms	1990	1990-2015	All Crops	Default	FodderHerb	2002	133.37	138.007
Adaptive	nrms	1990	1990-2015	All Crops	Default	FodderHerb	2003	133.056	137.682
Adaptive	nrms	1990	1990-2015	All Crops	Default	FodderHerb	2004	131.935	136.522
Adaptive	nrms	1990	1990-2015	All Crops	Default	FodderHerb	2005	132.977	137.6
Adaptive	nrms	1990	1990-2015	All Crops	Default	FodderHerb	2006	134.432	139.106
Adaptive	nrms	1990	1990-2015	All Crops	Default	FodderHerb	2007	133.109	137.737
Adaptive	nrms	1990	1990-2015	All Crops	Default	FodderHerb	2008	131.468	136.039
Adaptive	nrms	1990	1990-2015	All Crops	Default	FodderHerb	2009	129.509	134.011
Adaptive	nrms	1990	1990-2015	All Crops	Default	FodderHerb	2010	129.154	133.644
Adaptive	nrms	1990	1990-2015	All Crops	Default	FodderHerb	2011	128.372	132.835
Adaptive	nrms	1990	1990-2015	All Crops	Default	FodderHerb	2012	125.816	130.19
Adaptive	nrms	1990	1990-2015	All Crops	Default	FodderHerb	2013	124.255	128.575
Adaptive	nrms	1990	1990-2015	All Crops	Default	FodderHerb	2014	125.192	129.544
Adaptive	nrms	1990	1990-2015	All Crops	Default	FodderHerb	2015	126.205	130.592
Adaptive	nrms	1990	1990-2015	All Crops	Default	FodderGrass	1990	64.4678	65.55
Adaptive	nrms	1990	1990-2015	All Crops	Default	FodderGrass	1991	63.9958	65.07
Adaptive	nrms	1990	1990-2015	All Crops	Default	FodderGrass	1992	64.213	65.2909
Adaptive	nrms	1990	1990-2015	All Crops	Default	FodderGrass	1993	64.2167	65.2946
Adaptive	nrms	1990	1990-2015	All Crops	Default	FodderGrass	1994	64.3623	65.4427
Adaptive	nrms	1990	1990-2015	All Crops	Default	FodderGrass	1995	64.388	65.4688
Adaptive	nrms	1990	1990-2015	All Crops	Default	FodderGrass	1996	63.6412	64.7095
Adaptive	nrms	1990	1990-2015	All Crops	Default	FodderGrass	1997	62.79	63.844
Adaptive	nrms	1990	1990-2015	All Crops	Default	FodderGrass	1998	63.3252	64.3882
Adaptive	nrms	1990	1990-2015	All Crops	Default	FodderGrass	1999	64.5439	65.6273
Adaptive	nrms	1990	1990-2015	All Crops	Default	FodderGrass	2000	65.6778	66.7803
Adaptive	nrms	1990	1990-2015	All Crops	Default	FodderGrass	2001	66.258	67.3702
Adaptive	nrms	1990	1990-2015	All Crops	Default	FodderGrass	2002	65.7782	66.8824
Adaptive	nrms	1990	1990-2015	All Crops	Default	FodderGrass	2003	65.6233	66.7248
Adaptive	nrms	1990	1990-2015	All Crops	Default	FodderGrass	2004	65.0705	66.1628
Adaptive	nrms	1990	1990-2015	All Crops	Default	FodderGrass	2005	65.5841	66.685
Adaptive	nrms	1990	1990-2015	All Crops	Default	FodderGrass	2006	66.3018	67.4148
Adaptive	nrms	1990	1990-2015	All Crops	Default	FodderGrass	2007	65.6494	66.7514
Adaptive	nrms	1990	1990-2015	All Crops	Default	FodderGrass	2008	64.8402	65.9286
Adaptive	nrms	1990	1990-2015	All Crops	Default	FodderGrass	2009	63.8738	64.946
Adaptive	nrms	1990	1990-2015	All Crops	Default	FodderGrass	2010	63.6985	64.7678
Adaptive	nrms	1990	1990-2015	All Crops	Default	FodderGrass	2011	63.3129	64.3756
Adaptive	nrms	1990	1990-2015	All Crops	Default	FodderGrass	2012	62.0522	63.0938
Adaptive	nrms	1990	1990-2015	All Crops	Default	FodderGrass	2013	61.2825	62.3112
Adaptive	nrms	1990	1990-2015	All Crops	Default	FodderGrass	2014	61.7447	62.7812
Adaptive	nrms	1990	1990-2015	All Crops	Default	FodderGrass	2015	62.2441	63.2889
Adaptive	nrms	1990	1990-2015	All Crops	Default	FiberCrop	1990	46.9682	47.48
Adaptive	nrms	1990	1990-2015	All Crops	Default	FiberCrop	1991	47.3089	47.8245
Adaptive	nrms	1990	1990-2015	All Crops	Default	FiberCrop	1992	47.6791	48.1987
Adaptive	nrms	1990	1990-2015	All Crops	Default	FiberCrop	1993	47.4534	47.9706
Adaptive	nrms	1990	1990-2015	All Crops	Default	FiberCrop	1994	47.403	47.9196
Adaptive	nrms	1990	1990-2015	All Crops	Default	FiberCrop	1995	46.6222	47.1303
Adaptive	nrms	1990	1990-2015	All Crops	Default	FiberCrop	1996	46.1133	46.6159
Adaptive	nrms	1990	1990-2015	All Crops	Default	FiberCrop	1997	46.7356	47.2449
Adaptive	nrms	1990	1990-2015	All Crops	Default	FiberCrop	1998	48.7342	49.2653
Adaptive	nrms	1990	1990-2015	All Crops	Default	FiberCrop	1999	49.1471	49.6827
Adaptive	nrms	1990	1990-2015	All Crops	Default	FiberCrop	2000	48.9884	49.5223
Adaptive	nrms	1990	1990-2015	All Crops	Default	FiberCrop	2001	48.868	49.4005
Adaptive	nrms	1990	1990-2015	All Crops	Default	FiberCrop	2002	48.6978	49.2285
Adaptive	nrms	1990	1990-2015	All Crops	Default	FiberCrop	2003	47.5476	48.0657
Adaptive	nrms	1990	1990-2015	All Crops	Default	FiberCrop	2004	46.8938	47.4049
Adaptive	nrms	1990	1990-2015	All Crops	Default	FiberCrop	2005	46.279	46.7833
Adaptive	nrms	1990	1990-2015	All Crops	Default	FiberCrop	2006	46.7349	47.2442
Adaptive	nrms	1990	1990-2015	All Crops	Default	FiberCrop	2007	43.5635	44.0383
Adaptive	nrms	1990	1990-2015	All Crops	Default	FiberCrop	2008	43.0305	43.4995
Adaptive	nrms	1990	1990-2015	All Crops	Default	FiberCrop	2009	42.895	43.3624
Adaptive	nrms	1990	1990-2015	All Crops	Default	FiberCrop	2010	41.7207	42.1753
Adaptive	nrms	1990	1990-2015	All Crops	Default	FiberCrop	2011	41.7015	42.156
Adaptive	nrms	1990	1990-2015	All Crops	Default	FiberCrop	2012	39.9013	40.3361
Adaptive	nrms	1990	1990-2015	All Crops	Default	FiberCrop	2013	40.1034	40.5404
Adaptive	nrms	1990	1990-2015	All Crops	Default	FiberCrop	2014	40.1201	40.5573
Adaptive	nrms	1990	1990-2015	All Crops	Default	FiberCrop	2015	43.1022	43.5719
Adaptive	nrms	1990	1990-2015	All Crops	Default	Corn	1990	267.418	273.719
Adaptive	nrms	1990	1990-2015	All Crops	Default	Corn	1991	289.276	296.092
Adaptive	nrms	1990	1990-2015	All Crops	Default	Corn	1992	288.65	295.451
Adaptive	nrms	1990	1990-2015	All Crops	Default	Corn	1993	284.333	291.033
Adaptive	nrms	1990	1990-2015	All Crops	Default	Corn	1994	279.289	285.87
Adaptive	nrms	1990	1990-2015	All Crops	Default	Corn	1995	285.565	292.293
Adaptive	nrms	1990	1990-2015	All Crops	Default	Corn	1996	330.692	338.484
Adaptive	nrms	1990	1990-2015	All Crops	Default	Corn	1997	370.004	378.722
Adaptive	nrms	1990	1990-2015	All Crops	Default	Corn	1998	318.928	326.442
Adaptive	nrms	1990	1990-2015	All Crops	Default	Corn	1999	269.925	276.285
Adaptive	nrms	1990	1990-2015	All Crops	Default	Corn	2000	233.964	239.476
Adaptive	nrms	1990	1990-2015	All Crops	Default	Corn	2001	227.736	233.102
Adaptive	nrms	1990	1990-2015	All Crops	Default	Corn	2002	246.638	252.45
Adaptive	nrms	1990	1990-2015	All Crops	Default	Corn	2003	255.757	261.783
Adaptive	nrms	1990	1990-2015	All Crops	Default	Corn	2004	265.916	272.181
Adaptive	nrms	1990	1990-2015	All Crops	Default	Corn	2005	247.993	253.836
Adaptive	nrms	1990	1990-2015	All Crops	Default	Corn	2006	212.392	217.396
Adaptive	nrms	1990	1990-2015	All Crops	Default	Corn	2007	271.131	277.519
Adaptive	nrms	1990	1990-2015	All Crops	Default	Corn	2008	322.962	330.572
Adaptive	nrms	1990	1990-2015	All Crops	Default	Corn	2009	340.661	348.687
Adaptive	nrms	1990	1990-2015	All Crops	Default	Corn	2010	329.798	337.569
Adaptive	nrms	1990	1990-2015	All Crops	Default	Corn	2011	382.736	391.754
Adaptive	nrms	1990	1990-2015	All Crops	Default	Corn	2012	433.133	443.338
Adaptive	nrms	1990	1990-2015	All Crops	Default	Corn	2013	442.007	452.421
Adaptive	nrms	1990	1990-2015	All Crops	Default	Corn	2014	383.659	392.699
Adaptive	nrms	1990	1990-2015	All Crops	Default	Corn	2015	334.895	342.786
Adaptive	nrms	1990	1990-2015	All Crops	Default	UnmanagedForest	1990	2327.69	NA
Adaptive	nrms	1990	1990-2015	All Crops	Default	UnmanagedForest	1991	2314.32	NA
Adaptive	nrms	1990	1990-2015	All Crops	Default	UnmanagedForest	1992	2313.78	NA
Adaptive	nrms	1990	1990-2015	All Crops	Default	UnmanagedForest	1993	2304.78	NA
Adaptive	nrms	1990	1990-2015	All Crops	Default	UnmanagedForest	1994	2283.33	NA
Adaptive	nrms	1990	1990-2015	All Crops	Default	UnmanagedForest	1995	2262.67	NA
Adaptive	nrms	1990	1990-2015	All Crops	Default	UnmanagedForest	1996	2234.8	NA
Adaptive	nrms	1990	1990-2015	All Crops	Default	UnmanagedForest	1997	2206.68	NA
Adaptive	nrms	1990	1990-2015	All Crops	Default	UnmanagedForest	1998	2203.71	NA
Adaptive	nrms	1990	1990-2015	All Crops	Default	UnmanagedForest	1999	2220.62	NA
Adaptive	nrms	1990	1990-2015	All Crops	Default	UnmanagedForest	2000	2234.96	NA
Adaptive	nrms	1990	1990-2015	All Crops	Default	UnmanagedForest	2001	2241.46	NA
Adaptive	nrms	1990	1990-2015	All Crops	Default	UnmanagedForest	2002	2237.69	NA
Adaptive	nrms	1990	1990-2015	All Crops	Default	UnmanagedForest	2003	2238.25	NA
Adaptive	nrms	1990	1990-2015	All Crops	Default	UnmanagedForest	2004	2232.05	NA
Adaptive	nrms	1990	1990-2015	All Crops	Default	UnmanagedForest	2005	2235.9	NA
Adaptive	nrms	1990	1990-2015	All Crops	Default	UnmanagedForest	2006	2241.53	NA
Adaptive	nrms	1990	1990-2015	All Crops	Default	UnmanagedForest	2007	2230.3	NA
Adaptive	nrms	1990	1990-2015	All Crops	Default	UnmanagedForest	2008	2214.64	NA
Adaptive	nrms	1990	1990-2015	All Crops	Default	UnmanagedForest	2009	2199.02	NA
Adaptive	nrms	1990	1990-2015	All Crops	Default	UnmanagedForest	2010	2197.47	NA
Adaptive	nrms	1990	1990-2015	All Crops	Default	UnmanagedForest	2011	2184.67	NA
Adaptive	nrms	1990	1990-2015	All Crops	Default	UnmanagedForest	2012	2160.7	NA
Adaptive	nrms	1990	1990-2015	All Crops	Default	UnmanagedForest	2013	2143.18	NA
Adaptive	nrms	1990	1990-2015	All Crops	Default	UnmanagedForest	2014	2142.41	NA
Adaptive	nrms	1990	1990-2015	All Crops	Default	UnmanagedForest	2015	2142.12	NA
Adaptive	nrms	1990	1990-2015	All Crops	Default	Forest	1990	655.518	655.518
Adaptive	nrms	1990	1990-2015	All Crops	Default	Forest	1991	662.962	662.962
Adaptive	nrms	1990	1990-2015	All Crops	Default	Forest	1992	668.535	668.535
Adaptive	nrms	1990	1990-2015	All Crops	Default	Forest	1993	680.7	680.7
Adaptive	nrms	1990	1990-2015	All Crops	Default	Forest	1994	712.822	712.822
Adaptive	nrms	1990	1990-2015	All Crops	Default	Forest	1995	741.281	741.281
Adaptive	nrms	1990	1990-2015	All Crops	Default	Forest	1996	762.294	762.294
Adaptive	nrms	1990	1990-2015	All Crops	Default	Forest	1997	781.059	781.059
Adaptive	nrms	1990	1990-2015	All Crops	Default	Forest	1998	797.372	797.372
Adaptive	nrms	1990	1990-2015	All Crops	Default	Forest	1999	801.736	801.736
Adaptive	nrms	1990	1990-2015	All Crops	Default	Forest	2000	807.027	807.027
Adaptive	nrms	1990	1990-2015	All Crops	Default	Forest	2001	810.61	810.61
Adaptive	nrms	1990	1990-2015	All Crops	Default	Forest	2002	805.473	805.473
Adaptive	nrms	1990	1990-2015	All Crops	Default	Forest	2003	801.379	801.379
Adaptive	nrms	1990	1990-2015	All Crops	Default	Forest	2004	797.792	797.792
Adaptive	nrms	1990	1990-2015	All Crops	Default	Forest	2005	803.728	803.728
Adaptive	nrms	1990	1990-2015	All Crops	Default	Forest	2006	811.451	811.451
Adaptive	nrms	1990	1990-2015	All Crops	Default	Forest	2007	812.733	812.733
Adaptive	nrms	1990	1990-2015	All Crops	Default	Forest	2008	816.413	816.413
Adaptive	nrms	1990	1990-2015	All Crops	Default	Forest	2009	816.189	816.189
Adaptive	nrms	1990	1990-2015	All Crops	Default	Forest	2010	814.349	814.349
Adaptive	nrms	1990	1990-2015	All Crops	Default	Forest	2011	823.052	823.052
Adaptive	nrms	1990	1990-2015	All Crops	Default	Forest	2012	826.643	826.643
Adaptive	nrms	1990	1990-2015	All Crops	Default	Forest	2013	832.385	832.385
Adaptive	nrms	1990	1990-2015	All Crops	Default	Forest	2014	844.449	844.449
Adaptive	nrms	1990	1990-2015	All Crops	Default	Forest	2015	856.613	856.613
Linear	nrms	1990	1990-2015	All Crops	Default	UrbanLand	1990	116.34	NA
Linear	nrms	1990	1990-2015	All Crops	Default	UrbanLand	1991	116.34	NA
Linear	nrms	1990	1990-2015	All Crops	Default	UrbanLand	1992	116.34	NA
Linear	nrms	1990	1990-2015	All Crops	Default	UrbanLand	1993	116.34	NA
Linear	nrms	1990	1990-2015	All Crops	Default	UrbanLand	1994	116.34	NA
Linear	nrms	1990	1990-2015	All Crops	Default	UrbanLand	1995	116.34	NA
Linear	nrms	1990	1990-2015	All Crops	Default	UrbanLand	1996	116.34	NA
Linear	nrms	1990	1990-2015	All Crops	Default	UrbanLand	1997	116.34	NA
Linear	nrms	1990	1990-2015	All Crops	Default	UrbanLand	1998	116.34	NA
Linear	nrms	1990	1990-2015	All Crops	Default	UrbanLand	1999	116.34	NA
Linear	nrms	1990	1990-2015	All Crops	Default	UrbanLand	2000	116.34	NA
Linear	nrms	1990	1990-2015	All Crops	Default	UrbanLand	2001	116.34	NA
Linear	nrms	1990	1990-2015	All Crops	Default	UrbanLand	2002	116.34	NA
Linear	nrms	1990	1990-2015	All Crops	Default	UrbanLand	2003	116.34	NA
Linear	nrms	1990	1990-2015	All Crops	Default	UrbanLand	2004	116.34	NA
Linear	nrms	1990	1990-2015	All Crops	Default	UrbanLand	2005	116.34	NA
Linear	nrms	1990	1990-2015	All Crops	Default	UrbanLand	2006	116.34	NA
Linear	nrms	1990	1990-2015	All Crops	Default	UrbanLand	2007	116.34	NA
Linear	nrms	1990	1990-2015	All Crops	Default	UrbanLand	2008	116.34	NA
Linear	nrms	1990	1990-2015	All Crops	Default	UrbanLand	2009	116.34	NA
Linear	nrms	1990	1990-2015	All Crops	Default	UrbanLand	2010	116.34	NA
Linear	nrms	1990	1990-2015	All Crops	Default	UrbanLand	2011	116.34	NA
Linear	nrms	1990	1990-2015	All Crops	Default	UrbanLand	2012	116.34	NA
Linear	nrms	1990	1990-2015	All Crops	Default	UrbanLand	2013	116.34	NA
Linear	nrms	1990	1990-2015	All Crops	Default	UrbanLand	2014	116.34	NA
Linear	nrms	1990	1990-2015	All Crops	Default	UrbanLand	2015	116.34	NA
Linear	nrms	1990	1990-2015	All Crops	Default	Tundra	1990	240.732	NA
Linear	nrms	1990	1990-2015	All Crops	Default	Tundra	1991	240.732	NA
Linear	nrms	1990	1990-2015	All Crops	Default	Tundra	1992	240.732	NA
Linear	nrms	1990	1990-2015	All Crops	Default	Tundra	1993	240.732	NA
Linear	nrms	1990	1990-2015	All Crops	Default	Tundra	1994	240.732	NA
Linear	nrms	1990	1990-2015	All Crops	Default	Tundra	1995	240.732	NA
Linear	nrms	1990	1990-2015	All Crops	Default	Tundra	1996	240.732	NA
Linear	nrms	1990	1990-2015	All Crops	Default	Tundra	1997	240.732	NA
Linear	nrms	1990	1990-2015	All Crops	Default	Tundra	1998	240.732	NA
Linear	nrms	1990	1990-2015	All Crops	Default	Tundra	1999	240.732	NA
Linear	nrms	1990	1990-2015	All Crops	Default	Tundra	2000	240.732	NA
Linear	nrms	1990	1990-2015	All Crops	Default	Tundra	2001	240.732	NA
Linear	nrms	1990	1990-2015	All Crops	Default	Tundra	2002	240.732	NA
Linear	nrms	1990	1990-2015	All Crops	Default	Tundra	2003	240.732	NA
Linear	nrms	1990	1990-2015	All Crops	Default	Tundra	2004	240.732	NA
Linear	nrms	1990	1990-2015	All Crops	Default	Tundra	2005	240.732	NA
Linear	nrms	1990	1990-2015	All Crops	Default	Tundra	2006	240.732	NA
Linear	nrms	1990	1990-2015	All Crops	Default	Tundra	2007	240.732	NA
Linear	nrms	1990	1990-2015	All Crops	Default	Tundra	2008	240.732	NA
Linear	nrms	1990	1990-2015	All Crops	Default	Tundra	2009	240.732	NA
Linear	nrms	1990	1990-2015	All Crops	Default	Tundra	2010	240.732	NA
Linear	nrms	1990	1990-2015	All Crops	Default	Tundra	2011	240.732	NA
Linear	nrms	1990	1990-2015	All Crops	Default	Tundra	2012	240.732	NA
Linear	nrms	1990	1990-2015	All Crops	Default	Tundra	2013	240.732	NA
Linear	nrms	1990	1990-2015	All Crops	Default	Tundra	2014	240.732	NA
Linear	nrms	1990	1990-2015	All Crops	Default	Tundra	2015	240.732	NA
Linear	nrms	1990	1990-2015	All Crops	Default	RockIceDesert	1990	34.1785	NA
Linear	nrms	1990	1990-2015	All Crops	Default	RockIceDesert	1991	34.1785	NA
Linear	nrms	1990	1990-2015	All Crops	Default	RockIceDesert	1992	34.1785	NA
Linear	nrms	1990	1990-2015	All Crops	Default	RockIceDesert	1993	34.1785	NA
Linear	nrms	1990	1990-2015	All Crops	Default	RockIceDesert	1994	34.1785	NA
Linear	nrms	1990	1990-2015	All Crops	Default	RockIceDesert	1995	34.1785	NA
Linear	nrms	1990	1990-2015	All Crops	Default	RockIceDesert	1996	34.1785	NA
Linear	nrms	1990	1990-2015	All Crops	Default	RockIceDesert	1997	34.1785	NA
Linear	nrms	1990	1990-2015	All Crops	Default	RockIceDesert	1998	34.1785	NA
Linear	nrms	1990	1990-2015	All Crops	Default	RockIceDesert	1999	34.1785	NA
Linear	nrms	1990	1990-2015	All Crops	Default	RockIceDesert	2000	34.1785	NA
Linear	nrms	1990	1990-2015	All Crops	Default	RockIceDesert	2001	34.1785	NA
Linear	nrms	1990	1990-2015	All Crops	Default	RockIceDesert	2002	34.1785	NA
Linear	nrms	1990	1990-2015	All Crops	Default	RockIceDesert	2003	34.1785	NA
Linear	nrms	1990	1990-2015	All Crops	Default	RockIceDesert	2004	34.1785	NA
Linear	nrms	1990	1990-2015	All Crops	Default	RockIceDesert	2005	34.1785	NA
Linear	nrms	1990	1990-2015	All Crops	Default	RockIceDesert	2006	34.1785	NA
Linear	nrms	1990	1990-2015	All Crops	Default	RockIceDesert	2007	34.1785	NA
Linear	nrms	1990	1990-2015	All Crops	Default	RockIceDesert	2008	34.1785	NA
Linear	nrms	1990	1990-2015	All Crops	Default	RockIceDesert	2009	34.1785	NA
Linear	nrms	1990	1990-2015	All Crops	Default	RockIceDesert	2010	34.1785	NA
Linear	nrms	1990	1990-2015	All Crops	Default	RockIceDesert	2011	34.1785	NA
Linear	nrms	1990	1990-2015	All Crops	Default	RockIceDesert	2012	34.1785	NA
Linear	nrms	1990	1990-2015	All Crops	Default	RockIceDesert	2013	34.1785	NA
Linear	nrms	1990	1990-2015	All Crops	Default	RockIceDesert	2014	34.1785	NA
Linear	nrms	1990	1990-2015	All Crops	Default	RockIceDesert	2015	34.1785	NA
Linear	nrms	1990	1990-2015	All Crops	Default	UnmanagedPasture	1990	2313.1	NA
Linear	nrms	1990	1990-2015	All Crops	Default	UnmanagedPasture	1991	2307.34	NA
Linear	nrms	1990	1990-2015	All Crops	Default	UnmanagedPasture	1992	2301.77	NA
Linear	nrms	1990	1990-2015	All Crops	Default	UnmanagedPasture	1993	2276.12	NA
Linear	nrms	1990	1990-2015	All Crops	Default	UnmanagedPasture	1994	2227.88	NA
Linear	nrms	1990	1990-2015	All Crops	Default	UnmanagedPasture	1995	2207.66	NA
Linear	nrms	1990	1990-2015	All Crops	Default	UnmanagedPasture	1996	2182.88	NA
Linear	nrms	1990	1990-2015	All Crops	Default	UnmanagedPasture	1997	2148.34	NA
Linear	nrms	1990	1990-2015	All Crops	Default	UnmanagedPasture	1998	2160.59	NA
Linear	nrms	1990	1990-2015	All Crops	Default	UnmanagedPasture	1999	2241.05	NA
Linear	nrms	1990	1990-2015	All Crops	Default	UnmanagedPasture	2000	2298.52	NA
Linear	nrms	1990	1990-2015	All Crops	Default	UnmanagedPasture	2001	2321.7	NA
Linear	nrms	1990	1990-2015	All Crops	Default	UnmanagedPasture	2002	2324.9	NA
Linear	nrms	1990	1990-2015	All Crops	Default	UnmanagedPasture	2003	2363.45	NA
Linear	nrms	1990	1990-2015	All Crops	Default	UnmanagedPasture	2004	2336.12	NA
Linear	nrms	1990	1990-2015	All Crops	Default	UnmanagedPasture	2005	2319.44	NA
Linear	nrms	1990	1990-2015	All Crops	Default	UnmanagedPasture	2006	2328.11	NA
Linear	nrms	1990	1990-2015	All Crops	Default	UnmanagedPasture	2007	2315.13	NA
Linear	nrms	1990	1990-2015	All Crops	Default	UnmanagedPasture	2008	2305.28	NA
Linear	nrms	1990	1990-2015	All Crops	Default	UnmanagedPasture	2009	2247.15	NA
Linear	nrms	1990	1990-2015	All Crops	Default	UnmanagedPasture	2010	2245	NA
Linear	nrms	1990	1990-2015	All Crops	Default	UnmanagedPasture	2011	2241.2	NA
Linear	nrms	1990	1990-2015	All Crops	Default	UnmanagedPasture	2012	2186.29	NA
Linear	nrms	1990	1990-2015	All Crops	Default	UnmanagedPasture	2013	2146.27	NA
Linear	nrms	1990	1990-2015	All Crops	Default	UnmanagedPasture	2014	2125.32	NA
Linear	nrms	1990	1990-2015	All Crops	Default	UnmanagedPasture	2015	2108.06	NA
Linear	nrms	1990	1990-2015	All Crops	Default	Pasture	1990	67.8453	67.8453
Linear	nrms	1990	1990-2015	All Crops	Default	Pasture	1991	67.6764	67.6764
Linear	nrms	1990	1990-2015	All Crops	Default	Pasture	1992	67.513	67.513
Linear	nrms	1990	1990-2015	All Crops	Default	Pasture	1993	66.7606	66.7606
Linear	nrms	1990	1990-2015	All Crops	Default	Pasture	1994	65.3456	65.3456
Linear	nrms	1990	1990-2015	All Crops	Default	Pasture	1995	64.7524	64.7524
Linear	nrms	1990	1990-2015	All Crops	Default	Pasture	1996	64.0258	64.0258
Linear	nrms	1990	1990-2015	All Crops	Default	Pasture	1997	63.0126	63.0126
Linear	nrms	1990	1990-2015	All Crops	Default	Pasture	1998	63.372	63.372
Linear	nrms	1990	1990-2015	All Crops	Default	Pasture	1999	65.7318	65.7318
Linear	nrms	1990	1990-2015	All Crops	Default	Pasture	2000	67.4174	67.4174
Linear	nrms	1990	1990-2015	All Crops	Default	Pasture	2001	68.0975	68.0975
Linear	nrms	1990	1990-2015	All Crops	Default	Pasture	2002	68.1914	68.1914
Linear	nrms	1990	1990-2015	All Crops	Default	Pasture	2003	69.3221	69.3221
Linear	nrms	1990	1990-2015	All Crops	Default	Pasture	2004	68.5204	68.5204
Linear	nrms	1990	1990-2015	All Crops	Default	Pasture	2005	68.0312	68.0312
Linear	nrms	1990	1990-2015	All Crops	Default	Pasture	2006	68.2853	68.2853
Linear	nrms	1990	1990-2015	All Crops	Default	Pasture	2007	67.9048	67.9048
Linear	nrms	1990	1990-2015	All Crops	Default	Pasture	2008	67.6158	67.6158
Linear	nrms	1990	1990-2015	All Crops	Default	Pasture	2009	65.9108	65.9108
Linear	nrms	1990	1990-2015	All Crops	Default	Pasture	2010	65.8478	65.8478
Linear	nrms	1990	1990-2015	All Crops	Default	Pasture	2011	65.7364	65.7364
Linear	nrms	1990	1990-2015	All Crops	Default	Pasture	2012	64.1257	64.1257
Linear	nrms	1990	1990-2015	All Crops	Default	Pasture	2013	62.952	62.952
Linear	nrms	1990	1990-2015	All Crops	Default	Pasture	2014	62.3374	62.3374
Linear	nrms	1990	1990-2015	All Crops	Default	Pasture	2015	61.8311	61.8311
Linear	nrms	1990	1990-2015	All Crops	Default	Shrubland	1990	742.798	NA
Linear	nrms	1990	1990-2015	All Crops	Default	Shrubland	1991	742.235	NA
Linear	nrms	1990	1990-2015	All Crops	Default	Shrubland	1992	741.688	NA
Linear	nrms	1990	1990-2015	All Crops	Default	Shrubland	1993	739.143	NA
Linear	nrms	1990	1990-2015	All Crops	Default	Shrubland	1994	734.236	NA
Linear	nrms	1990	1990-2015	All Crops	Default	Shrubland	1995	732.131	NA
Linear	nrms	1990	1990-2015	All Crops	Default	Shrubland	1996	729.514	NA
Linear	nrms	1990	1990-2015	All Crops	Default	Shrubland	1997	725.793	NA
Linear	nrms	1990	1990-2015	All Crops	Default	Shrubland	1998	727.122	NA
Linear	nrms	1990	1990-2015	All Crops	Default	Shrubland	1999	735.591	NA
Linear	nrms	1990	1990-2015	All Crops	Default	Shrubland	2000	741.367	NA
Linear	nrms	1990	1990-2015	All Crops	Default	Shrubland	2001	743.634	NA
Linear	nrms	1990	1990-2015	All Crops	Default	Shrubland	2002	743.945	NA
Linear	nrms	1990	1990-2015	All Crops	Default	Shrubland	2003	747.627	NA
Linear	nrms	1990	1990-2015	All Crops	Default	Shrubland	2004	745.026	NA
Linear	nrms	1990	1990-2015	All Crops	Default	Shrubland	2005	743.415	NA
Linear	nrms	1990	1990-2015	All Crops	Default	Shrubland	2006	744.254	NA
Linear	nrms	1990	1990-2015	All Crops	Default	Shrubland	2007	742.996	NA
Linear	nrms	1990	1990-2015	All Crops	Default	Shrubland	2008	742.032	NA
Linear	nrms	1990	1990-2015	All Crops	Default	Shrubland	2009	736.215	NA
Linear	nrms	1990	1990-2015	All Crops	Default	Shrubland	2010	735.996	NA
Linear	nrms	1990	1990-2015	All Crops	Default	Shrubland	2011	735.607	NA
Linear	nrms	1990	1990-2015	All Crops	Default	Shrubland	2012	729.877	NA
Linear	nrms	1990	1990-2015	All Crops	Default	Shrubland	2013	725.567	NA
Linear	nrms	1990	1990-2015	All Crops	Default	Shrubland	2014	723.266	NA
Linear	nrms	1990	1990-2015	All Crops	Default	Shrubland	2015	721.345	NA
Linear	nrms	1990	1990-2015	All Crops	Default	Grassland	1990	588.538	NA
Linear	nrms	1990	1990-2015	All Crops	Default	Grassland	1991	588.092	NA
Linear	nrms	1990	1990-2015	All Crops	Default	Grassland	1992	587.659	NA
Linear	nrms	1990	1990-2015	All Crops	Default	Grassland	1993	585.642	NA
Linear	nrms	1990	1990-2015	All Crops	Default	Grassland	1994	581.754	NA
Linear	nrms	1990	1990-2015	All Crops	Default	Grassland	1995	580.086	NA
Linear	nrms	1990	1990-2015	All Crops	Default	Grassland	1996	578.013	NA
Linear	nrms	1990	1990-2015	All Crops	Default	Grassland	1997	575.064	NA
Linear	nrms	1990	1990-2015	All Crops	Default	Grassland	1998	576.118	NA
Linear	nrms	1990	1990-2015	All Crops	Default	Grassland	1999	582.828	NA
Linear	nrms	1990	1990-2015	All Crops	Default	Grassland	2000	587.404	NA
Linear	nrms	1990	1990-2015	All Crops	Default	Grassland	2001	589.201	NA
Linear	nrms	1990	1990-2015	All Crops	Default	Grassland	2002	589.447	NA
Linear	nrms	1990	1990-2015	All Crops	Default	Grassland	2003	592.365	NA
Linear	nrms	1990	1990-2015	All Crops	Default	Grassland	2004	590.304	NA
Linear	nrms	1990	1990-2015	All Crops	Default	Grassland	2005	589.027	NA
Linear	nrms	1990	1990-2015	All Crops	Default	Grassland	2006	589.692	NA
Linear	nrms	1990	1990-2015	All Crops	Default	Grassland	2007	588.695	NA
Linear	nrms	1990	1990-2015	All Crops	Default	Grassland	2008	587.931	NA
Linear	nrms	1990	1990-2015	All Crops	Default	Grassland	2009	583.322	NA
Linear	nrms	1990	1990-2015	All Crops	Default	Grassland	2010	583.149	NA
Linear	nrms	1990	1990-2015	All Crops	Default	Grassland	2011	582.841	NA
Linear	nrms	1990	1990-2015	All Crops	Default	Grassland	2012	578.3	NA
Linear	nrms	1990	1990-2015	All Crops	Default	Grassland	2013	574.886	NA
Linear	nrms	1990	1990-2015	All Crops	Default	Grassland	2014	573.062	NA
Linear	nrms	1990	1990-2015	All Crops	Default	Grassland	2015	571.541	NA
Linear	nrms	1990	1990-2015	All Crops	Default	OtherArableLand	1990	685.461	NA
Linear	nrms	1990	1990-2015	All Crops	Default	OtherArableLand	1991	678.622	NA
Linear	nrms	1990	1990-2015	All Crops	Default	OtherArableLand	1992	683.253	NA
Linear	nrms	1990	1990-2015	All Crops	Default	OtherArableLand	1993	690.911	NA
Linear	nrms	1990	1990-2015	All Crops	Default	OtherArableLand	1994	684.103	NA
Linear	nrms	1990	1990-2015	All Crops	Default	OtherArableLand	1995	675.41	NA
Linear	nrms	1990	1990-2015	All Crops	Default	OtherArableLand	1996	680.562	NA
Linear	nrms	1990	1990-2015	All Crops	Default	OtherArableLand	1997	698.795	NA
Linear	nrms	1990	1990-2015	All Crops	Default	OtherArableLand	1998	711.366	NA
Linear	nrms	1990	1990-2015	All Crops	Default	OtherArableLand	1999	720.391	NA
Linear	nrms	1990	1990-2015	All Crops	Default	OtherArableLand	2000	721.579	NA
Linear	nrms	1990	1990-2015	All Crops	Default	OtherArableLand	2001	714.142	NA
Linear	nrms	1990	1990-2015	All Crops	Default	OtherArableLand	2002	714.337	NA
Linear	nrms	1990	1990-2015	All Crops	Default	OtherArableLand	2003	694.893	NA
Linear	nrms	1990	1990-2015	All Crops	Default	OtherArableLand	2004	703.57	NA
Linear	nrms	1990	1990-2015	All Crops	Default	OtherArableLand	2005	698.012	NA
Linear	nrms	1990	1990-2015	All Crops	Default	OtherArableLand	2006	687.386	NA
Linear	nrms	1990	1990-2015	All Crops	Default	OtherArableLand	2007	688.271	NA
Linear	nrms	1990	1990-2015	All Crops	Default	OtherArableLand	2008	682.828	NA
Linear	nrms	1990	1990-2015	All Crops	Default	OtherArableLand	2009	713.994	NA
Linear	nrms	1990	1990-2015	All Crops	Default	OtherArableLand	2010	727.514	NA
Linear	nrms	1990	1990-2015	All Crops	Default	OtherArableLand	2011	722.904	NA
Linear	nrms	1990	1990-2015	All Crops	Default	OtherArableLand	2012	744.615	NA
Linear	nrms	1990	1990-2015	All Crops	Default	OtherArableLand	2013	760.25	NA
Linear	nrms	1990	1990-2015	All Crops	Default	OtherArableLand	2014	768.499	NA
Linear	nrms	1990	1990-2015	All Crops	Default	OtherArableLand	2015	773.422	NA
Linear	nrms	1990	1990-2015	All Crops	Default	Wheat	1990	266.987	279.65
Linear	nrms	1990	1990-2015	All Crops	Default	Wheat	1991	260.167	272.506
Linear	nrms	1990	1990-2015	All Crops	Default	Wheat	1992	263.635	276.138
Linear	nrms	1990	1990-2015	All Crops	Default	Wheat	1993	269.223	281.991
Linear	nrms	1990	1990-2015	All Crops	Default	Wheat	1994	267.01	279.674
Linear	nrms	1990	1990-2015	All Crops	Default	Wheat	1995	262.812	275.276
Linear	nrms	1990	1990-2015	All Crops	Default	Wheat	1996	264.821	277.38
Linear	nrms	1990	1990-2015	All Crops	Default	Wheat	1997	273.685	286.665
Linear	nrms	1990	1990-2015	All Crops	Default	Wheat	1998	281.017	294.345
Linear	nrms	1990	1990-2015	All Crops	Default	Wheat	1999	285.127	298.65
Linear	nrms	1990	1990-2015	All Crops	Default	Wheat	2000	285.001	298.518
Linear	nrms	1990	1990-2015	All Crops	Default	Wheat	2001	280.886	294.207
Linear	nrms	1990	1990-2015	All Crops	Default	Wheat	2002	281.719	295.08
Linear	nrms	1990	1990-2015	All Crops	Default	Wheat	2003	273.151	286.106
Linear	nrms	1990	1990-2015	All Crops	Default	Wheat	2004	276.484	289.597
Linear	nrms	1990	1990-2015	All Crops	Default	Wheat	2005	272.632	285.562
Linear	nrms	1990	1990-2015	All Crops	Default	Wheat	2006	266.925	279.584
Linear	nrms	1990	1990-2015	All Crops	Default	Wheat	2007	267.675	280.371
Linear	nrms	1990	1990-2015	All Crops	Default	Wheat	2008	264.854	277.416
Linear	nrms	1990	1990-2015	All Crops	Default	Wheat	2009	281.562	294.916
Linear	nrms	1990	1990-2015	All Crops	Default	Wheat	2010	288.188	301.856
Linear	nrms	1990	1990-2015	All Crops	Default	Wheat	2011	285.918	299.478
Linear	nrms	1990	1990-2015	All Crops	Default	Wheat	2012	296.132	310.177
Linear	nrms	1990	1990-2015	All Crops	Default	Wheat	2013	304.173	318.599
Linear	nrms	1990	1990-2015	All Crops	Default	Wheat	2014	308.95	323.603
Linear	nrms	1990	1990-2015	All Crops	Default	Wheat	2015	312.015	326.813
Linear	nrms	1990	1990-2015	All Crops	Default	SugarCrop	1990	8.60991	8.97046
Linear	nrms	1990	1990-2015	All Crops	Default	SugarCrop	1991	8.53907	8.89665
Linear	nrms	1990	1990-2015	All Crops	Default	SugarCrop	1992	8.57519	8.93428
Linear	nrms	1990	1990-2015	All Crops	Default	SugarCrop	1993	8.6368	8.99848
Linear	nrms	1990	1990-2015	All Crops	Default	SugarCrop	1994	8.4999	8.85584
Linear	nrms	1990	1990-2015	All Crops	Default	SugarCrop	1995	8.36225	8.71243
Linear	nrms	1990	1990-2015	All Crops	Default	SugarCrop	1996	8.41357	8.76589
Linear	nrms	1990	1990-2015	All Crops	Default	SugarCrop	1997	8.68111	9.04464
Linear	nrms	1990	1990-2015	All Crops	Default	SugarCrop	1998	8.87384	9.24544
Linear	nrms	1990	1990-2015	All Crops	Default	SugarCrop	1999	8.98802	9.3644
Linear	nrms	1990	1990-2015	All Crops	Default	SugarCrop	2000	8.99346	9.37008
Linear	nrms	1990	1990-2015	All Crops	Default	SugarCrop	2001	8.88961	9.26187
Linear	nrms	1990	1990-2015	All Crops	Default	SugarCrop	2002	8.89533	9.26783
Linear	nrms	1990	1990-2015	All Crops	Default	SugarCrop	2003	8.64015	9.00197
Linear	nrms	1990	1990-2015	All Crops	Default	SugarCrop	2004	8.78074	9.14845
Linear	nrms	1990	1990-2015	All Crops	Default	SugarCrop	2005	8.69876	9.06303
Linear	nrms	1990	1990-2015	All Crops	Default	SugarCrop	2006	8.56021	8.91868
Linear	nrms	1990	1990-2015	All Crops	Default	SugarCrop	2007	8.58449	8.94398
Linear	nrms	1990	1990-2015	All Crops	Default	SugarCrop	2008	8.50452	8.86066
Linear	nrms	1990	1990-2015	All Crops	Default	SugarCrop	2009	8.89476	9.26724
Linear	nrms	1990	1990-2015	All Crops	Default	SugarCrop	2010	9.08436	9.46478
Linear	nrms	1990	1990-2015	All Crops	Default	SugarCrop	2011	9.10415	9.4854
Linear	nrms	1990	1990-2015	All Crops	Default	SugarCrop	2012	9.41143	9.80554
Linear	nrms	1990	1990-2015	All Crops	Default	SugarCrop	2013	9.62763	10.0308
Linear	nrms	1990	1990-2015	All Crops	Default	SugarCrop	2014	9.69265	10.0985
Linear	nrms	1990	1990-2015	All Crops	Default	SugarCrop	2015	9.69095	10.0968
Linear	nrms	1990	1990-2015	All Crops	Default	Root_Tuber	1990	5.74808	5.9508
Linear	nrms	1990	1990-2015	All Crops	Default	Root_Tuber	1991	5.73111	5.93324
Linear	nrms	1990	1990-2015	All Crops	Default	Root_Tuber	1992	5.77999	5.98384
Linear	nrms	1990	1990-2015	All Crops	Default	Root_Tuber	1993	5.82897	6.03455
Linear	nrms	1990	1990-2015	All Crops	Default	Root_Tuber	1994	5.77742	5.98118
Linear	nrms	1990	1990-2015	All Crops	Default	Root_Tuber	1995	5.66438	5.86416
Linear	nrms	1990	1990-2015	All Crops	Default	Root_Tuber	1996	5.72549	5.92741
Linear	nrms	1990	1990-2015	All Crops	Default	Root_Tuber	1997	5.86914	6.07614
Linear	nrms	1990	1990-2015	All Crops	Default	Root_Tuber	1998	5.97848	6.18933
Linear	nrms	1990	1990-2015	All Crops	Default	Root_Tuber	1999	6.0284	6.24101
Linear	nrms	1990	1990-2015	All Crops	Default	Root_Tuber	2000	6.03292	6.24569
Linear	nrms	1990	1990-2015	All Crops	Default	Root_Tuber	2001	5.95746	6.16757
Linear	nrms	1990	1990-2015	All Crops	Default	Root_Tuber	2002	5.99669	6.20818
Linear	nrms	1990	1990-2015	All Crops	Default	Root_Tuber	2003	5.86837	6.07533
Linear	nrms	1990	1990-2015	All Crops	Default	Root_Tuber	2004	5.92626	6.13527
Linear	nrms	1990	1990-2015	All Crops	Default	Root_Tuber	2005	5.86587	6.07275
Linear	nrms	1990	1990-2015	All Crops	Default	Root_Tuber	2006	5.78977	5.99396
Linear	nrms	1990	1990-2015	All Crops	Default	Root_Tuber	2007	5.81069	6.01562
Linear	nrms	1990	1990-2015	All Crops	Default	Root_Tuber	2008	5.7615	5.96469
Linear	nrms	1990	1990-2015	All Crops	Default	Root_Tuber	2009	6.06942	6.28348
Linear	nrms	1990	1990-2015	All Crops	Default	Root_Tuber	2010	6.20162	6.42034
Linear	nrms	1990	1990-2015	All Crops	Default	Root_Tuber	2011	6.17302	6.39072
Linear	nrms	1990	1990-2015	All Crops	Default	Root_Tuber	2012	6.35538	6.57952
Linear	nrms	1990	1990-2015	All Crops	Default	Root_Tuber	2013	6.47604	6.70443
Linear	nrms	1990	1990-2015	All Crops	Default	Root_Tuber	2014	6.55246	6.78355
Linear	nrms	1990	1990-2015	All Crops	Default	Root_Tuber	2015	6.57986	6.81192
Linear	nrms	1990	1990-2015	All Crops	Default	Rice	1990	11.379	11.424
Linear	nrms	1990	1990-2015	All Crops	Default	Rice	1991	11.3769	11.4219
Linear	nrms	1990	1990-2015	All Crops	Default	Rice	1992	11.6222	11.6682
Linear	nrms	1990	1990-2015	All Crops	Default	Rice	1993	11.7304	11.7769
Linear	nrms	1990	1990-2015	All Crops	Default	Rice	1994	11.5301	11.5758
Linear	nrms	1990	1990-2015	All Crops	Default	Rice	1995	11.3796	11.4246
Linear	nrms	1990	1990-2015	All Crops	Default	Rice	1996	11.5341	11.5797
Linear	nrms	1990	1990-2015	All Crops	Default	Rice	1997	11.9398	11.9871
Linear	nrms	1990	1990-2015	All Crops	Default	Rice	1998	12.2184	12.2668
Linear	nrms	1990	1990-2015	All Crops	Default	Rice	1999	12.3734	12.4224
Linear	nrms	1990	1990-2015	All Crops	Default	Rice	2000	12.2984	12.3471
Linear	nrms	1990	1990-2015	All Crops	Default	Rice	2001	12.0053	12.0528
Linear	nrms	1990	1990-2015	All Crops	Default	Rice	2002	10.961	11.0044
Linear	nrms	1990	1990-2015	All Crops	Default	Rice	2003	6.36409	6.38927
Linear	nrms	1990	1990-2015	All Crops	Default	Rice	2004	10.2026	10.243
Linear	nrms	1990	1990-2015	All Crops	Default	Rice	2005	11.5406	11.5863
Linear	nrms	1990	1990-2015	All Crops	Default	Rice	2006	11.6381	11.6842
Linear	nrms	1990	1990-2015	All Crops	Default	Rice	2007	11.7679	11.8145
Linear	nrms	1990	1990-2015	All Crops	Default	Rice	2008	11.77	11.8165
Linear	nrms	1990	1990-2015	All Crops	Default	Rice	2009	12.4384	12.4877
Linear	nrms	1990	1990-2015	All Crops	Default	Rice	2010	12.685	12.7352
Linear	nrms	1990	1990-2015	All Crops	Default	Rice	2011	12.5563	12.606
Linear	nrms	1990	1990-2015	All Crops	Default	Rice	2012	12.9242	12.9754
Linear	nrms	1990	1990-2015	All Crops	Default	Rice	2013	13.1337	13.1857
Linear	nrms	1990	1990-2015	All Crops	Default	Rice	2014	13.275	13.3275
Linear	nrms	1990	1990-2015	All Crops	Default	Rice	2015	13.3235	13.3762
Linear	nrms	1990	1990-2015	All Crops	Default	PalmFruit	1990	0	0
Linear	nrms	1990	1990-2015	All Crops	Default	PalmFruit	1991	0	0
Linear	nrms	1990	1990-2015	All Crops	Default	PalmFruit	1992	0	0
Linear	nrms	1990	1990-2015	All Crops	Default	PalmFruit	1993	0	0
Linear	nrms	1990	1990-2015	All Crops	Default	PalmFruit	1994	0	0
Linear	nrms	1990	1990-2015	All Crops	Default	PalmFruit	1995	0	0
Linear	nrms	1990	1990-2015	All Crops	Default	PalmFruit	1996	0	0
Linear	nrms	1990	1990-2015	All Crops	Default	PalmFruit	1997	0	0
Linear	nrms	1990	1990-2015	All Crops	Default	PalmFruit	1998	0	0
Linear	nrms	1990	1990-2015	All Crops	Default	PalmFruit	1999	0	0
Linear	nrms	1990	1990-2015	All Crops	Default	PalmFruit	2000	0	0
Linear	nrms	1990	1990-2015	All Crops	Default	PalmFruit	2001	0	0
Linear	nrms	1990	1990-2015	All Crops	Default	PalmFruit	2002	0	0
Linear	nrms	1990	1990-2015	All Crops	Default	PalmFruit	2003	0	0
Linear	nrms	1990	1990-2015	All Crops	Default	PalmFruit	2004	0	0
Linear	nrms	1990	1990-2015	All Crops	Default	PalmFruit	2005	0	0
Linear	nrms	1990	1990-2015	All Crops	Default	PalmFruit	2006	0	0
Linear	nrms	1990	1990-2015	All Crops	Default	PalmFruit	2007	0	0
Linear	nrms	1990	1990-2015	All Crops	Default	PalmFruit	2008	0	0
Linear	nrms	1990	1990-2015	All Crops	Default	PalmFruit	2009	0	0
Linear	nrms	1990	1990-2015	All Crops	Default	PalmFruit	2010	0	0
Linear	nrms	1990	1990-2015	All Crops	Default	PalmFruit	2011	0	0
Linear	nrms	1990	1990-2015	All Crops	Default	PalmFruit	2012	0	0
Linear	nrms	1990	1990-2015	All Crops	Default	PalmFruit	2013	0	0
Linear	nrms	1990	1990-2015	All Crops	Default	PalmFruit	2014	0	0
Linear	nrms	1990	1990-2015	All Crops	Default	PalmFruit	2015	0	0
Linear	nrms	1990	1990-2015	All Crops	Default	OtherGrain	1990	91.0264	94.978
Linear	nrms	1990	1990-2015	All Crops	Default	OtherGrain	1991	89.0059	92.8697
Linear	nrms	1990	1990-2015	All Crops	Default	OtherGrain	1992	88.922	92.7823
Linear	nrms	1990	1990-2015	All Crops	Default	OtherGrain	1993	90.8959	94.8418
Linear	nrms	1990	1990-2015	All Crops	Default	OtherGrain	1994	90.3018	94.2219
Linear	nrms	1990	1990-2015	All Crops	Default	OtherGrain	1995	88.5722	92.4173
Linear	nrms	1990	1990-2015	All Crops	Default	OtherGrain	1996	89.3439	93.2225
Linear	nrms	1990	1990-2015	All Crops	Default	OtherGrain	1997	92.2691	96.2747
Linear	nrms	1990	1990-2015	All Crops	Default	OtherGrain	1998	94.3949	98.4927
Linear	nrms	1990	1990-2015	All Crops	Default	OtherGrain	1999	95.7322	99.8881
Linear	nrms	1990	1990-2015	All Crops	Default	OtherGrain	2000	95.4401	99.5833
Linear	nrms	1990	1990-2015	All Crops	Default	OtherGrain	2001	93.6053	97.6689
Linear	nrms	1990	1990-2015	All Crops	Default	OtherGrain	2002	94.8506	98.9682
Linear	nrms	1990	1990-2015	All Crops	Default	OtherGrain	2003	92.982	97.0185
Linear	nrms	1990	1990-2015	All Crops	Default	OtherGrain	2004	94.0888	98.1733
Linear	nrms	1990	1990-2015	All Crops	Default	OtherGrain	2005	91.9108	95.9008
Linear	nrms	1990	1990-2015	All Crops	Default	OtherGrain	2006	89.3559	93.2349
Linear	nrms	1990	1990-2015	All Crops	Default	OtherGrain	2007	89.8976	93.8002
Linear	nrms	1990	1990-2015	All Crops	Default	OtherGrain	2008	86.4881	90.2426
Linear	nrms	1990	1990-2015	All Crops	Default	OtherGrain	2009	94.6726	98.7825
Linear	nrms	1990	1990-2015	All Crops	Default	OtherGrain	2010	97.5142	101.747
Linear	nrms	1990	1990-2015	All Crops	Default	OtherGrain	2011	93.1016	97.1433
Linear	nrms	1990	1990-2015	All Crops	Default	OtherGrain	2012	99.5246	103.845
Linear	nrms	1990	1990-2015	All Crops	Default	OtherGrain	2013	102.909	107.377
Linear	nrms	1990	1990-2015	All Crops	Default	OtherGrain	2014	104.774	109.323
Linear	nrms	1990	1990-2015	All Crops	Default	OtherGrain	2015	106.231	110.843
Linear	nrms	1990	1990-2015	All Crops	Default	OilCrop	1990	239.728	245.898
Linear	nrms	1990	1990-2015	All Crops	Default	OilCrop	1991	237.768	243.887
Linear	nrms	1990	1990-2015	All Crops	Default	OilCrop	1992	238.985	245.136
Linear	nrms	1990	1990-2015	All Crops	Default	OilCrop	1993	242.16	248.392
Linear	nrms	1990	1990-2015	All Crops	Default	OilCrop	1994	239.855	246.028
Linear	nrms	1990	1990-2015	All Crops	Default	OilCrop	1995	237.186	243.29
Linear	nrms	1990	1990-2015	All Crops	Default	OilCrop	1996	239.239	245.395
Linear	nrms	1990	1990-2015	All Crops	Default	OilCrop	1997	246.613	252.959
Linear	nrms	1990	1990-2015	All Crops	Default	OilCrop	1998	251.298	257.765
Linear	nrms	1990	1990-2015	All Crops	Default	OilCrop	1999	254.085	260.623
Linear	nrms	1990	1990-2015	All Crops	Default	OilCrop	2000	254.389	260.935
Linear	nrms	1990	1990-2015	All Crops	Default	OilCrop	2001	251.059	257.52
Linear	nrms	1990	1990-2015	All Crops	Default	OilCrop	2002	250.509	256.956
Linear	nrms	1990	1990-2015	All Crops	Default	OilCrop	2003	242.996	249.249
Linear	nrms	1990	1990-2015	All Crops	Default	OilCrop	2004	246.502	252.846
Linear	nrms	1990	1990-2015	All Crops	Default	OilCrop	2005	245.107	251.415
Linear	nrms	1990	1990-2015	All Crops	Default	OilCrop	2006	241.508	247.723
Linear	nrms	1990	1990-2015	All Crops	Default	OilCrop	2007	241.821	248.044
Linear	nrms	1990	1990-2015	All Crops	Default	OilCrop	2008	240.75	246.946
Linear	nrms	1990	1990-2015	All Crops	Default	OilCrop	2009	252.686	259.189
Linear	nrms	1990	1990-2015	All Crops	Default	OilCrop	2010	258.343	264.991
Linear	nrms	1990	1990-2015	All Crops	Default	OilCrop	2011	257.772	264.406
Linear	nrms	1990	1990-2015	All Crops	Default	OilCrop	2012	266.191	273.042
Linear	nrms	1990	1990-2015	All Crops	Default	OilCrop	2013	273.136	280.165
Linear	nrms	1990	1990-2015	All Crops	Default	OilCrop	2014	277.179	284.312
Linear	nrms	1990	1990-2015	All Crops	Default	OilCrop	2015	279.494	286.687
Linear	nrms	1990	1990-2015	All Crops	Default	MiscCrop	1990	37.1549	39.1103
Linear	nrms	1990	1990-2015	All Crops	Default	MiscCrop	1991	36.9738	38.9197
Linear	nrms	1990	1990-2015	All Crops	Default	MiscCrop	1992	37.6426	39.6237
Linear	nrms	1990	1990-2015	All Crops	Default	MiscCrop	1993	38.2144	40.2255
Linear	nrms	1990	1990-2015	All Crops	Default	MiscCrop	1994	37.6906	39.6742
Linear	nrms	1990	1990-2015	All Crops	Default	MiscCrop	1995	36.8829	38.824
Linear	nrms	1990	1990-2015	All Crops	Default	MiscCrop	1996	36.8728	38.8134
Linear	nrms	1990	1990-2015	All Crops	Default	MiscCrop	1997	38.2677	40.2817
Linear	nrms	1990	1990-2015	All Crops	Default	MiscCrop	1998	38.811	40.8536
Linear	nrms	1990	1990-2015	All Crops	Default	MiscCrop	1999	39.7865	41.8805
Linear	nrms	1990	1990-2015	All Crops	Default	MiscCrop	2000	40.062	42.1704
Linear	nrms	1990	1990-2015	All Crops	Default	MiscCrop	2001	39.6919	41.7809
Linear	nrms	1990	1990-2015	All Crops	Default	MiscCrop	2002	39.6255	41.7109
Linear	nrms	1990	1990-2015	All Crops	Default	MiscCrop	2003	38.4364	40.4593
Linear	nrms	1990	1990-2015	All Crops	Default	MiscCrop	2004	39.0445	41.0994
Linear	nrms	1990	1990-2015	All Crops	Default	MiscCrop	2005	38.6568	40.6913
Linear	nrms	1990	1990-2015	All Crops	Default	MiscCrop	2006	38.1249	40.1314
Linear	nrms	1990	1990-2015	All Crops	Default	MiscCrop	2007	38.228	40.2399
Linear	nrms	1990	1990-2015	All Crops	Default	MiscCrop	2008	37.9927	39.9922
Linear	nrms	1990	1990-2015	All Crops	Default	MiscCrop	2009	39.8044	41.8993
Linear	nrms	1990	1990-2015	All Crops	Default	MiscCrop	2010	40.6021	42.739
Linear	nrms	1990	1990-2015	All Crops	Default	MiscCrop	2011	40.3798	42.5049
Linear	nrms	1990	1990-2015	All Crops	Default	MiscCrop	2012	41.6407	43.8322
Linear	nrms	1990	1990-2015	All Crops	Default	MiscCrop	2013	42.4465	44.6805
Linear	nrms	1990	1990-2015	All Crops	Default	MiscCrop	2014	42.9582	45.219
Linear	nrms	1990	1990-2015	All Crops	Default	MiscCrop	2015	43.2593	45.536
Linear	nrms	1990	1990-2015	All Crops	Default	FodderHerb	1990	130.713	135.258
Linear	nrms	1990	1990-2015	All Crops	Default	FodderHerb	1991	129.409	133.908
Linear	nrms	1990	1990-2015	All Crops	Default	FodderHerb	1992	130.292	134.822
Linear	nrms	1990	1990-2015	All Crops	Default	FodderHerb	1993	131.753	136.333
Linear	nrms	1990	1990-2015	All Crops	Default	FodderHerb	1994	130.454	134.99
Linear	nrms	1990	1990-2015	All Crops	Default	FodderHerb	1995	128.797	133.274
Linear	nrms	1990	1990-2015	All Crops	Default	FodderHerb	1996	129.779	134.291
Linear	nrms	1990	1990-2015	All Crops	Default	FodderHerb	1997	133.256	137.889
Linear	nrms	1990	1990-2015	All Crops	Default	FodderHerb	1998	135.653	140.369
Linear	nrms	1990	1990-2015	All Crops	Default	FodderHerb	1999	137.374	142.15
Linear	nrms	1990	1990-2015	All Crops	Default	FodderHerb	2000	137.601	142.385
Linear	nrms	1990	1990-2015	All Crops	Default	FodderHerb	2001	136.183	140.917
Linear	nrms	1990	1990-2015	All Crops	Default	FodderHerb	2002	136.22	140.956
Linear	nrms	1990	1990-2015	All Crops	Default	FodderHerb	2003	132.512	137.119
Linear	nrms	1990	1990-2015	All Crops	Default	FodderHerb	2004	134.167	138.831
Linear	nrms	1990	1990-2015	All Crops	Default	FodderHerb	2005	133.107	137.734
Linear	nrms	1990	1990-2015	All Crops	Default	FodderHerb	2006	131.081	135.638
Linear	nrms	1990	1990-2015	All Crops	Default	FodderHerb	2007	131.249	135.812
Linear	nrms	1990	1990-2015	All Crops	Default	FodderHerb	2008	130.211	134.738
Linear	nrms	1990	1990-2015	All Crops	Default	FodderHerb	2009	136.155	140.888
Linear	nrms	1990	1990-2015	All Crops	Default	FodderHerb	2010	138.733	143.556
Linear	nrms	1990	1990-2015	All Crops	Default	FodderHerb	2011	137.854	142.646
Linear	nrms	1990	1990-2015	All Crops	Default	FodderHerb	2012	141.994	146.93
Linear	nrms	1990	1990-2015	All Crops	Default	FodderHerb	2013	144.975	150.015
Linear	nrms	1990	1990-2015	All Crops	Default	FodderHerb	2014	146.548	151.643
Linear	nrms	1990	1990-2015	All Crops	Default	FodderHerb	2015	147.487	152.614
Linear	nrms	1990	1990-2015	All Crops	Default	FodderGrass	1990	64.4678	65.55
Linear	nrms	1990	1990-2015	All Crops	Default	FodderGrass	1991	63.8245	64.8959
Linear	nrms	1990	1990-2015	All Crops	Default	FodderGrass	1992	64.2601	65.3388
Linear	nrms	1990	1990-2015	All Crops	Default	FodderGrass	1993	64.9804	66.0711
Linear	nrms	1990	1990-2015	All Crops	Default	FodderGrass	1994	64.34	65.4201
Linear	nrms	1990	1990-2015	All Crops	Default	FodderGrass	1995	63.5225	64.5888
Linear	nrms	1990	1990-2015	All Crops	Default	FodderGrass	1996	64.007	65.0815
Linear	nrms	1990	1990-2015	All Crops	Default	FodderGrass	1997	65.7219	66.8251
Linear	nrms	1990	1990-2015	All Crops	Default	FodderGrass	1998	66.9042	68.0273
Linear	nrms	1990	1990-2015	All Crops	Default	FodderGrass	1999	67.7529	68.8903
Linear	nrms	1990	1990-2015	All Crops	Default	FodderGrass	2000	67.8647	69.0039
Linear	nrms	1990	1990-2015	All Crops	Default	FodderGrass	2001	67.1652	68.2927
Linear	nrms	1990	1990-2015	All Crops	Default	FodderGrass	2002	67.1836	68.3114
Linear	nrms	1990	1990-2015	All Crops	Default	FodderGrass	2003	65.3549	66.4519
Linear	nrms	1990	1990-2015	All Crops	Default	FodderGrass	2004	66.171	67.2817
Linear	nrms	1990	1990-2015	All Crops	Default	FodderGrass	2005	65.6482	66.7502
Linear	nrms	1990	1990-2015	All Crops	Default	FodderGrass	2006	64.6489	65.7341
Linear	nrms	1990	1990-2015	All Crops	Default	FodderGrass	2007	64.7321	65.8187
Linear	nrms	1990	1990-2015	All Crops	Default	FodderGrass	2008	64.2202	65.2982
Linear	nrms	1990	1990-2015	All Crops	Default	FodderGrass	2009	67.1514	68.2786
Linear	nrms	1990	1990-2015	All Crops	Default	FodderGrass	2010	68.4229	69.5714
Linear	nrms	1990	1990-2015	All Crops	Default	FodderGrass	2011	67.9893	69.1306
Linear	nrms	1990	1990-2015	All Crops	Default	FodderGrass	2012	70.0312	71.2068
Linear	nrms	1990	1990-2015	All Crops	Default	FodderGrass	2013	71.5017	72.702
Linear	nrms	1990	1990-2015	All Crops	Default	FodderGrass	2014	72.2776	73.4908
Linear	nrms	1990	1990-2015	All Crops	Default	FodderGrass	2015	72.7406	73.9616
Linear	nrms	1990	1990-2015	All Crops	Default	FiberCrop	1990	46.9682	47.48
Linear	nrms	1990	1990-2015	All Crops	Default	FiberCrop	1991	46.7147	47.2238
Linear	nrms	1990	1990-2015	All Crops	Default	FiberCrop	1992	46.6473	47.1556
Linear	nrms	1990	1990-2015	All Crops	Default	FiberCrop	1993	46.6508	47.1592
Linear	nrms	1990	1990-2015	All Crops	Default	FiberCrop	1994	45.6266	46.1238
Linear	nrms	1990	1990-2015	All Crops	Default	FiberCrop	1995	44.663	45.1497
Linear	nrms	1990	1990-2015	All Crops	Default	FiberCrop	1996	45.2645	45.7578
Linear	nrms	1990	1990-2015	All Crops	Default	FiberCrop	1997	47.1734	47.6874
Linear	nrms	1990	1990-2015	All Crops	Default	FiberCrop	1998	48.5492	49.0783
Linear	nrms	1990	1990-2015	All Crops	Default	FiberCrop	1999	49.0269	49.5612
Linear	nrms	1990	1990-2015	All Crops	Default	FiberCrop	2000	48.5875	49.117
Linear	nrms	1990	1990-2015	All Crops	Default	FiberCrop	2001	47.7007	48.2205
Linear	nrms	1990	1990-2015	All Crops	Default	FiberCrop	2002	47.2314	47.7462
Linear	nrms	1990	1990-2015	All Crops	Default	FiberCrop	2003	44.9774	45.4676
Linear	nrms	1990	1990-2015	All Crops	Default	FiberCrop	2004	46.3612	46.8665
Linear	nrms	1990	1990-2015	All Crops	Default	FiberCrop	2005	46.4376	46.9436
Linear	nrms	1990	1990-2015	All Crops	Default	FiberCrop	2006	45.9413	46.442
Linear	nrms	1990	1990-2015	All Crops	Default	FiberCrop	2007	45.4651	45.9605
Linear	nrms	1990	1990-2015	All Crops	Default	FiberCrop	2008	45.9431	46.4438
Linear	nrms	1990	1990-2015	All Crops	Default	FiberCrop	2009	48.4999	49.0285
Linear	nrms	1990	1990-2015	All Crops	Default	FiberCrop	2010	49.2538	49.7905
Linear	nrms	1990	1990-2015	All Crops	Default	FiberCrop	2011	49.1567	49.6924
Linear	nrms	1990	1990-2015	All Crops	Default	FiberCrop	2012	51.181	51.7387
Linear	nrms	1990	1990-2015	All Crops	Default	FiberCrop	2013	52.4991	53.0712
Linear	nrms	1990	1990-2015	All Crops	Default	FiberCrop	2014	53.0358	53.6137
Linear	nrms	1990	1990-2015	All Crops	Default	FiberCrop	2015	53.3176	53.8986
Linear	nrms	1990	1990-2015	All Crops	Default	Corn	1990	267.418	273.719
Linear	nrms	1990	1990-2015	All Crops	Default	Corn	1991	266.863	273.151
Linear	nrms	1990	1990-2015	All Crops	Default	Corn	1992	269.664	276.018
Linear	nrms	1990	1990-2015	All Crops	Default	Corn	1993	272.472	278.892
Linear	nrms	1990	1990-2015	All Crops	Default	Corn	1994	269.046	275.385
Linear	nrms	1990	1990-2015	All Crops	Default	Corn	1995	265.129	271.376
Linear	nrms	1990	1990-2015	All Crops	Default	Corn	1996	269.37	275.717
Linear	nrms	1990	1990-2015	All Crops	Default	Corn	1997	279.659	286.248
Linear	nrms	1990	1990-2015	All Crops	Default	Corn	1998	284.998	291.713
Linear	nrms	1990	1990-2015	All Crops	Default	Corn	1999	288.264	295.056
Linear	nrms	1990	1990-2015	All Crops	Default	Corn	2000	288.787	295.591
Linear	nrms	1990	1990-2015	All Crops	Default	Corn	2001	285.784	292.518
Linear	nrms	1990	1990-2015	All Crops	Default	Corn	2002	286.037	292.776
Linear	nrms	1990	1990-2015	All Crops	Default	Corn	2003	276.729	283.25
Linear	nrms	1990	1990-2015	All Crops	Default	Corn	2004	278.952	285.524
Linear	nrms	1990	1990-2015	All Crops	Default	Corn	2005	276.162	282.669
Linear	nrms	1990	1990-2015	All Crops	Default	Corn	2006	270.114	276.479
Linear	nrms	1990	1990-2015	All Crops	Default	Corn	2007	270.667	277.045
Linear	nrms	1990	1990-2015	All Crops	Default	Corn	2008	268.553	274.88
Linear	nrms	1990	1990-2015	All Crops	Default	Corn	2009	283.152	289.823
Linear	nrms	1990	1990-2015	All Crops	Default	Corn	2010	290.148	296.984
Linear	nrms	1990	1990-2015	All Crops	Default	Corn	2011	289.739	296.566
Linear	nrms	1990	1990-2015	All Crops	Default	Corn	2012	301.519	308.623
Linear	nrms	1990	1990-2015	All Crops	Default	Corn	2013	310.303	317.615
Linear	nrms	1990	1990-2015	All Crops	Default	Corn	2014	314.118	321.52
Linear	nrms	1990	1990-2015	All Crops	Default	Corn	2015	316.304	323.757
Linear	nrms	1990	1990-2015	All Crops	Default	UnmanagedForest	1990	2327.69	NA
Linear	nrms	1990	1990-2015	All Crops	Default	UnmanagedForest	1991	2195.01	NA
Linear	nrms	1990	1990-2015	All Crops	Default	UnmanagedForest	1992	2216.21	NA
Linear	nrms	1990	1990-2015	All Crops	Default	UnmanagedForest	1993	2136.71	NA
Linear	nrms	1990	1990-2015	All Crops	Default	UnmanagedForest	1994	1760.97	NA
Linear	nrms	1990	1990-2015	All Crops	Default	UnmanagedForest	1995	1571.7	NA
Linear	nrms	1990	1990-2015	All Crops	Default	UnmanagedForest	1996	1495.67	NA
Linear	nrms	1990	1990-2015	All Crops	Default	UnmanagedForest	1997	1484.44	NA
Linear	nrms	1990	1990-2015	All Crops	Default	UnmanagedForest	1998	1659.89	NA
Linear	nrms	1990	1990-2015	All Crops	Default	UnmanagedForest	1999	2274.67	NA
Linear	nrms	1990	1990-2015	All Crops	Default	UnmanagedForest	2000	2763.66	NA
Linear	nrms	1990	1990-2015	All Crops	Default	UnmanagedForest	2001	2846.62	NA
Linear	nrms	1990	1990-2015	All Crops	Default	UnmanagedForest	2002	2879.85	NA
Linear	nrms	1990	1990-2015	All Crops	Default	UnmanagedForest	2003	2893.42	NA
Linear	nrms	1990	1990-2015	All Crops	Default	UnmanagedForest	2004	2794.83	NA
Linear	nrms	1990	1990-2015	All Crops	Default	UnmanagedForest	2005	2560.8	NA
Linear	nrms	1990	1990-2015	All Crops	Default	UnmanagedForest	2006	2469.7	NA
Linear	nrms	1990	1990-2015	All Crops	Default	UnmanagedForest	2007	2382.27	NA
Linear	nrms	1990	1990-2015	All Crops	Default	UnmanagedForest	2008	2235.4	NA
Linear	nrms	1990	1990-2015	All Crops	Default	UnmanagedForest	2009	2232.75	NA
Linear	nrms	1990	1990-2015	All Crops	Default	UnmanagedForest	2010	2405.92	NA
Linear	nrms	1990	1990-2015	All Crops	Default	UnmanagedForest	2011	2310.65	NA
Linear	nrms	1990	1990-2015	All Crops	Default	UnmanagedForest	2012	2199.76	NA
Linear	nrms	1990	1990-2015	All Crops	Default	UnmanagedForest	2013	2116.98	NA
Linear	nrms	1990	1990-2015	All Crops	Default	UnmanagedForest	2014	2074.66	NA
Linear	nrms	1990	1990-2015	All Crops	Default	UnmanagedForest	2015	2016.66	NA
Linear	nrms	1990	1990-2015	All Crops	Default	Forest	1990	655.518	655.518
Linear	nrms	1990	1990-2015	All Crops	Default	Forest	1991	815.803	815.803
Linear	nrms	1990	1990-2015	All Crops	Default	Forest	1992	787.028	787.028
Linear	nrms	1990	1990-2015	All Crops	Default	Forest	1993	873.32	873.32
Linear	nrms	1990	1990-2015	All Crops	Default	Forest	1994	1326.74	1326.74
Linear	nrms	1990	1990-2015	All Crops	Default	Forest	1995	1566.45	1566.45
Linear	nrms	1990	1990-2015	All Crops	Default	Forest	1996	1656.11	1656.11
Linear	nrms	1990	1990-2015	All Crops	Default	Forest	1997	1652.57	1652.57
Linear	nrms	1990	1990-2015	All Crops	Default	Forest	1998	1424	1424
Linear	nrms	1990	1990-2015	All Crops	Default	Forest	1999	686.358	686.358
Linear	nrms	1990	1990-2015	All Crops	Default	Forest	2000	126.152	126.152
Linear	nrms	1990	1990-2015	All Crops	Default	Forest	2001	38.8359	38.8359
Linear	nrms	1990	1990-2015	All Crops	Default	Forest	2002	1.25607	1.25607
Linear	nrms	1990	1990-2015	All Crops	Default	Forest	2003	2.06731	2.06731
Linear	nrms	1990	1990-2015	All Crops	Default	Forest	2004	106.108	106.108
Linear	nrms	1990	1990-2015	All Crops	Default	Forest	2005	376.662	376.662
Linear	nrms	1990	1990-2015	All Crops	Default	Forest	2006	490.043	490.043
Linear	nrms	1990	1990-2015	All Crops	Default	Forest	2007	589.993	589.993
Linear	nrms	1990	1990-2015	All Crops	Default	Forest	2008	765.021	765.021
Linear	nrms	1990	1990-2015	All Crops	Default	Forest	2009	740.724	740.724
Linear	nrms	1990	1990-2015	All Crops	Default	Forest	2010	528.556	528.556
Linear	nrms	1990	1990-2015	All Crops	Default	Forest	2011	642.47	642.47
Linear	nrms	1990	1990-2015	All Crops	Default	Forest	2012	751.287	751.287
Linear	nrms	1990	1990-2015	All Crops	Default	Forest	2013	833.067	833.067
Linear	nrms	1990	1990-2015	All Crops	Default	Forest	2014	874.651	874.651
Linear	nrms	1990	1990-2015	All Crops	Default	Forest	2015	937.852	937.852
Perfect	nrms	1990	1990-2015	All Crops	Default	UrbanLand	1990	116.34	NA
Perfect	nrms	1990	1990-2015	All Crops	Default	UrbanLand	1991	116.34	NA
Perfect	nrms	1990	1990-2015	All Crops	Default	UrbanLand	1992	116.34	NA
Perfect	nrms	1990	1990-2015	All Crops	Default	UrbanLand	1993	116.34	NA
Perfect	nrms	1990	1990-2015	All Crops	Default	UrbanLand	1994	116.34	NA
Perfect	nrms	1990	1990-2015	All Crops	Default	UrbanLand	1995	116.34	NA
Perfect	nrms	1990	1990-2015	All Crops	Default	UrbanLand	1996	116.34	NA
Perfect	nrms	1990	1990-2015	All Crops	Default	UrbanLand	1997	116.34	NA
Perfect	nrms	1990	1990-2015	All Crops	Default	UrbanLand	1998	116.34	NA
Perfect	nrms	1990	1990-2015	All Crops	Default	UrbanLand	1999	116.34	NA
Perfect	nrms	1990	1990-2015	All Crops	Default	UrbanLand	2000	116.34	NA
Perfect	nrms	1990	1990-2015	All Crops	Default	UrbanLand	2001	116.34	NA
Perfect	nrms	1990	1990-2015	All Crops	Default	UrbanLand	2002	116.34	NA
Perfect	nrms	1990	1990-2015	All Crops	Default	UrbanLand	2003	116.34	NA
Perfect	nrms	1990	1990-2015	All Crops	Default	UrbanLand	2004	116.34	NA
Perfect	nrms	1990	1990-2015	All Crops	Default	UrbanLand	2005	116.34	NA
Perfect	nrms	1990	1990-2015	All Crops	Default	UrbanLand	2006	116.34	NA
Perfect	nrms	1990	1990-2015	All Crops	Default	UrbanLand	2007	116.34	NA
Perfect	nrms	1990	1990-2015	All Crops	Default	UrbanLand	2008	116.34	NA
Perfect	nrms	1990	1990-2015	All Crops	Default	UrbanLand	2009	116.34	NA
Perfect	nrms	1990	1990-2015	All Crops	Default	UrbanLand	2010	116.34	NA
Perfect	nrms	1990	1990-2015	All Crops	Default	UrbanLand	2011	116.34	NA
Perfect	nrms	1990	1990-2015	All Crops	Default	UrbanLand	2012	116.34	NA
Perfect	nrms	1990	1990-2015	All Crops	Default	UrbanLand	2013	116.34	NA
Perfect	nrms	1990	1990-2015	All Crops	Default	UrbanLand	2014	116.34	NA
Perfect	nrms	1990	1990-2015	All Crops	Default	UrbanLand	2015	116.34	NA
Perfect	nrms	1990	1990-2015	All Crops	Default	Tundra	1990	240.732	NA
Perfect	nrms	1990	1990-2015	All Crops	Default	Tundra	1991	240.732	NA
Perfect	nrms	1990	1990-2015	All Crops	Default	Tundra	1992	240.732	NA
Perfect	nrms	1990	1990-2015	All Crops	Default	Tundra	1993	240.732	NA
Perfect	nrms	1990	1990-2015	All Crops	Default	Tundra	1994	240.732	NA
Perfect	nrms	1990	1990-2015	All Crops	Default	Tundra	1995	240.732	NA
Perfect	nrms	1990	1990-2015	All Crops	Default	Tundra	1996	240.732	NA
Perfect	nrms	1990	1990-2015	All Crops	Default	Tundra	1997	240.732	NA
Perfect	nrms	1990	1990-2015	All Crops	Default	Tundra	1998	240.732	NA
Perfect	nrms	1990	1990-2015	All Crops	Default	Tundra	1999	240.732	NA
Perfect	nrms	1990	1990-2015	All Crops	Default	Tundra	2000	240.732	NA
Perfect	nrms	1990	1990-2015	All Crops	Default	Tundra	2001	240.732	NA
Perfect	nrms	1990	1990-2015	All Crops	Default	Tundra	2002	240.732	NA
Perfect	nrms	1990	1990-2015	All Crops	Default	Tundra	2003	240.732	NA
Perfect	nrms	1990	1990-2015	All Crops	Default	Tundra	2004	240.732	NA
Perfect	nrms	1990	1990-2015	All Crops	Default	Tundra	2005	240.732	NA
Perfect	nrms	1990	1990-2015	All Crops	Default	Tundra	2006	240.732	NA
Perfect	nrms	1990	1990-2015	All Crops	Default	Tundra	2007	240.732	NA
Perfect	nrms	1990	1990-2015	All Crops	Default	Tundra	2008	240.732	NA
Perfect	nrms	1990	1990-2015	All Crops	Default	Tundra	2009	240.732	NA
Perfect	nrms	1990	1990-2015	All Crops	Default	Tundra	2010	240.732	NA
Perfect	nrms	1990	1990-2015	All Crops	Default	Tundra	2011	240.732	NA
Perfect	nrms	1990	1990-2015	All Crops	Default	Tundra	2012	240.732	NA
Perfect	nrms	1990	1990-2015	All Crops	Default	Tundra	2013	240.732	NA
Perfect	nrms	1990	1990-2015	All Crops	Default	Tundra	2014	240.732	NA
Perfect	nrms	1990	1990-2015	All Crops	Default	Tundra	2015	240.732	NA
Perfect	nrms	1990	1990-2015	All Crops	Default	RockIceDesert	1990	34.1785	NA
Perfect	nrms	1990	1990-2015	All Crops	Default	RockIceDesert	1991	34.1785	NA
Perfect	nrms	1990	1990-2015	All Crops	Default	RockIceDesert	1992	34.1785	NA
Perfect	nrms	1990	1990-2015	All Crops	Default	RockIceDesert	1993	34.1785	NA
Perfect	nrms	1990	1990-2015	All Crops	Default	RockIceDesert	1994	34.1785	NA
Perfect	nrms	1990	1990-2015	All Crops	Default	RockIceDesert	1995	34.1785	NA
Perfect	nrms	1990	1990-2015	All Crops	Default	RockIceDesert	1996	34.1785	NA
Perfect	nrms	1990	1990-2015	All Crops	Default	RockIceDesert	1997	34.1785	NA
Perfect	nrms	1990	1990-2015	All Crops	Default	RockIceDesert	1998	34.1785	NA
Perfect	nrms	1990	1990-2015	All Crops	Default	RockIceDesert	1999	34.1785	NA
Perfect	nrms	1990	1990-2015	All Crops	Default	RockIceDesert	2000	34.1785	NA
Perfect	nrms	1990	1990-2015	All Crops	Default	RockIceDesert	2001	34.1785	NA
Perfect	nrms	1990	1990-2015	All Crops	Default	RockIceDesert	2002	34.1785	NA
Perfect	nrms	1990	1990-2015	All Crops	Default	RockIceDesert	2003	34.1785	NA
Perfect	nrms	1990	1990-2015	All Crops	Default	RockIceDesert	2004	34.1785	NA
Perfect	nrms	1990	1990-2015	All Crops	Default	RockIceDesert	2005	34.1785	NA
Perfect	nrms	1990	1990-2015	All Crops	Default	RockIceDesert	2006	34.1785	NA
Perfect	nrms	1990	1990-2015	All Crops	Default	RockIceDesert	2007	34.1785	NA
Perfect	nrms	1990	1990-2015	All Crops	Default	RockIceDesert	2008	34.1785	NA
Perfect	nrms	1990	1990-2015	All Crops	Default	RockIceDesert	2009	34.1785	NA
Perfect	nrms	1990	1990-2015	All Crops	Default	RockIceDesert	2010	34.1785	NA
Perfect	nrms	1990	1990-2015	All Crops	Default	RockIceDesert	2011	34.1785	NA
Perfect	nrms	1990	1990-2015	All Crops	Default	RockIceDesert	2012	34.1785	NA
Perfect	nrms	1990	1990-2015	All Crops	Default	RockIceDesert	2013	34.1785	NA
Perfect	nrms	1990	1990-2015	All Crops	Default	RockIceDesert	2014	34.1785	NA
Perfect	nrms	1990	1990-2015	All Crops	Default	RockIceDesert	2015	34.1785	NA
Perfect	nrms	1990	1990-2015	All Crops	Default	UnmanagedPasture	1990	2313.1	NA
Perfect	nrms	1990	1990-2015	All Crops	Default	UnmanagedPasture	1991	2328.19	NA
Perfect	nrms	1990	1990-2015	All Crops	Default	UnmanagedPasture	1992	2307.33	NA
Perfect	nrms	1990	1990-2015	All Crops	Default	UnmanagedPasture	1993	2261.08	NA
Perfect	nrms	1990	1990-2015	All Crops	Default	UnmanagedPasture	1994	2267.72	NA
Perfect	nrms	1990	1990-2015	All Crops	Default	UnmanagedPasture	1995	2259.71	NA
Perfect	nrms	1990	1990-2015	All Crops	Default	UnmanagedPasture	1996	2255.91	NA
Perfect	nrms	1990	1990-2015	All Crops	Default	UnmanagedPasture	1997	2302.77	NA
Perfect	nrms	1990	1990-2015	All Crops	Default	UnmanagedPasture	1998	2356.65	NA
Perfect	nrms	1990	1990-2015	All Crops	Default	UnmanagedPasture	1999	2365.17	NA
Perfect	nrms	1990	1990-2015	All Crops	Default	UnmanagedPasture	2000	2360.83	NA
Perfect	nrms	1990	1990-2015	All Crops	Default	UnmanagedPasture	2001	2370.84	NA
Perfect	nrms	1990	1990-2015	All Crops	Default	UnmanagedPasture	2002	2346.31	NA
Perfect	nrms	1990	1990-2015	All Crops	Default	UnmanagedPasture	2003	2334.05	NA
Perfect	nrms	1990	1990-2015	All Crops	Default	UnmanagedPasture	2004	2335.86	NA
Perfect	nrms	1990	1990-2015	All Crops	Default	UnmanagedPasture	2005	2346.54	NA
Perfect	nrms	1990	1990-2015	All Crops	Default	UnmanagedPasture	2006	2320.38	NA
Perfect	nrms	1990	1990-2015	All Crops	Default	UnmanagedPasture	2007	2279.16	NA
Perfect	nrms	1990	1990-2015	All Crops	Default	UnmanagedPasture	2008	2295.58	NA
Perfect	nrms	1990	1990-2015	All Crops	Default	UnmanagedPasture	2009	2322.06	NA
Perfect	nrms	1990	1990-2015	All Crops	Default	UnmanagedPasture	2010	2269.14	NA
Perfect	nrms	1990	1990-2015	All Crops	Default	UnmanagedPasture	2011	2260.22	NA
Perfect	nrms	1990	1990-2015	All Crops	Default	UnmanagedPasture	2012	2257.14	NA
Perfect	nrms	1990	1990-2015	All Crops	Default	UnmanagedPasture	2013	2275.05	NA
Perfect	nrms	1990	1990-2015	All Crops	Default	UnmanagedPasture	2014	2295.92	NA
Perfect	nrms	1990	1990-2015	All Crops	Default	UnmanagedPasture	2015	2305.39	NA
Perfect	nrms	1990	1990-2015	All Crops	Default	Pasture	1990	67.8453	67.8453
Perfect	nrms	1990	1990-2015	All Crops	Default	Pasture	1991	68.288	68.288
Perfect	nrms	1990	1990-2015	All Crops	Default	Pasture	1992	67.6761	67.6761
Perfect	nrms	1990	1990-2015	All Crops	Default	Pasture	1993	66.3194	66.3194
Perfect	nrms	1990	1990-2015	All Crops	Default	Pasture	1994	66.5143	66.5143
Perfect	nrms	1990	1990-2015	All Crops	Default	Pasture	1995	66.2793	66.2793
Perfect	nrms	1990	1990-2015	All Crops	Default	Pasture	1996	66.1678	66.1678
Perfect	nrms	1990	1990-2015	All Crops	Default	Pasture	1997	67.5421	67.5421
Perfect	nrms	1990	1990-2015	All Crops	Default	Pasture	1998	69.1227	69.1227
Perfect	nrms	1990	1990-2015	All Crops	Default	Pasture	1999	69.3724	69.3724
Perfect	nrms	1990	1990-2015	All Crops	Default	Pasture	2000	69.2453	69.2453
Perfect	nrms	1990	1990-2015	All Crops	Default	Pasture	2001	69.5387	69.5387
Perfect	nrms	1990	1990-2015	All Crops	Default	Pasture	2002	68.8194	68.8194
Perfect	nrms	1990	1990-2015	All Crops	Default	Pasture	2003	68.4597	68.4597
Perfect	nrms	1990	1990-2015	All Crops	Default	Pasture	2004	68.5127	68.5127
Perfect	nrms	1990	1990-2015	All Crops	Default	Pasture	2005	68.826	68.826
Perfect	nrms	1990	1990-2015	All Crops	Default	Pasture	2006	68.0587	68.0587
Perfect	nrms	1990	1990-2015	All Crops	Default	Pasture	2007	66.8496	66.8496
Perfect	nrms	1990	1990-2015	All Crops	Default	Pasture	2008	67.3314	67.3314
Perfect	nrms	1990	1990-2015	All Crops	Default	Pasture	2009	68.1079	68.1079
Perfect	nrms	1990	1990-2015	All Crops	Default	Pasture	2010	66.5559	66.5559
Perfect	nrms	1990	1990-2015	All Crops	Default	Pasture	2011	66.2943	66.2943
Perfect	nrms	1990	1990-2015	All Crops	Default	Pasture	2012	66.204	66.204
Perfect	nrms	1990	1990-2015	All Crops	Default	Pasture	2013	66.7293	66.7293
Perfect	nrms	1990	1990-2015	All Crops	Default	Pasture	2014	67.3412	67.3412
Perfect	nrms	1990	1990-2015	All Crops	Default	Pasture	2015	67.6189	67.6189
Perfect	nrms	1990	1990-2015	All Crops	Default	Shrubland	1990	742.798	NA
Perfect	nrms	1990	1990-2015	All Crops	Default	Shrubland	1991	741.23	NA
Perfect	nrms	1990	1990-2015	All Crops	Default	Shrubland	1992	743.396	NA
Perfect	nrms	1990	1990-2015	All Crops	Default	Shrubland	1993	748.181	NA
Perfect	nrms	1990	1990-2015	All Crops	Default	Shrubland	1994	747.496	NA
Perfect	nrms	1990	1990-2015	All Crops	Default	Shrubland	1995	748.323	NA
Perfect	nrms	1990	1990-2015	All Crops	Default	Shrubland	1996	748.715	NA
Perfect	nrms	1990	1990-2015	All Crops	Default	Shrubland	1997	743.87	NA
Perfect	nrms	1990	1990-2015	All Crops	Default	Shrubland	1998	738.267	NA
Perfect	nrms	1990	1990-2015	All Crops	Default	Shrubland	1999	737.379	NA
Perfect	nrms	1990	1990-2015	All Crops	Default	Shrubland	2000	737.831	NA
Perfect	nrms	1990	1990-2015	All Crops	Default	Shrubland	2001	736.787	NA
Perfect	nrms	1990	1990-2015	All Crops	Default	Shrubland	2002	739.345	NA
Perfect	nrms	1990	1990-2015	All Crops	Default	Shrubland	2003	740.621	NA
Perfect	nrms	1990	1990-2015	All Crops	Default	Shrubland	2004	740.433	NA
Perfect	nrms	1990	1990-2015	All Crops	Default	Shrubland	2005	739.321	NA
Perfect	nrms	1990	1990-2015	All Crops	Default	Shrubland	2006	742.043	NA
Perfect	nrms	1990	1990-2015	All Crops	Default	Shrubland	2007	746.314	NA
Perfect	nrms	1990	1990-2015	All Crops	Default	Shrubland	2008	744.615	NA
Perfect	nrms	1990	1990-2015	All Crops	Default	Shrubland	2009	741.868	NA
Perfect	nrms	1990	1990-2015	All Crops	Default	Shrubland	2010	747.349	NA
Perfect	nrms	1990	1990-2015	All Crops	Default	Shrubland	2011	748.27	NA
Perfect	nrms	1990	1990-2015	All Crops	Default	Shrubland	2012	748.587	NA
Perfect	nrms	1990	1990-2015	All Crops	Default	Shrubland	2013	746.738	NA
Perfect	nrms	1990	1990-2015	All Crops	Default	Shrubland	2014	744.58	NA
Perfect	nrms	1990	1990-2015	All Crops	Default	Shrubland	2015	743.599	NA
Perfect	nrms	1990	1990-2015	All Crops	Default	Grassland	1990	588.538	NA
Perfect	nrms	1990	1990-2015	All Crops	Default	Grassland	1991	587.296	NA
Perfect	nrms	1990	1990-2015	All Crops	Default	Grassland	1992	589.012	NA
Perfect	nrms	1990	1990-2015	All Crops	Default	Grassland	1993	592.803	NA
Perfect	nrms	1990	1990-2015	All Crops	Default	Grassland	1994	592.26	NA
Perfect	nrms	1990	1990-2015	All Crops	Default	Grassland	1995	592.915	NA
Perfect	nrms	1990	1990-2015	All Crops	Default	Grassland	1996	593.226	NA
Perfect	nrms	1990	1990-2015	All Crops	Default	Grassland	1997	589.387	NA
Perfect	nrms	1990	1990-2015	All Crops	Default	Grassland	1998	584.948	NA
Perfect	nrms	1990	1990-2015	All Crops	Default	Grassland	1999	584.244	NA
Perfect	nrms	1990	1990-2015	All Crops	Default	Grassland	2000	584.603	NA
Perfect	nrms	1990	1990-2015	All Crops	Default	Grassland	2001	583.775	NA
Perfect	nrms	1990	1990-2015	All Crops	Default	Grassland	2002	585.802	NA
Perfect	nrms	1990	1990-2015	All Crops	Default	Grassland	2003	586.813	NA
Perfect	nrms	1990	1990-2015	All Crops	Default	Grassland	2004	586.664	NA
Perfect	nrms	1990	1990-2015	All Crops	Default	Grassland	2005	585.783	NA
Perfect	nrms	1990	1990-2015	All Crops	Default	Grassland	2006	587.94	NA
Perfect	nrms	1990	1990-2015	All Crops	Default	Grassland	2007	591.324	NA
Perfect	nrms	1990	1990-2015	All Crops	Default	Grassland	2008	589.977	NA
Perfect	nrms	1990	1990-2015	All Crops	Default	Grassland	2009	587.801	NA
Perfect	nrms	1990	1990-2015	All Crops	Default	Grassland	2010	592.144	NA
Perfect	nrms	1990	1990-2015	All Crops	Default	Grassland	2011	592.873	NA
Perfect	nrms	1990	1990-2015	All Crops	Default	Grassland	2012	593.125	NA
Perfect	nrms	1990	1990-2015	All Crops	Default	Grassland	2013	591.66	NA
Perfect	nrms	1990	1990-2015	All Crops	Default	Grassland	2014	589.95	NA
Perfect	nrms	1990	1990-2015	All Crops	Default	Grassland	2015	589.172	NA
Perfect	nrms	1990	1990-2015	All Crops	Default	OtherArableLand	1990	685.461	NA
Perfect	nrms	1990	1990-2015	All Crops	Default	OtherArableLand	1991	685.23	NA
Perfect	nrms	1990	1990-2015	All Crops	Default	OtherArableLand	1992	686.312	NA
Perfect	nrms	1990	1990-2015	All Crops	Default	OtherArableLand	1993	690.744	NA
Perfect	nrms	1990	1990-2015	All Crops	Default	OtherArableLand	1994	690.129	NA
Perfect	nrms	1990	1990-2015	All Crops	Default	OtherArableLand	1995	686.946	NA
Perfect	nrms	1990	1990-2015	All Crops	Default	OtherArableLand	1996	685.731	NA
Perfect	nrms	1990	1990-2015	All Crops	Default	OtherArableLand	1997	687.419	NA
Perfect	nrms	1990	1990-2015	All Crops	Default	OtherArableLand	1998	686.992	NA
Perfect	nrms	1990	1990-2015	All Crops	Default	OtherArableLand	1999	688.795	NA
Perfect	nrms	1990	1990-2015	All Crops	Default	OtherArableLand	2000	688.62	NA
Perfect	nrms	1990	1990-2015	All Crops	Default	OtherArableLand	2001	688.236	NA
Perfect	nrms	1990	1990-2015	All Crops	Default	OtherArableLand	2002	684.755	NA
Perfect	nrms	1990	1990-2015	All Crops	Default	OtherArableLand	2003	684.031	NA
Perfect	nrms	1990	1990-2015	All Crops	Default	OtherArableLand	2004	686.475	NA
Perfect	nrms	1990	1990-2015	All Crops	Default	OtherArableLand	2005	688.396	NA
Perfect	nrms	1990	1990-2015	All Crops	Default	OtherArableLand	2006	684.711	NA
Perfect	nrms	1990	1990-2015	All Crops	Default	OtherArableLand	2007	680.694	NA
Perfect	nrms	1990	1990-2015	All Crops	Default	OtherArableLand	2008	681.453	NA
Perfect	nrms	1990	1990-2015	All Crops	Default	OtherArableLand	2009	682.549	NA
Perfect	nrms	1990	1990-2015	All Crops	Default	OtherArableLand	2010	681.119	NA
Perfect	nrms	1990	1990-2015	All Crops	Default	OtherArableLand	2011	679.607	NA
Perfect	nrms	1990	1990-2015	All Crops	Default	OtherArableLand	2012	679.173	NA
Perfect	nrms	1990	1990-2015	All Crops	Default	OtherArableLand	2013	681.691	NA
Perfect	nrms	1990	1990-2015	All Crops	Default	OtherArableLand	2014	684.606	NA
Perfect	nrms	1990	1990-2015	All Crops	Default	OtherArableLand	2015	685.923	NA
Perfect	nrms	1990	1990-2015	All Crops	Default	Wheat	1990	266.987	279.65
Perfect	nrms	1990	1990-2015	All Crops	Default	Wheat	1991	267.555	280.245
Perfect	nrms	1990	1990-2015	All Crops	Default	Wheat	1992	272.232	285.143
Perfect	nrms	1990	1990-2015	All Crops	Default	Wheat	1993	273.317	286.279
Perfect	nrms	1990	1990-2015	All Crops	Default	Wheat	1994	272.771	285.708
Perfect	nrms	1990	1990-2015	All Crops	Default	Wheat	1995	276.48	289.593
Perfect	nrms	1990	1990-2015	All Crops	Default	Wheat	1996	276.418	289.527
Perfect	nrms	1990	1990-2015	All Crops	Default	Wheat	1997	268.641	281.382
Perfect	nrms	1990	1990-2015	All Crops	Default	Wheat	1998	265.346	277.93
Perfect	nrms	1990	1990-2015	All Crops	Default	Wheat	1999	264.427	276.968
Perfect	nrms	1990	1990-2015	All Crops	Default	Wheat	2000	264.375	276.914
Perfect	nrms	1990	1990-2015	All Crops	Default	Wheat	2001	263.194	275.676
Perfect	nrms	1990	1990-2015	All Crops	Default	Wheat	2002	268.929	281.684
Perfect	nrms	1990	1990-2015	All Crops	Default	Wheat	2003	268.301	281.026
Perfect	nrms	1990	1990-2015	All Crops	Default	Wheat	2004	267.797	280.498
Perfect	nrms	1990	1990-2015	All Crops	Default	Wheat	2005	265.764	278.369
Perfect	nrms	1990	1990-2015	All Crops	Default	Wheat	2006	268.638	281.379
Perfect	nrms	1990	1990-2015	All Crops	Default	Wheat	2007	277.16	290.305
Perfect	nrms	1990	1990-2015	All Crops	Default	Wheat	2008	276.659	289.78
Perfect	nrms	1990	1990-2015	All Crops	Default	Wheat	2009	268.15	280.868
Perfect	nrms	1990	1990-2015	All Crops	Default	Wheat	2010	274.461	287.478
Perfect	nrms	1990	1990-2015	All Crops	Default	Wheat	2011	277.137	290.281
Perfect	nrms	1990	1990-2015	All Crops	Default	Wheat	2012	279.007	292.24
Perfect	nrms	1990	1990-2015	All Crops	Default	Wheat	2013	276.443	289.554
Perfect	nrms	1990	1990-2015	All Crops	Default	Wheat	2014	272.322	285.238
Perfect	nrms	1990	1990-2015	All Crops	Default	Wheat	2015	267.34	280.02
Perfect	nrms	1990	1990-2015	All Crops	Default	SugarCrop	1990	8.60991	8.97046
Perfect	nrms	1990	1990-2015	All Crops	Default	SugarCrop	1991	8.44764	8.8014
Perfect	nrms	1990	1990-2015	All Crops	Default	SugarCrop	1992	8.47934	8.83443
Perfect	nrms	1990	1990-2015	All Crops	Default	SugarCrop	1993	8.48913	8.84463
Perfect	nrms	1990	1990-2015	All Crops	Default	SugarCrop	1994	8.51405	8.87058
Perfect	nrms	1990	1990-2015	All Crops	Default	SugarCrop	1995	8.43565	8.78891
Perfect	nrms	1990	1990-2015	All Crops	Default	SugarCrop	1996	8.53415	8.89153
Perfect	nrms	1990	1990-2015	All Crops	Default	SugarCrop	1997	8.49153	8.84712
Perfect	nrms	1990	1990-2015	All Crops	Default	SugarCrop	1998	8.47474	8.82963
Perfect	nrms	1990	1990-2015	All Crops	Default	SugarCrop	1999	8.46324	8.81765
Perfect	nrms	1990	1990-2015	All Crops	Default	SugarCrop	2000	8.48333	8.83858
Perfect	nrms	1990	1990-2015	All Crops	Default	SugarCrop	2001	8.51596	8.87258
Perfect	nrms	1990	1990-2015	All Crops	Default	SugarCrop	2002	8.45117	8.80508
Perfect	nrms	1990	1990-2015	All Crops	Default	SugarCrop	2003	8.49584	8.85161
Perfect	nrms	1990	1990-2015	All Crops	Default	SugarCrop	2004	8.41822	8.77074
Perfect	nrms	1990	1990-2015	All Crops	Default	SugarCrop	2005	8.46754	8.82212
Perfect	nrms	1990	1990-2015	All Crops	Default	SugarCrop	2006	8.51114	8.86756
Perfect	nrms	1990	1990-2015	All Crops	Default	SugarCrop	2007	8.37809	8.72893
Perfect	nrms	1990	1990-2015	All Crops	Default	SugarCrop	2008	8.40938	8.76154
Perfect	nrms	1990	1990-2015	All Crops	Default	SugarCrop	2009	8.49578	8.85155
Perfect	nrms	1990	1990-2015	All Crops	Default	SugarCrop	2010	8.64499	9.00701
Perfect	nrms	1990	1990-2015	All Crops	Default	SugarCrop	2011	8.62532	8.98652
Perfect	nrms	1990	1990-2015	All Crops	Default	SugarCrop	2012	8.62609	8.98732
Perfect	nrms	1990	1990-2015	All Crops	Default	SugarCrop	2013	8.39551	8.74708
Perfect	nrms	1990	1990-2015	All Crops	Default	SugarCrop	2014	8.42985	8.78286
Perfect	nrms	1990	1990-2015	All Crops	Default	SugarCrop	2015	8.45246	8.80642
Perfect	nrms	1990	1990-2015	All Crops	Default	Root_Tuber	1990	5.74808	5.9508
Perfect	nrms	1990	1990-2015	All Crops	Default	Root_Tuber	1991	5.63345	5.83213
Perfect	nrms	1990	1990-2015	All Crops	Default	Root_Tuber	1992	5.70669	5.90796
Perfect	nrms	1990	1990-2015	All Crops	Default	Root_Tuber	1993	5.79509	5.99947
Perfect	nrms	1990	1990-2015	All Crops	Default	Root_Tuber	1994	5.73679	5.93912
Perfect	nrms	1990	1990-2015	All Crops	Default	Root_Tuber	1995	5.78932	5.9935
Perfect	nrms	1990	1990-2015	All Crops	Default	Root_Tuber	1996	5.60589	5.8036
Perfect	nrms	1990	1990-2015	All Crops	Default	Root_Tuber	1997	5.69522	5.89608
Perfect	nrms	1990	1990-2015	All Crops	Default	Root_Tuber	1998	5.67401	5.87412
Perfect	nrms	1990	1990-2015	All Crops	Default	Root_Tuber	1999	5.71663	5.91825
Perfect	nrms	1990	1990-2015	All Crops	Default	Root_Tuber	2000	5.6334	5.83208
Perfect	nrms	1990	1990-2015	All Crops	Default	Root_Tuber	2001	5.78893	5.99309
Perfect	nrms	1990	1990-2015	All Crops	Default	Root_Tuber	2002	5.73107	5.93319
Perfect	nrms	1990	1990-2015	All Crops	Default	Root_Tuber	2003	5.66151	5.86118
Perfect	nrms	1990	1990-2015	All Crops	Default	Root_Tuber	2004	5.65365	5.85305
Perfect	nrms	1990	1990-2015	All Crops	Default	Root_Tuber	2005	5.77643	5.98016
Perfect	nrms	1990	1990-2015	All Crops	Default	Root_Tuber	2006	5.75208	5.95494
Perfect	nrms	1990	1990-2015	All Crops	Default	Root_Tuber	2007	5.72268	5.9245
Perfect	nrms	1990	1990-2015	All Crops	Default	Root_Tuber	2008	5.82042	6.0257
Perfect	nrms	1990	1990-2015	All Crops	Default	Root_Tuber	2009	5.79663	6.00106
Perfect	nrms	1990	1990-2015	All Crops	Default	Root_Tuber	2010	5.81997	6.02522
Perfect	nrms	1990	1990-2015	All Crops	Default	Root_Tuber	2011	5.80218	6.00681
Perfect	nrms	1990	1990-2015	All Crops	Default	Root_Tuber	2012	5.74917	5.95193
Perfect	nrms	1990	1990-2015	All Crops	Default	Root_Tuber	2013	5.84477	6.05091
Perfect	nrms	1990	1990-2015	All Crops	Default	Root_Tuber	2014	5.82667	6.03216
Perfect	nrms	1990	1990-2015	All Crops	Default	Root_Tuber	2015	5.81442	6.01949
Perfect	nrms	1990	1990-2015	All Crops	Default	Rice	1990	11.379	11.424
Perfect	nrms	1990	1990-2015	All Crops	Default	Rice	1991	11.5291	11.5747
Perfect	nrms	1990	1990-2015	All Crops	Default	Rice	1992	11.1714	11.2156
Perfect	nrms	1990	1990-2015	All Crops	Default	Rice	1993	11.6584	11.7045
Perfect	nrms	1990	1990-2015	All Crops	Default	Rice	1994	11.3804	11.4254
Perfect	nrms	1990	1990-2015	All Crops	Default	Rice	1995	11.7146	11.7609
Perfect	nrms	1990	1990-2015	All Crops	Default	Rice	1996	11.7469	11.7934
Perfect	nrms	1990	1990-2015	All Crops	Default	Rice	1997	11.7987	11.8454
Perfect	nrms	1990	1990-2015	All Crops	Default	Rice	1998	11.6409	11.6869
Perfect	nrms	1990	1990-2015	All Crops	Default	Rice	1999	10.9794	11.0229
Perfect	nrms	1990	1990-2015	All Crops	Default	Rice	2000	11.2189	11.2633
Perfect	nrms	1990	1990-2015	All Crops	Default	Rice	2001	10.3349	10.3758
Perfect	nrms	1990	1990-2015	All Crops	Default	Rice	2002	10.6916	10.7339
Perfect	nrms	1990	1990-2015	All Crops	Default	Rice	2003	11.5917	11.6376
Perfect	nrms	1990	1990-2015	All Crops	Default	Rice	2004	11.4749	11.5203
Perfect	nrms	1990	1990-2015	All Crops	Default	Rice	2005	11.3981	11.4432
Perfect	nrms	1990	1990-2015	All Crops	Default	Rice	2006	11.7245	11.7709
Perfect	nrms	1990	1990-2015	All Crops	Default	Rice	2007	11.9085	11.9556
Perfect	nrms	1990	1990-2015	All Crops	Default	Rice	2008	12.0816	12.1294
Perfect	nrms	1990	1990-2015	All Crops	Default	Rice	2009	11.9847	12.0321
Perfect	nrms	1990	1990-2015	All Crops	Default	Rice	2010	11.782	11.8286
Perfect	nrms	1990	1990-2015	All Crops	Default	Rice	2011	11.8428	11.8896
Perfect	nrms	1990	1990-2015	All Crops	Default	Rice	2012	11.8967	11.9438
Perfect	nrms	1990	1990-2015	All Crops	Default	Rice	2013	11.9735	12.0209
Perfect	nrms	1990	1990-2015	All Crops	Default	Rice	2014	11.7405	11.7869
Perfect	nrms	1990	1990-2015	All Crops	Default	Rice	2015	11.6962	11.7425
Perfect	nrms	1990	1990-2015	All Crops	Default	PalmFruit	1990	0	0
Perfect	nrms	1990	1990-2015	All Crops	Default	PalmFruit	1991	0	0
Perfect	nrms	1990	1990-2015	All Crops	Default	PalmFruit	1992	0	0
Perfect	nrms	1990	1990-2015	All Crops	Default	PalmFruit	1993	0	0
Perfect	nrms	1990	1990-2015	All Crops	Default	PalmFruit	1994	0	0
Perfect	nrms	1990	1990-2015	All Crops	Default	PalmFruit	1995	0	0
Perfect	nrms	1990	1990-2015	All Crops	Default	PalmFruit	1996	0	0
Perfect	nrms	1990	1990-2015	All Crops	Default	PalmFruit	1997	0	0
Perfect	nrms	1990	1990-2015	All Crops	Default	PalmFruit	1998	0	0
Perfect	nrms	1990	1990-2015	All Crops	Default	PalmFruit	1999	0	0
Perfect	nrms	1990	1990-2015	All Crops	Default	PalmFruit	2000	0	0
Perfect	nrms	1990	1990-2015	All Crops	Default	PalmFruit	2001	0	0
Perfect	nrms	1990	1990-2015	All Crops	Default	PalmFruit	2002	0	0
Perfect	nrms	1990	1990-2015	All Crops	Default	PalmFruit	2003	0	0
Perfect	nrms	1990	1990-2015	All Crops	Default	PalmFruit	2004	0	0
Perfect	nrms	1990	1990-2015	All Crops	Default	PalmFruit	2005	0	0
Perfect	nrms	1990	1990-2015	All Crops	Default	PalmFruit	2006	0	0
Perfect	nrms	1990	1990-2015	All Crops	Default	PalmFruit	2007	0	0
Perfect	nrms	1990	1990-2015	All Crops	Default	PalmFruit	2008	0	0
Perfect	nrms	1990	1990-2015	All Crops	Default	PalmFruit	2009	0	0
Perfect	nrms	1990	1990-2015	All Crops	Default	PalmFruit	2010	0	0
Perfect	nrms	1990	1990-2015	All Crops	Default	PalmFruit	2011	0	0
Perfect	nrms	1990	1990-2015	All Crops	Default	PalmFruit	2012	0	0
Perfect	nrms	1990	1990-2015	All Crops	Default	PalmFruit	2013	0	0
Perfect	nrms	1990	1990-2015	All Crops	Default	PalmFruit	2014	0	0
Perfect	nrms	1990	1990-2015	All Crops	Default	PalmFruit	2015	0	0
Perfect	nrms	1990	1990-2015	All Crops	Default	OtherGrain	1990	91.0264	94.978
Perfect	nrms	1990	1990-2015	All Crops	Default	OtherGrain	1991	90.8569	94.8011
Perfect	nrms	1990	1990-2015	All Crops	Default	OtherGrain	1992	90.1281	94.0407
Perfect	nrms	1990	1990-2015	All Crops	Default	OtherGrain	1993	91.1437	95.1004
Perfect	nrms	1990	1990-2015	All Crops	Default	OtherGrain	1994	90.5115	94.4407
Perfect	nrms	1990	1990-2015	All Crops	Default	OtherGrain	1995	92.8741	96.9058
Perfect	nrms	1990	1990-2015	All Crops	Default	OtherGrain	1996	91.3883	95.3556
Perfect	nrms	1990	1990-2015	All Crops	Default	OtherGrain	1997	89.8682	93.7695
Perfect	nrms	1990	1990-2015	All Crops	Default	OtherGrain	1998	85.3751	89.0814
Perfect	nrms	1990	1990-2015	All Crops	Default	OtherGrain	1999	84.5043	88.1727
Perfect	nrms	1990	1990-2015	All Crops	Default	OtherGrain	2000	86.6557	90.4176
Perfect	nrms	1990	1990-2015	All Crops	Default	OtherGrain	2001	85.8678	89.5955
Perfect	nrms	1990	1990-2015	All Crops	Default	OtherGrain	2002	89.3505	93.2293
Perfect	nrms	1990	1990-2015	All Crops	Default	OtherGrain	2003	89.7044	93.5986
Perfect	nrms	1990	1990-2015	All Crops	Default	OtherGrain	2004	87.5943	91.3969
Perfect	nrms	1990	1990-2015	All Crops	Default	OtherGrain	2005	85.9586	89.6902
Perfect	nrms	1990	1990-2015	All Crops	Default	OtherGrain	2006	90.2774	94.1964
Perfect	nrms	1990	1990-2015	All Crops	Default	OtherGrain	2007	92.6905	96.7144
Perfect	nrms	1990	1990-2015	All Crops	Default	OtherGrain	2008	90.3018	94.2219
Perfect	nrms	1990	1990-2015	All Crops	Default	OtherGrain	2009	90.5089	94.438
Perfect	nrms	1990	1990-2015	All Crops	Default	OtherGrain	2010	93.153	97.1969
Perfect	nrms	1990	1990-2015	All Crops	Default	OtherGrain	2011	92.1391	96.139
Perfect	nrms	1990	1990-2015	All Crops	Default	OtherGrain	2012	93.2961	97.3462
Perfect	nrms	1990	1990-2015	All Crops	Default	OtherGrain	2013	90.1281	94.0407
Perfect	nrms	1990	1990-2015	All Crops	Default	OtherGrain	2014	88.5178	92.3604
Perfect	nrms	1990	1990-2015	All Crops	Default	OtherGrain	2015	87.6736	91.4796
Perfect	nrms	1990	1990-2015	All Crops	Default	OilCrop	1990	239.728	245.898
Perfect	nrms	1990	1990-2015	All Crops	Default	OilCrop	1991	238.063	244.189
Perfect	nrms	1990	1990-2015	All Crops	Default	OilCrop	1992	239.255	245.412
Perfect	nrms	1990	1990-2015	All Crops	Default	OilCrop	1993	241.094	247.298
Perfect	nrms	1990	1990-2015	All Crops	Default	OilCrop	1994	240.381	246.567
Perfect	nrms	1990	1990-2015	All Crops	Default	OilCrop	1995	240.406	246.592
Perfect	nrms	1990	1990-2015	All Crops	Default	OilCrop	1996	240.404	246.59
Perfect	nrms	1990	1990-2015	All Crops	Default	OilCrop	1997	240.448	246.636
Perfect	nrms	1990	1990-2015	All Crops	Default	OilCrop	1998	236.018	242.092
Perfect	nrms	1990	1990-2015	All Crops	Default	OilCrop	1999	234.73	240.771
Perfect	nrms	1990	1990-2015	All Crops	Default	OilCrop	2000	234.365	240.397
Perfect	nrms	1990	1990-2015	All Crops	Default	OilCrop	2001	233.51	239.52
Perfect	nrms	1990	1990-2015	All Crops	Default	OilCrop	2002	236.405	242.489
Perfect	nrms	1990	1990-2015	All Crops	Default	OilCrop	2003	239.198	245.354
Perfect	nrms	1990	1990-2015	All Crops	Default	OilCrop	2004	239.562	245.727
Perfect	nrms	1990	1990-2015	All Crops	Default	OilCrop	2005	239.808	245.979
Perfect	nrms	1990	1990-2015	All Crops	Default	OilCrop	2006	238.902	245.05
Perfect	nrms	1990	1990-2015	All Crops	Default	OilCrop	2007	243.646	249.916
Perfect	nrms	1990	1990-2015	All Crops	Default	OilCrop	2008	241.785	248.008
Perfect	nrms	1990	1990-2015	All Crops	Default	OilCrop	2009	242.319	248.555
Perfect	nrms	1990	1990-2015	All Crops	Default	OilCrop	2010	244.772	251.071
Perfect	nrms	1990	1990-2015	All Crops	Default	OilCrop	2011	245.962	252.291
Perfect	nrms	1990	1990-2015	All Crops	Default	OilCrop	2012	246.548	252.893
Perfect	nrms	1990	1990-2015	All Crops	Default	OilCrop	2013	247.564	253.935
Perfect	nrms	1990	1990-2015	All Crops	Default	OilCrop	2014	245.959	252.288
Perfect	nrms	1990	1990-2015	All Crops	Default	OilCrop	2015	244.008	250.288
Perfect	nrms	1990	1990-2015	All Crops	Default	MiscCrop	1990	37.1549	39.1103
Perfect	nrms	1990	1990-2015	All Crops	Default	MiscCrop	1991	38.0215	40.0225
Perfect	nrms	1990	1990-2015	All Crops	Default	MiscCrop	1992	37.6943	39.6782
Perfect	nrms	1990	1990-2015	All Crops	Default	MiscCrop	1993	36.9271	38.8705
Perfect	nrms	1990	1990-2015	All Crops	Default	MiscCrop	1994	36.4656	38.3848
Perfect	nrms	1990	1990-2015	All Crops	Default	MiscCrop	1995	36.5433	38.4665
Perfect	nrms	1990	1990-2015	All Crops	Default	MiscCrop	1996	38.2208	40.2323
Perfect	nrms	1990	1990-2015	All Crops	Default	MiscCrop	1997	37.1133	39.0666
Perfect	nrms	1990	1990-2015	All Crops	Default	MiscCrop	1998	38.2044	40.2151
Perfect	nrms	1990	1990-2015	All Crops	Default	MiscCrop	1999	38.1784	40.1877
Perfect	nrms	1990	1990-2015	All Crops	Default	MiscCrop	2000	38.1086	40.1142
Perfect	nrms	1990	1990-2015	All Crops	Default	MiscCrop	2001	38.0385	40.0405
Perfect	nrms	1990	1990-2015	All Crops	Default	MiscCrop	2002	37.9966	39.9964
Perfect	nrms	1990	1990-2015	All Crops	Default	MiscCrop	2003	38.0577	40.0607
Perfect	nrms	1990	1990-2015	All Crops	Default	MiscCrop	2004	38.2152	40.2264
Perfect	nrms	1990	1990-2015	All Crops	Default	MiscCrop	2005	38.3151	40.3316
Perfect	nrms	1990	1990-2015	All Crops	Default	MiscCrop	2006	38.2693	40.2834
Perfect	nrms	1990	1990-2015	All Crops	Default	MiscCrop	2007	38.2035	40.2142
Perfect	nrms	1990	1990-2015	All Crops	Default	MiscCrop	2008	38.4286	40.4511
Perfect	nrms	1990	1990-2015	All Crops	Default	MiscCrop	2009	38.4537	40.4775
Perfect	nrms	1990	1990-2015	All Crops	Default	MiscCrop	2010	38.421	40.443
Perfect	nrms	1990	1990-2015	All Crops	Default	MiscCrop	2011	38.4007	40.4217
Perfect	nrms	1990	1990-2015	All Crops	Default	MiscCrop	2012	38.1862	40.1959
Perfect	nrms	1990	1990-2015	All Crops	Default	MiscCrop	2013	38.7092	40.7464
Perfect	nrms	1990	1990-2015	All Crops	Default	MiscCrop	2014	38.8384	40.8825
Perfect	nrms	1990	1990-2015	All Crops	Default	MiscCrop	2015	38.8701	40.9158
Perfect	nrms	1990	1990-2015	All Crops	Default	FodderHerb	1990	130.713	135.258
Perfect	nrms	1990	1990-2015	All Crops	Default	FodderHerb	1991	130.669	135.212
Perfect	nrms	1990	1990-2015	All Crops	Default	FodderHerb	1992	130.876	135.425
Perfect	nrms	1990	1990-2015	All Crops	Default	FodderHerb	1993	131.721	136.3
Perfect	nrms	1990	1990-2015	All Crops	Default	FodderHerb	1994	131.603	136.179
Perfect	nrms	1990	1990-2015	All Crops	Default	FodderHerb	1995	130.997	135.551
Perfect	nrms	1990	1990-2015	All Crops	Default	FodderHerb	1996	130.765	135.311
Perfect	nrms	1990	1990-2015	All Crops	Default	FodderHerb	1997	131.087	135.644
Perfect	nrms	1990	1990-2015	All Crops	Default	FodderHerb	1998	131.005	135.56
Perfect	nrms	1990	1990-2015	All Crops	Default	FodderHerb	1999	131.349	135.916
Perfect	nrms	1990	1990-2015	All Crops	Default	FodderHerb	2000	131.316	135.881
Perfect	nrms	1990	1990-2015	All Crops	Default	FodderHerb	2001	131.243	135.805
Perfect	nrms	1990	1990-2015	All Crops	Default	FodderHerb	2002	130.579	135.118
Perfect	nrms	1990	1990-2015	All Crops	Default	FodderHerb	2003	130.441	134.975
Perfect	nrms	1990	1990-2015	All Crops	Default	FodderHerb	2004	130.907	135.458
Perfect	nrms	1990	1990-2015	All Crops	Default	FodderHerb	2005	131.273	135.837
Perfect	nrms	1990	1990-2015	All Crops	Default	FodderHerb	2006	130.57	135.11
Perfect	nrms	1990	1990-2015	All Crops	Default	FodderHerb	2007	129.804	134.317
Perfect	nrms	1990	1990-2015	All Crops	Default	FodderHerb	2008	129.949	134.467
Perfect	nrms	1990	1990-2015	All Crops	Default	FodderHerb	2009	130.158	134.683
Perfect	nrms	1990	1990-2015	All Crops	Default	FodderHerb	2010	129.885	134.401
Perfect	nrms	1990	1990-2015	All Crops	Default	FodderHerb	2011	129.597	134.102
Perfect	nrms	1990	1990-2015	All Crops	Default	FodderHerb	2012	129.514	134.017
Perfect	nrms	1990	1990-2015	All Crops	Default	FodderHerb	2013	129.994	134.514
Perfect	nrms	1990	1990-2015	All Crops	Default	FodderHerb	2014	130.55	135.089
Perfect	nrms	1990	1990-2015	All Crops	Default	FodderHerb	2015	130.802	135.349
Perfect	nrms	1990	1990-2015	All Crops	Default	FodderGrass	1990	64.4678	65.55
Perfect	nrms	1990	1990-2015	All Crops	Default	FodderGrass	1991	64.4461	65.5279
Perfect	nrms	1990	1990-2015	All Crops	Default	FodderGrass	1992	64.5478	65.6313
Perfect	nrms	1990	1990-2015	All Crops	Default	FodderGrass	1993	64.9646	66.0551
Perfect	nrms	1990	1990-2015	All Crops	Default	FodderGrass	1994	64.9068	65.9963
Perfect	nrms	1990	1990-2015	All Crops	Default	FodderGrass	1995	64.6075	65.692
Perfect	nrms	1990	1990-2015	All Crops	Default	FodderGrass	1996	64.4932	65.5758
Perfect	nrms	1990	1990-2015	All Crops	Default	FodderGrass	1997	64.6519	65.7372
Perfect	nrms	1990	1990-2015	All Crops	Default	FodderGrass	1998	64.6118	65.6964
Perfect	nrms	1990	1990-2015	All Crops	Default	FodderGrass	1999	64.7814	65.8688
Perfect	nrms	1990	1990-2015	All Crops	Default	FodderGrass	2000	64.7649	65.852
Perfect	nrms	1990	1990-2015	All Crops	Default	FodderGrass	2001	64.7288	65.8154
Perfect	nrms	1990	1990-2015	All Crops	Default	FodderGrass	2002	64.4014	65.4824
Perfect	nrms	1990	1990-2015	All Crops	Default	FodderGrass	2003	64.3333	65.4132
Perfect	nrms	1990	1990-2015	All Crops	Default	FodderGrass	2004	64.5631	65.6469
Perfect	nrms	1990	1990-2015	All Crops	Default	FodderGrass	2005	64.7439	65.8307
Perfect	nrms	1990	1990-2015	All Crops	Default	FodderGrass	2006	64.3972	65.4782
Perfect	nrms	1990	1990-2015	All Crops	Default	FodderGrass	2007	64.0194	65.0941
Perfect	nrms	1990	1990-2015	All Crops	Default	FodderGrass	2008	64.0908	65.1667
Perfect	nrms	1990	1990-2015	All Crops	Default	FodderGrass	2009	64.1939	65.2715
Perfect	nrms	1990	1990-2015	All Crops	Default	FodderGrass	2010	64.0595	65.1348
Perfect	nrms	1990	1990-2015	All Crops	Default	FodderGrass	2011	63.9172	64.9901
Perfect	nrms	1990	1990-2015	All Crops	Default	FodderGrass	2012	63.8764	64.9486
Perfect	nrms	1990	1990-2015	All Crops	Default	FodderGrass	2013	64.1132	65.1894
Perfect	nrms	1990	1990-2015	All Crops	Default	FodderGrass	2014	64.3874	65.4682
Perfect	nrms	1990	1990-2015	All Crops	Default	FodderGrass	2015	64.5113	65.5942
Perfect	nrms	1990	1990-2015	All Crops	Default	FiberCrop	1990	46.9682	47.48
Perfect	nrms	1990	1990-2015	All Crops	Default	FiberCrop	1991	44.2772	44.7597
Perfect	nrms	1990	1990-2015	All Crops	Default	FiberCrop	1992	45.0608	45.5519
Perfect	nrms	1990	1990-2015	All Crops	Default	FiberCrop	1993	45.3611	45.8555
Perfect	nrms	1990	1990-2015	All Crops	Default	FiberCrop	1994	45.8629	46.3627
Perfect	nrms	1990	1990-2015	All Crops	Default	FiberCrop	1995	45.0237	45.5143
Perfect	nrms	1990	1990-2015	All Crops	Default	FiberCrop	1996	45.9678	46.4687
Perfect	nrms	1990	1990-2015	All Crops	Default	FiberCrop	1997	45.808	46.3072
Perfect	nrms	1990	1990-2015	All Crops	Default	FiberCrop	1998	45.7905	46.2895
Perfect	nrms	1990	1990-2015	All Crops	Default	FiberCrop	1999	44.2977	44.7804
Perfect	nrms	1990	1990-2015	All Crops	Default	FiberCrop	2000	44.754	45.2417
Perfect	nrms	1990	1990-2015	All Crops	Default	FiberCrop	2001	43.7856	44.2627
Perfect	nrms	1990	1990-2015	All Crops	Default	FiberCrop	2002	43.4948	43.9687
Perfect	nrms	1990	1990-2015	All Crops	Default	FiberCrop	2003	44.7335	45.221
Perfect	nrms	1990	1990-2015	All Crops	Default	FiberCrop	2004	44.9853	45.4756
Perfect	nrms	1990	1990-2015	All Crops	Default	FiberCrop	2005	43.6218	44.0972
Perfect	nrms	1990	1990-2015	All Crops	Default	FiberCrop	2006	43.9181	44.3967
Perfect	nrms	1990	1990-2015	All Crops	Default	FiberCrop	2007	45.0369	45.5277
Perfect	nrms	1990	1990-2015	All Crops	Default	FiberCrop	2008	45.4547	45.9501
Perfect	nrms	1990	1990-2015	All Crops	Default	FiberCrop	2009	44.8635	45.3524
Perfect	nrms	1990	1990-2015	All Crops	Default	FiberCrop	2010	45.3103	45.8041
Perfect	nrms	1990	1990-2015	All Crops	Default	FiberCrop	2011	46.9029	47.414
Perfect	nrms	1990	1990-2015	All Crops	Default	FiberCrop	2012	46.532	47.0391
Perfect	nrms	1990	1990-2015	All Crops	Default	FiberCrop	2013	46.5444	47.0516
Perfect	nrms	1990	1990-2015	All Crops	Default	FiberCrop	2014	45.5833	46.08
Perfect	nrms	1990	1990-2015	All Crops	Default	FiberCrop	2015	46.9791	47.4911
Perfect	nrms	1990	1990-2015	All Crops	Default	Corn	1990	267.418	273.719
Perfect	nrms	1990	1990-2015	All Crops	Default	Corn	1991	266.149	272.42
Perfect	nrms	1990	1990-2015	All Crops	Default	Corn	1992	265.483	271.738
Perfect	nrms	1990	1990-2015	All Crops	Default	Corn	1993	267.674	273.981
Perfect	nrms	1990	1990-2015	All Crops	Default	Corn	1994	268.9	275.235
Perfect	nrms	1990	1990-2015	All Crops	Default	Corn	1995	272.24	278.655
Perfect	nrms	1990	1990-2015	All Crops	Default	Corn	1996	274.899	281.376
Perfect	nrms	1990	1990-2015	All Crops	Default	Corn	1997	266.629	272.911
Perfect	nrms	1990	1990-2015	All Crops	Default	Corn	1998	261.15	267.303
Perfect	nrms	1990	1990-2015	All Crops	Default	Corn	1999	259.989	266.115
Perfect	nrms	1990	1990-2015	All Crops	Default	Corn	2000	259.465	265.578
Perfect	nrms	1990	1990-2015	All Crops	Default	Corn	2001	261.499	267.66
Perfect	nrms	1990	1990-2015	All Crops	Default	Corn	2002	264.483	270.714
Perfect	nrms	1990	1990-2015	All Crops	Default	Corn	2003	265.264	271.514
Perfect	nrms	1990	1990-2015	All Crops	Default	Corn	2004	261.832	268.001
Perfect	nrms	1990	1990-2015	All Crops	Default	Corn	2005	259.087	265.192
Perfect	nrms	1990	1990-2015	All Crops	Default	Corn	2006	268.145	274.463
Perfect	nrms	1990	1990-2015	All Crops	Default	Corn	2007	272.956	279.387
Perfect	nrms	1990	1990-2015	All Crops	Default	Corn	2008	269.854	276.212
Perfect	nrms	1990	1990-2015	All Crops	Default	Corn	2009	267.339	273.638
Perfect	nrms	1990	1990-2015	All Crops	Default	Corn	2010	275.76	282.258
Perfect	nrms	1990	1990-2015	All Crops	Default	Corn	2011	277.276	283.809
Perfect	nrms	1990	1990-2015	All Crops	Default	Corn	2012	276.127	282.633
Perfect	nrms	1990	1990-2015	All Crops	Default	Corn	2013	269.439	275.787
Perfect	nrms	1990	1990-2015	All Crops	Default	Corn	2014	265.145	271.392
Perfect	nrms	1990	1990-2015	All Crops	Default	Corn	2015	265.79	272.053
Perfect	nrms	1990	1990-2015	All Crops	Default	UnmanagedForest	1990	2327.69	NA
Perfect	nrms	1990	1990-2015	All Crops	Default	UnmanagedForest	1991	2508.11	NA
Perfect	nrms	1990	1990-2015	All Crops	Default	UnmanagedForest	1992	2205.22	NA
Perfect	nrms	1990	1990-2015	All Crops	Default	UnmanagedForest	1993	1543.54	NA
Perfect	nrms	1990	1990-2015	All Crops	Default	UnmanagedForest	1994	1624.03	NA
Perfect	nrms	1990	1990-2015	All Crops	Default	UnmanagedForest	1995	1739.07	NA
Perfect	nrms	1990	1990-2015	All Crops	Default	UnmanagedForest	1996	1779.23	NA
Perfect	nrms	1990	1990-2015	All Crops	Default	UnmanagedForest	1997	2082.56	NA
Perfect	nrms	1990	1990-2015	All Crops	Default	UnmanagedForest	1998	2679.15	NA
Perfect	nrms	1990	1990-2015	All Crops	Default	UnmanagedForest	1999	2618.53	NA
Perfect	nrms	1990	1990-2015	All Crops	Default	UnmanagedForest	2000	2584.9	NA
Perfect	nrms	1990	1990-2015	All Crops	Default	UnmanagedForest	2001	2733.27	NA
Perfect	nrms	1990	1990-2015	All Crops	Default	UnmanagedForest	2002	2759.17	NA
Perfect	nrms	1990	1990-2015	All Crops	Default	UnmanagedForest	2003	2678.78	NA
Perfect	nrms	1990	1990-2015	All Crops	Default	UnmanagedForest	2004	2489.03	NA
Perfect	nrms	1990	1990-2015	All Crops	Default	UnmanagedForest	2005	2447.24	NA
Perfect	nrms	1990	1990-2015	All Crops	Default	UnmanagedForest	2006	2465.15	NA
Perfect	nrms	1990	1990-2015	All Crops	Default	UnmanagedForest	2007	2342.99	NA
Perfect	nrms	1990	1990-2015	All Crops	Default	UnmanagedForest	2008	2460.46	NA
Perfect	nrms	1990	1990-2015	All Crops	Default	UnmanagedForest	2009	2669.66	NA
Perfect	nrms	1990	1990-2015	All Crops	Default	UnmanagedForest	2010	2206.37	NA
Perfect	nrms	1990	1990-2015	All Crops	Default	UnmanagedForest	2011	2228.36	NA
Perfect	nrms	1990	1990-2015	All Crops	Default	UnmanagedForest	2012	2229.3	NA
Perfect	nrms	1990	1990-2015	All Crops	Default	UnmanagedForest	2013	2223.8	NA
Perfect	nrms	1990	1990-2015	All Crops	Default	UnmanagedForest	2014	2217.37	NA
Perfect	nrms	1990	1990-2015	All Crops	Default	UnmanagedForest	2015	2214.45	NA
Perfect	nrms	1990	1990-2015	All Crops	Default	Forest	1990	655.518	655.518
Perfect	nrms	1990	1990-2015	All Crops	Default	Forest	1991	467.155	467.155
Perfect	nrms	1990	1990-2015	All Crops	Default	Forest	1992	781.573	781.573
Perfect	nrms	1990	1990-2015	All Crops	Default	Forest	1993	1470.34	1470.34
Perfect	nrms	1990	1990-2015	All Crops	Default	Forest	1994	1385.97	1385.97
Perfect	nrms	1990	1990-2015	All Crops	Default	Forest	1995	1272.8	1272.8
Perfect	nrms	1990	1990-2015	All Crops	Default	Forest	1996	1233.74	1233.74
Perfect	nrms	1990	1990-2015	All Crops	Default	Forest	1997	907.377	907.377
Perfect	nrms	1990	1990-2015	All Crops	Default	Forest	1998	282.734	282.734
Perfect	nrms	1990	1990-2015	All Crops	Default	Forest	1999	340.249	340.249
Perfect	nrms	1990	1990-2015	All Crops	Default	Forest	2000	375.986	375.986
Perfect	nrms	1990	1990-2015	All Crops	Default	Forest	2001	222.201	222.201
Perfect	nrms	1990	1990-2015	All Crops	Default	Forest	2002	206.435	206.435
Perfect	nrms	1990	1990-2015	All Crops	Default	Forest	2003	292.615	292.615
Perfect	nrms	1990	1990-2015	All Crops	Default	Forest	2004	483.179	483.179
Perfect	nrms	1990	1990-2015	All Crops	Default	Forest	2005	520.833	520.833
Perfect	nrms	1990	1990-2015	All Crops	Default	Forest	2006	513.775	513.775
Perfect	nrms	1990	1990-2015	All Crops	Default	Forest	2007	654.304	654.304
Perfect	nrms	1990	1990-2015	All Crops	Default	Forest	2008	528.899	528.899
Perfect	nrms	1990	1990-2015	All Crops	Default	Forest	2009	306.853	306.853
Perfect	nrms	1990	1990-2015	All Crops	Default	Forest	2010	796.406	796.406
Perfect	nrms	1990	1990-2015	All Crops	Default	Forest	2011	777.927	777.927
Perfect	nrms	1990	1990-2015	All Crops	Default	Forest	2012	778.257	778.257
Perfect	nrms	1990	1990-2015	All Crops	Default	Forest	2013	776.335	776.335
Perfect	nrms	1990	1990-2015	All Crops	Default	Forest	2014	774.091	774.091
Perfect	nrms	1990	1990-2015	All Crops	Default	Forest	2015	773.071	773.071
Hybrid Linear Adaptive	nrms	1990	1990-2015	All Crops	Default	UrbanLand	1990	116.34	NA
Hybrid Linear Adaptive	nrms	1990	1990-2015	All Crops	Default	UrbanLand	1991	116.34	NA
Hybrid Linear Adaptive	nrms	1990	1990-2015	All Crops	Default	UrbanLand	1992	116.34	NA
Hybrid Linear Adaptive	nrms	1990	1990-2015	All Crops	Default	UrbanLand	1993	116.34	NA
Hybrid Linear Adaptive	nrms	1990	1990-2015	All Crops	Default	UrbanLand	1994	116.34	NA
Hybrid Linear Adaptive	nrms	1990	1990-2015	All Crops	Default	UrbanLand	1995	116.34	NA
Hybrid Linear Adaptive	nrms	1990	1990-2015	All Crops	Default	UrbanLand	1996	116.34	NA
Hybrid Linear Adaptive	nrms	1990	1990-2015	All Crops	Default	UrbanLand	1997	116.34	NA
Hybrid Linear Adaptive	nrms	1990	1990-2015	All Crops	Default	UrbanLand	1998	116.34	NA
Hybrid Linear Adaptive	nrms	1990	1990-2015	All Crops	Default	UrbanLand	1999	116.34	NA
Hybrid Linear Adaptive	nrms	1990	1990-2015	All Crops	Default	UrbanLand	2000	116.34	NA
Hybrid Linear Adaptive	nrms	1990	1990-2015	All Crops	Default	UrbanLand	2001	116.34	NA
Hybrid Linear Adaptive	nrms	1990	1990-2015	All Crops	Default	UrbanLand	2002	116.34	NA
Hybrid Linear Adaptive	nrms	1990	1990-2015	All Crops	Default	UrbanLand	2003	116.34	NA
Hybrid Linear Adaptive	nrms	1990	1990-2015	All Crops	Default	UrbanLand	2004	116.34	NA
Hybrid Linear Adaptive	nrms	1990	1990-2015	All Crops	Default	UrbanLand	2005	116.34	NA
Hybrid Linear Adaptive	nrms	1990	1990-2015	All Crops	Default	UrbanLand	2006	116.34	NA
Hybrid Linear Adaptive	nrms	1990	1990-2015	All Crops	Default	UrbanLand	2007	116.34	NA
Hybrid Linear Adaptive	nrms	1990	1990-2015	All Crops	Default	UrbanLand	2008	116.34	NA
Hybrid Linear Adaptive	nrms	1990	1990-2015	All Crops	Default	UrbanLand	2009	116.34	NA
Hybrid Linear Adaptive	nrms	1990	1990-2015	All Crops	Default	UrbanLand	2010	116.34	NA
Hybrid Linear Adaptive	nrms	1990	1990-2015	All Crops	Default	UrbanLand	2011	116.34	NA
Hybrid Linear Adaptive	nrms	1990	1990-2015	All Crops	Default	UrbanLand	2012	116.34	NA
Hybrid Linear Adaptive	nrms	1990	1990-2015	All Crops	Default	UrbanLand	2013	116.34	NA
Hybrid Linear Adaptive	nrms	1990	1990-2015	All Crops	Default	UrbanLand	2014	116.34	NA
Hybrid Linear Adaptive	nrms	1990	1990-2015	All Crops	Default	UrbanLand	2015	116.34	NA
Hybrid Linear Adaptive	nrms	1990	1990-2015	All Crops	Default	Tundra	1990	240.732	NA
Hybrid Linear Adaptive	nrms	1990	1990-2015	All Crops	Default	Tundra	1991	240.732	NA
Hybrid Linear Adaptive	nrms	1990	1990-2015	All Crops	Default	Tundra	1992	240.732	NA
Hybrid Linear Adaptive	nrms	1990	1990-2015	All Crops	Default	Tundra	1993	240.732	NA
Hybrid Linear Adaptive	nrms	1990	1990-2015	All Crops	Default	Tundra	1994	240.732	NA
Hybrid Linear Adaptive	nrms	1990	1990-2015	All Crops	Default	Tundra	1995	240.732	NA
Hybrid Linear Adaptive	nrms	1990	1990-2015	All Crops	Default	Tundra	1996	240.732	NA
Hybrid Linear Adaptive	nrms	1990	1990-2015	All Crops	Default	Tundra	1997	240.732	NA
Hybrid Linear Adaptive	nrms	1990	1990-2015	All Crops	Default	Tundra	1998	240.732	NA
Hybrid Linear Adaptive	nrms	1990	1990-2015	All Crops	Default	Tundra	1999	240.732	NA
Hybrid Linear Adaptive	nrms	1990	1990-2015	All Crops	Default	Tundra	2000	240.732	NA
Hybrid Linear Adaptive	nrms	1990	1990-2015	All Crops	Default	Tundra	2001	240.732	NA
Hybrid Linear Adaptive	nrms	1990	1990-2015	All Crops	Default	Tundra	2002	240.732	NA
Hybrid Linear Adaptive	nrms	1990	1990-2015	All Crops	Default	Tundra	2003	240.732	NA
Hybrid Linear Adaptive	nrms	1990	1990-2015	All Crops	Default	Tundra	2004	240.732	NA
Hybrid Linear Adaptive	nrms	1990	1990-2015	All Crops	Default	Tundra	2005	240.732	NA
Hybrid Linear Adaptive	nrms	1990	1990-2015	All Crops	Default	Tundra	2006	240.732	NA
Hybrid Linear Adaptive	nrms	1990	1990-2015	All Crops	Default	Tundra	2007	240.732	NA
Hybrid Linear Adaptive	nrms	1990	1990-2015	All Crops	Default	Tundra	2008	240.732	NA
Hybrid Linear Adaptive	nrms	1990	1990-2015	All Crops	Default	Tundra	2009	240.732	NA
Hybrid Linear Adaptive	nrms	1990	1990-2015	All Crops	Default	Tundra	2010	240.732	NA
Hybrid Linear Adaptive	nrms	1990	1990-2015	All Crops	Default	Tundra	2011	240.732	NA
Hybrid Linear Adaptive	nrms	1990	1990-2015	All Crops	Default	Tundra	2012	240.732	NA
Hybrid Linear Adaptive	nrms	1990	1990-2015	All Crops	Default	Tundra	2013	240.732	NA
Hybrid Linear Adaptive	nrms	1990	1990-2015	All Crops	Default	Tundra	2014	240.732	NA
Hybrid Linear Adaptive	nrms	1990	1990-2015	All Crops	Default	Tundra	2015	240.732	NA
Hybrid Linear Adaptive	nrms	1990	1990-2015	All Crops	Default	RockIceDesert	1990	34.1785	NA
Hybrid Linear Adaptive	nrms	1990	1990-2015	All Crops	Default	RockIceDesert	1991	34.1785	NA
Hybrid Linear Adaptive	nrms	1990	1990-2015	All Crops	Default	RockIceDesert	1992	34.1785	NA
Hybrid Linear Adaptive	nrms	1990	1990-2015	All Crops	Default	RockIceDesert	1993	34.1785	NA
Hybrid Linear Adaptive	nrms	1990	1990-2015	All Crops	Default	RockIceDesert	1994	34.1785	NA
Hybrid Linear Adaptive	nrms	1990	1990-2015	All Crops	Default	RockIceDesert	1995	34.1785	NA
Hybrid Linear Adaptive	nrms	1990	1990-2015	All Crops	Default	RockIceDesert	1996	34.1785	NA
Hybrid Linear Adaptive	nrms	1990	1990-2015	All Crops	Default	RockIceDesert	1997	34.1785	NA
Hybrid Linear Adaptive	nrms	1990	1990-2015	All Crops	Default	RockIceDesert	1998	34.1785	NA
Hybrid Linear Adaptive	nrms	1990	1990-2015	All Crops	Default	RockIceDesert	1999	34.1785	NA
Hybrid Linear Adaptive	nrms	1990	1990-2015	All Crops	Default	RockIceDesert	2000	34.1785	NA
Hybrid Linear Adaptive	nrms	1990	1990-2015	All Crops	Default	RockIceDesert	2001	34.1785	NA
Hybrid Linear Adaptive	nrms	1990	1990-2015	All Crops	Default	RockIceDesert	2002	34.1785	NA
Hybrid Linear Adaptive	nrms	1990	1990-2015	All Crops	Default	RockIceDesert	2003	34.1785	NA
Hybrid Linear Adaptive	nrms	1990	1990-2015	All Crops	Default	RockIceDesert	2004	34.1785	NA
Hybrid Linear Adaptive	nrms	1990	1990-2015	All Crops	Default	RockIceDesert	2005	34.1785	NA
Hybrid Linear Adaptive	nrms	1990	1990-2015	All Crops	Default	RockIceDesert	2006	34.1785	NA
Hybrid Linear Adaptive	nrms	1990	1990-2015	All Crops	Default	RockIceDesert	2007	34.1785	NA
Hybrid Linear Adaptive	nrms	1990	1990-2015	All Crops	Default	RockIceDesert	2008	34.1785	NA
Hybrid Linear Adaptive	nrms	1990	1990-2015	All Crops	Default	RockIceDesert	2009	34.1785	NA
Hybrid Linear Adaptive	nrms	1990	1990-2015	All Crops	Default	RockIceDesert	2010	34.1785	NA
Hybrid Linear Adaptive	nrms	1990	1990-2015	All Crops	Default	RockIceDesert	2011	34.1785	NA
Hybrid Linear Adaptive	nrms	1990	1990-2015	All Crops	Default	RockIceDesert	2012	34.1785	NA
Hybrid Linear Adaptive	nrms	1990	1990-2015	All Crops	Default	RockIceDesert	2013	34.1785	NA
Hybrid Linear Adaptive	nrms	1990	1990-2015	All Crops	Default	RockIceDesert	2014	34.1785	NA
Hybrid Linear Adaptive	nrms	1990	1990-2015	All Crops	Default	RockIceDesert	2015	34.1785	NA
Hybrid Linear Adaptive	nrms	1990	1990-2015	All Crops	Default	UnmanagedPasture	1990	2313.1	NA
Hybrid Linear Adaptive	nrms	1990	1990-2015	All Crops	Default	UnmanagedPasture	1991	2309.09	NA
Hybrid Linear Adaptive	nrms	1990	1990-2015	All Crops	Default	UnmanagedPasture	1992	2310.62	NA
Hybrid Linear Adaptive	nrms	1990	1990-2015	All Crops	Default	UnmanagedPasture	1993	2305.5	NA
Hybrid Linear Adaptive	nrms	1990	1990-2015	All Crops	Default	UnmanagedPasture	1994	2297.82	NA
Hybrid Linear Adaptive	nrms	1990	1990-2015	All Crops	Default	UnmanagedPasture	1995	2292.26	NA
Hybrid Linear Adaptive	nrms	1990	1990-2015	All Crops	Default	UnmanagedPasture	1996	2282.11	NA
Hybrid Linear Adaptive	nrms	1990	1990-2015	All Crops	Default	UnmanagedPasture	1997	2267.46	NA
Hybrid Linear Adaptive	nrms	1990	1990-2015	All Crops	Default	UnmanagedPasture	1998	2262.86	NA
Hybrid Linear Adaptive	nrms	1990	1990-2015	All Crops	Default	UnmanagedPasture	1999	2272.34	NA
Hybrid Linear Adaptive	nrms	1990	1990-2015	All Crops	Default	UnmanagedPasture	2000	2285.85	NA
Hybrid Linear Adaptive	nrms	1990	1990-2015	All Crops	Default	UnmanagedPasture	2001	2298.32	NA
Hybrid Linear Adaptive	nrms	1990	1990-2015	All Crops	Default	UnmanagedPasture	2002	2299.49	NA
Hybrid Linear Adaptive	nrms	1990	1990-2015	All Crops	Default	UnmanagedPasture	2003	2309.25	NA
Hybrid Linear Adaptive	nrms	1990	1990-2015	All Crops	Default	UnmanagedPasture	2004	2309.51	NA
Hybrid Linear Adaptive	nrms	1990	1990-2015	All Crops	Default	UnmanagedPasture	2005	2317.09	NA
Hybrid Linear Adaptive	nrms	1990	1990-2015	All Crops	Default	UnmanagedPasture	2006	2324.76	NA
Hybrid Linear Adaptive	nrms	1990	1990-2015	All Crops	Default	UnmanagedPasture	2007	2327.38	NA
Hybrid Linear Adaptive	nrms	1990	1990-2015	All Crops	Default	UnmanagedPasture	2008	2337.35	NA
Hybrid Linear Adaptive	nrms	1990	1990-2015	All Crops	Default	UnmanagedPasture	2009	2310.13	NA
Hybrid Linear Adaptive	nrms	1990	1990-2015	All Crops	Default	UnmanagedPasture	2010	2301.94	NA
Hybrid Linear Adaptive	nrms	1990	1990-2015	All Crops	Default	UnmanagedPasture	2011	2350.79	NA
Hybrid Linear Adaptive	nrms	1990	1990-2015	All Crops	Default	UnmanagedPasture	2012	2290.84	NA
Hybrid Linear Adaptive	nrms	1990	1990-2015	All Crops	Default	UnmanagedPasture	2013	2269.38	NA
Hybrid Linear Adaptive	nrms	1990	1990-2015	All Crops	Default	UnmanagedPasture	2014	2261.58	NA
Hybrid Linear Adaptive	nrms	1990	1990-2015	All Crops	Default	UnmanagedPasture	2015	2255.21	NA
Hybrid Linear Adaptive	nrms	1990	1990-2015	All Crops	Default	Pasture	1990	67.8453	67.8453
Hybrid Linear Adaptive	nrms	1990	1990-2015	All Crops	Default	Pasture	1991	67.7277	67.7277
Hybrid Linear Adaptive	nrms	1990	1990-2015	All Crops	Default	Pasture	1992	67.7725	67.7725
Hybrid Linear Adaptive	nrms	1990	1990-2015	All Crops	Default	Pasture	1993	67.6223	67.6223
Hybrid Linear Adaptive	nrms	1990	1990-2015	All Crops	Default	Pasture	1994	67.3971	67.3971
Hybrid Linear Adaptive	nrms	1990	1990-2015	All Crops	Default	Pasture	1995	67.2341	67.2341
Hybrid Linear Adaptive	nrms	1990	1990-2015	All Crops	Default	Pasture	1996	66.9361	66.9361
Hybrid Linear Adaptive	nrms	1990	1990-2015	All Crops	Default	Pasture	1997	66.5065	66.5065
Hybrid Linear Adaptive	nrms	1990	1990-2015	All Crops	Default	Pasture	1998	66.3715	66.3715
Hybrid Linear Adaptive	nrms	1990	1990-2015	All Crops	Default	Pasture	1999	66.6497	66.6497
Hybrid Linear Adaptive	nrms	1990	1990-2015	All Crops	Default	Pasture	2000	67.0459	67.0459
Hybrid Linear Adaptive	nrms	1990	1990-2015	All Crops	Default	Pasture	2001	67.4118	67.4118
Hybrid Linear Adaptive	nrms	1990	1990-2015	All Crops	Default	Pasture	2002	67.446	67.446
Hybrid Linear Adaptive	nrms	1990	1990-2015	All Crops	Default	Pasture	2003	67.7323	67.7323
Hybrid Linear Adaptive	nrms	1990	1990-2015	All Crops	Default	Pasture	2004	67.7398	67.7398
Hybrid Linear Adaptive	nrms	1990	1990-2015	All Crops	Default	Pasture	2005	67.9622	67.9622
Hybrid Linear Adaptive	nrms	1990	1990-2015	All Crops	Default	Pasture	2006	68.1872	68.1872
Hybrid Linear Adaptive	nrms	1990	1990-2015	All Crops	Default	Pasture	2007	68.264	68.264
Hybrid Linear Adaptive	nrms	1990	1990-2015	All Crops	Default	Pasture	2008	68.5566	68.5566
Hybrid Linear Adaptive	nrms	1990	1990-2015	All Crops	Default	Pasture	2009	67.7582	67.7582
Hybrid Linear Adaptive	nrms	1990	1990-2015	All Crops	Default	Pasture	2010	67.518	67.518
Hybrid Linear Adaptive	nrms	1990	1990-2015	All Crops	Default	Pasture	2011	68.9506	68.9506
Hybrid Linear Adaptive	nrms	1990	1990-2015	All Crops	Default	Pasture	2012	67.1922	67.1922
Hybrid Linear Adaptive	nrms	1990	1990-2015	All Crops	Default	Pasture	2013	66.5628	66.5628
Hybrid Linear Adaptive	nrms	1990	1990-2015	All Crops	Default	Pasture	2014	66.3342	66.3342
Hybrid Linear Adaptive	nrms	1990	1990-2015	All Crops	Default	Pasture	2015	66.1473	66.1473
Hybrid Linear Adaptive	nrms	1990	1990-2015	All Crops	Default	Shrubland	1990	742.798	NA
Hybrid Linear Adaptive	nrms	1990	1990-2015	All Crops	Default	Shrubland	1991	740.964	NA
Hybrid Linear Adaptive	nrms	1990	1990-2015	All Crops	Default	Shrubland	1992	741.662	NA
Hybrid Linear Adaptive	nrms	1990	1990-2015	All Crops	Default	Shrubland	1993	739.321	NA
Hybrid Linear Adaptive	nrms	1990	1990-2015	All Crops	Default	Shrubland	1994	735.817	NA
Hybrid Linear Adaptive	nrms	1990	1990-2015	All Crops	Default	Shrubland	1995	733.284	NA
Hybrid Linear Adaptive	nrms	1990	1990-2015	All Crops	Default	Shrubland	1996	728.663	NA
Hybrid Linear Adaptive	nrms	1990	1990-2015	All Crops	Default	Shrubland	1997	722.02	NA
Hybrid Linear Adaptive	nrms	1990	1990-2015	All Crops	Default	Shrubland	1998	719.937	NA
Hybrid Linear Adaptive	nrms	1990	1990-2015	All Crops	Default	Shrubland	1999	724.232	NA
Hybrid Linear Adaptive	nrms	1990	1990-2015	All Crops	Default	Shrubland	2000	730.364	NA
Hybrid Linear Adaptive	nrms	1990	1990-2015	All Crops	Default	Shrubland	2001	736.045	NA
Hybrid Linear Adaptive	nrms	1990	1990-2015	All Crops	Default	Shrubland	2002	736.578	NA
Hybrid Linear Adaptive	nrms	1990	1990-2015	All Crops	Default	Shrubland	2003	741.036	NA
Hybrid Linear Adaptive	nrms	1990	1990-2015	All Crops	Default	Shrubland	2004	741.152	NA
Hybrid Linear Adaptive	nrms	1990	1990-2015	All Crops	Default	Shrubland	2005	744.623	NA
Hybrid Linear Adaptive	nrms	1990	1990-2015	All Crops	Default	Shrubland	2006	748.139	NA
Hybrid Linear Adaptive	nrms	1990	1990-2015	All Crops	Default	Shrubland	2007	749.341	NA
Hybrid Linear Adaptive	nrms	1990	1990-2015	All Crops	Default	Shrubland	2008	753.927	NA
Hybrid Linear Adaptive	nrms	1990	1990-2015	All Crops	Default	Shrubland	2009	741.438	NA
Hybrid Linear Adaptive	nrms	1990	1990-2015	All Crops	Default	Shrubland	2010	737.697	NA
Hybrid Linear Adaptive	nrms	1990	1990-2015	All Crops	Default	Shrubland	2011	760.12	NA
Hybrid Linear Adaptive	nrms	1990	1990-2015	All Crops	Default	Shrubland	2012	732.634	NA
Hybrid Linear Adaptive	nrms	1990	1990-2015	All Crops	Default	Shrubland	2013	722.889	NA
Hybrid Linear Adaptive	nrms	1990	1990-2015	All Crops	Default	Shrubland	2014	719.362	NA
Hybrid Linear Adaptive	nrms	1990	1990-2015	All Crops	Default	Shrubland	2015	716.483	NA
Hybrid Linear Adaptive	nrms	1990	1990-2015	All Crops	Default	Grassland	1990	588.538	NA
Hybrid Linear Adaptive	nrms	1990	1990-2015	All Crops	Default	Grassland	1991	587.085	NA
Hybrid Linear Adaptive	nrms	1990	1990-2015	All Crops	Default	Grassland	1992	587.638	NA
Hybrid Linear Adaptive	nrms	1990	1990-2015	All Crops	Default	Grassland	1993	585.783	NA
Hybrid Linear Adaptive	nrms	1990	1990-2015	All Crops	Default	Grassland	1994	583.007	NA
Hybrid Linear Adaptive	nrms	1990	1990-2015	All Crops	Default	Grassland	1995	581	NA
Hybrid Linear Adaptive	nrms	1990	1990-2015	All Crops	Default	Grassland	1996	577.339	NA
Hybrid Linear Adaptive	nrms	1990	1990-2015	All Crops	Default	Grassland	1997	572.075	NA
Hybrid Linear Adaptive	nrms	1990	1990-2015	All Crops	Default	Grassland	1998	570.425	NA
Hybrid Linear Adaptive	nrms	1990	1990-2015	All Crops	Default	Grassland	1999	573.828	NA
Hybrid Linear Adaptive	nrms	1990	1990-2015	All Crops	Default	Grassland	2000	578.686	NA
Hybrid Linear Adaptive	nrms	1990	1990-2015	All Crops	Default	Grassland	2001	583.188	NA
Hybrid Linear Adaptive	nrms	1990	1990-2015	All Crops	Default	Grassland	2002	583.61	NA
Hybrid Linear Adaptive	nrms	1990	1990-2015	All Crops	Default	Grassland	2003	587.142	NA
Hybrid Linear Adaptive	nrms	1990	1990-2015	All Crops	Default	Grassland	2004	587.234	NA
Hybrid Linear Adaptive	nrms	1990	1990-2015	All Crops	Default	Grassland	2005	589.984	NA
Hybrid Linear Adaptive	nrms	1990	1990-2015	All Crops	Default	Grassland	2006	592.77	NA
Hybrid Linear Adaptive	nrms	1990	1990-2015	All Crops	Default	Grassland	2007	593.722	NA
Hybrid Linear Adaptive	nrms	1990	1990-2015	All Crops	Default	Grassland	2008	597.356	NA
Hybrid Linear Adaptive	nrms	1990	1990-2015	All Crops	Default	Grassland	2009	587.461	NA
Hybrid Linear Adaptive	nrms	1990	1990-2015	All Crops	Default	Grassland	2010	584.497	NA
Hybrid Linear Adaptive	nrms	1990	1990-2015	All Crops	Default	Grassland	2011	602.263	NA
Hybrid Linear Adaptive	nrms	1990	1990-2015	All Crops	Default	Grassland	2012	580.485	NA
Hybrid Linear Adaptive	nrms	1990	1990-2015	All Crops	Default	Grassland	2013	572.764	NA
Hybrid Linear Adaptive	nrms	1990	1990-2015	All Crops	Default	Grassland	2014	569.969	NA
Hybrid Linear Adaptive	nrms	1990	1990-2015	All Crops	Default	Grassland	2015	567.688	NA
Hybrid Linear Adaptive	nrms	1990	1990-2015	All Crops	Default	OtherArableLand	1990	685.461	NA
Hybrid Linear Adaptive	nrms	1990	1990-2015	All Crops	Default	OtherArableLand	1991	687.766	NA
Hybrid Linear Adaptive	nrms	1990	1990-2015	All Crops	Default	OtherArableLand	1992	685.947	NA
Hybrid Linear Adaptive	nrms	1990	1990-2015	All Crops	Default	OtherArableLand	1993	688.234	NA
Hybrid Linear Adaptive	nrms	1990	1990-2015	All Crops	Default	OtherArableLand	1994	684.392	NA
Hybrid Linear Adaptive	nrms	1990	1990-2015	All Crops	Default	OtherArableLand	1995	679.988	NA
Hybrid Linear Adaptive	nrms	1990	1990-2015	All Crops	Default	OtherArableLand	1996	683.18	NA
Hybrid Linear Adaptive	nrms	1990	1990-2015	All Crops	Default	OtherArableLand	1997	692.588	NA
Hybrid Linear Adaptive	nrms	1990	1990-2015	All Crops	Default	OtherArableLand	1998	695.131	NA
Hybrid Linear Adaptive	nrms	1990	1990-2015	All Crops	Default	OtherArableLand	1999	689.034	NA
Hybrid Linear Adaptive	nrms	1990	1990-2015	All Crops	Default	OtherArableLand	2000	677.271	NA
Hybrid Linear Adaptive	nrms	1990	1990-2015	All Crops	Default	OtherArableLand	2001	665.989	NA
Hybrid Linear Adaptive	nrms	1990	1990-2015	All Crops	Default	OtherArableLand	2002	669.591	NA
Hybrid Linear Adaptive	nrms	1990	1990-2015	All Crops	Default	OtherArableLand	2003	663.124	NA
Hybrid Linear Adaptive	nrms	1990	1990-2015	All Crops	Default	OtherArableLand	2004	666.291	NA
Hybrid Linear Adaptive	nrms	1990	1990-2015	All Crops	Default	OtherArableLand	2005	658.454	NA
Hybrid Linear Adaptive	nrms	1990	1990-2015	All Crops	Default	OtherArableLand	2006	649.977	NA
Hybrid Linear Adaptive	nrms	1990	1990-2015	All Crops	Default	OtherArableLand	2007	647.462	NA
Hybrid Linear Adaptive	nrms	1990	1990-2015	All Crops	Default	OtherArableLand	2008	634.64	NA
Hybrid Linear Adaptive	nrms	1990	1990-2015	All Crops	Default	OtherArableLand	2009	666.888	NA
Hybrid Linear Adaptive	nrms	1990	1990-2015	All Crops	Default	OtherArableLand	2010	679.317	NA
Hybrid Linear Adaptive	nrms	1990	1990-2015	All Crops	Default	OtherArableLand	2011	619.3	NA
Hybrid Linear Adaptive	nrms	1990	1990-2015	All Crops	Default	OtherArableLand	2012	686.81	NA
Hybrid Linear Adaptive	nrms	1990	1990-2015	All Crops	Default	OtherArableLand	2013	709.012	NA
Hybrid Linear Adaptive	nrms	1990	1990-2015	All Crops	Default	OtherArableLand	2014	715.711	NA
Hybrid Linear Adaptive	nrms	1990	1990-2015	All Crops	Default	OtherArableLand	2015	720.909	NA
Hybrid Linear Adaptive	nrms	1990	1990-2015	All Crops	Default	Wheat	1990	266.987	279.65
Hybrid Linear Adaptive	nrms	1990	1990-2015	All Crops	Default	Wheat	1991	268.266	280.989
Hybrid Linear Adaptive	nrms	1990	1990-2015	All Crops	Default	Wheat	1992	266.848	279.504
Hybrid Linear Adaptive	nrms	1990	1990-2015	All Crops	Default	Wheat	1993	268.152	280.87
Hybrid Linear Adaptive	nrms	1990	1990-2015	All Crops	Default	Wheat	1994	265.72	278.322
Hybrid Linear Adaptive	nrms	1990	1990-2015	All Crops	Default	Wheat	1995	263.092	275.57
Hybrid Linear Adaptive	nrms	1990	1990-2015	All Crops	Default	Wheat	1996	264.259	276.792
Hybrid Linear Adaptive	nrms	1990	1990-2015	All Crops	Default	Wheat	1997	268.685	281.428
Hybrid Linear Adaptive	nrms	1990	1990-2015	All Crops	Default	Wheat	1998	271.654	284.538
Hybrid Linear Adaptive	nrms	1990	1990-2015	All Crops	Default	Wheat	1999	269.154	281.92
Hybrid Linear Adaptive	nrms	1990	1990-2015	All Crops	Default	Wheat	2000	263.069	275.546
Hybrid Linear Adaptive	nrms	1990	1990-2015	All Crops	Default	Wheat	2001	256.465	268.628
Hybrid Linear Adaptive	nrms	1990	1990-2015	All Crops	Default	Wheat	2002	258.237	270.485
Hybrid Linear Adaptive	nrms	1990	1990-2015	All Crops	Default	Wheat	2003	252.586	264.566
Hybrid Linear Adaptive	nrms	1990	1990-2015	All Crops	Default	Wheat	2004	253.795	265.831
Hybrid Linear Adaptive	nrms	1990	1990-2015	All Crops	Default	Wheat	2005	248.984	260.793
Hybrid Linear Adaptive	nrms	1990	1990-2015	All Crops	Default	Wheat	2006	244.661	256.265
Hybrid Linear Adaptive	nrms	1990	1990-2015	All Crops	Default	Wheat	2007	242.429	253.926
Hybrid Linear Adaptive	nrms	1990	1990-2015	All Crops	Default	Wheat	2008	232.498	243.524
Hybrid Linear Adaptive	nrms	1990	1990-2015	All Crops	Default	Wheat	2009	251.484	263.412
Hybrid Linear Adaptive	nrms	1990	1990-2015	All Crops	Default	Wheat	2010	258.689	270.958
Hybrid Linear Adaptive	nrms	1990	1990-2015	All Crops	Default	Wheat	2011	233.762	244.848
Hybrid Linear Adaptive	nrms	1990	1990-2015	All Crops	Default	Wheat	2012	261.379	273.775
Hybrid Linear Adaptive	nrms	1990	1990-2015	All Crops	Default	Wheat	2013	272.856	285.797
Hybrid Linear Adaptive	nrms	1990	1990-2015	All Crops	Default	Wheat	2014	277.563	290.728
Hybrid Linear Adaptive	nrms	1990	1990-2015	All Crops	Default	Wheat	2015	281.154	294.489
Hybrid Linear Adaptive	nrms	1990	1990-2015	All Crops	Default	SugarCrop	1990	8.60991	8.97046
Hybrid Linear Adaptive	nrms	1990	1990-2015	All Crops	Default	SugarCrop	1991	8.62998	8.99137
Hybrid Linear Adaptive	nrms	1990	1990-2015	All Crops	Default	SugarCrop	1992	8.61223	8.97288
Hybrid Linear Adaptive	nrms	1990	1990-2015	All Crops	Default	SugarCrop	1993	8.63475	8.99634
Hybrid Linear Adaptive	nrms	1990	1990-2015	All Crops	Default	SugarCrop	1994	8.56106	8.91956
Hybrid Linear Adaptive	nrms	1990	1990-2015	All Crops	Default	SugarCrop	1995	8.50256	8.85862
Hybrid Linear Adaptive	nrms	1990	1990-2015	All Crops	Default	SugarCrop	1996	8.52368	8.88062
Hybrid Linear Adaptive	nrms	1990	1990-2015	All Crops	Default	SugarCrop	1997	8.62807	8.98938
Hybrid Linear Adaptive	nrms	1990	1990-2015	All Crops	Default	SugarCrop	1998	8.66597	9.02887
Hybrid Linear Adaptive	nrms	1990	1990-2015	All Crops	Default	SugarCrop	1999	8.60349	8.96377
Hybrid Linear Adaptive	nrms	1990	1990-2015	All Crops	Default	SugarCrop	2000	8.45757	8.81174
Hybrid Linear Adaptive	nrms	1990	1990-2015	All Crops	Default	SugarCrop	2001	8.34477	8.69422
Hybrid Linear Adaptive	nrms	1990	1990-2015	All Crops	Default	SugarCrop	2002	8.39661	8.74822
Hybrid Linear Adaptive	nrms	1990	1990-2015	All Crops	Default	SugarCrop	2003	8.31549	8.66371
Hybrid Linear Adaptive	nrms	1990	1990-2015	All Crops	Default	SugarCrop	2004	8.35603	8.70595
Hybrid Linear Adaptive	nrms	1990	1990-2015	All Crops	Default	SugarCrop	2005	8.24668	8.59202
Hybrid Linear Adaptive	nrms	1990	1990-2015	All Crops	Default	SugarCrop	2006	8.1122	8.45191
Hybrid Linear Adaptive	nrms	1990	1990-2015	All Crops	Default	SugarCrop	2007	8.08356	8.42207
Hybrid Linear Adaptive	nrms	1990	1990-2015	All Crops	Default	SugarCrop	2008	7.91316	8.24453
Hybrid Linear Adaptive	nrms	1990	1990-2015	All Crops	Default	SugarCrop	2009	8.29685	8.64429
Hybrid Linear Adaptive	nrms	1990	1990-2015	All Crops	Default	SugarCrop	2010	8.43642	8.78971
Hybrid Linear Adaptive	nrms	1990	1990-2015	All Crops	Default	SugarCrop	2011	7.70206	8.02459
Hybrid Linear Adaptive	nrms	1990	1990-2015	All Crops	Default	SugarCrop	2012	8.53666	8.89415
Hybrid Linear Adaptive	nrms	1990	1990-2015	All Crops	Default	SugarCrop	2013	8.83644	9.20647
Hybrid Linear Adaptive	nrms	1990	1990-2015	All Crops	Default	SugarCrop	2014	8.91966	9.29318
Hybrid Linear Adaptive	nrms	1990	1990-2015	All Crops	Default	SugarCrop	2015	8.97538	9.35124
Hybrid Linear Adaptive	nrms	1990	1990-2015	All Crops	Default	Root_Tuber	1990	5.74808	5.9508
Hybrid Linear Adaptive	nrms	1990	1990-2015	All Crops	Default	Root_Tuber	1991	5.81057	6.01549
Hybrid Linear Adaptive	nrms	1990	1990-2015	All Crops	Default	Root_Tuber	1992	5.82696	6.03247
Hybrid Linear Adaptive	nrms	1990	1990-2015	All Crops	Default	Root_Tuber	1993	5.87919	6.08654
Hybrid Linear Adaptive	nrms	1990	1990-2015	All Crops	Default	Root_Tuber	1994	5.87179	6.07888
Hybrid Linear Adaptive	nrms	1990	1990-2015	All Crops	Default	Root_Tuber	1995	5.85265	6.05906
Hybrid Linear Adaptive	nrms	1990	1990-2015	All Crops	Default	Root_Tuber	1996	5.88782	6.09547
Hybrid Linear Adaptive	nrms	1990	1990-2015	All Crops	Default	Root_Tuber	1997	5.97055	6.18112
Hybrid Linear Adaptive	nrms	1990	1990-2015	All Crops	Default	Root_Tuber	1998	5.98638	6.1975
Hybrid Linear Adaptive	nrms	1990	1990-2015	All Crops	Default	Root_Tuber	1999	5.91735	6.12605
Hybrid Linear Adaptive	nrms	1990	1990-2015	All Crops	Default	Root_Tuber	2000	5.7989	6.00342
Hybrid Linear Adaptive	nrms	1990	1990-2015	All Crops	Default	Root_Tuber	2001	5.69974	5.90076
Hybrid Linear Adaptive	nrms	1990	1990-2015	All Crops	Default	Root_Tuber	2002	5.72518	5.92709
Hybrid Linear Adaptive	nrms	1990	1990-2015	All Crops	Default	Root_Tuber	2003	5.66641	5.86625
Hybrid Linear Adaptive	nrms	1990	1990-2015	All Crops	Default	Root_Tuber	2004	5.68644	5.88699
Hybrid Linear Adaptive	nrms	1990	1990-2015	All Crops	Default	Root_Tuber	2005	5.62097	5.81921
Hybrid Linear Adaptive	nrms	1990	1990-2015	All Crops	Default	Root_Tuber	2006	5.54814	5.74381
Hybrid Linear Adaptive	nrms	1990	1990-2015	All Crops	Default	Root_Tuber	2007	5.53106	5.72612
Hybrid Linear Adaptive	nrms	1990	1990-2015	All Crops	Default	Root_Tuber	2008	5.42278	5.61403
Hybrid Linear Adaptive	nrms	1990	1990-2015	All Crops	Default	Root_Tuber	2009	5.70238	5.9035
Hybrid Linear Adaptive	nrms	1990	1990-2015	All Crops	Default	Root_Tuber	2010	5.81665	6.02179
Hybrid Linear Adaptive	nrms	1990	1990-2015	All Crops	Default	Root_Tuber	2011	5.30931	5.49655
Hybrid Linear Adaptive	nrms	1990	1990-2015	All Crops	Default	Root_Tuber	2012	5.88721	6.09484
[truncated: 289 more rows]
